# 1 **Unifying the known and unknown microbial** 2 **coding sequence space**

3

4 Chiara Vanni<sup>1,2</sup>, Matthew S. Schechter<sup>1,3</sup>, Silvia G. Acinas<sup>4</sup>, Albert Barberán<sup>5</sup>, Pier Luigi  
5 Buttigieg<sup>6</sup>, Emilio O. Casamayor<sup>7</sup>, Tom O. Delmont<sup>8</sup>, Carlos M. Duarte<sup>9</sup>, A. Murat Eren<sup>3,10</sup>,  
6 Robert D. Finn<sup>11</sup>, Renzo Kottmann<sup>1</sup>, Alex Mitchell<sup>11</sup>, Pablo Sanchez<sup>4</sup>, Kimmo Siren<sup>12</sup>, Martin  
7 Steinegger<sup>13,14</sup>, Frank Oliver Glöckner<sup>15,16,2</sup>, Antonio Fernandez-Guerra<sup>1,17\*</sup>

8

## 9 **Affiliations**

10 1 Microbial Genomics and Bioinformatics Research Group, Max Planck Institute for Marine  
11 Microbiology, Celsiusstraße 1, 28359, Bremen, Germany

12 2 Jacobs University Bremen, Campus Ring 1, 28759 Bremen, Germany

13 3 Department of Medicine, University of Chicago, Chicago, IL 60637, USA

14 4 Department of Marine Biology and Oceanography, Institut de Ciències del Mar, CSIC,  
15 Barcelona, Spain.

16 5 Department of Environmental Science, University of Arizona, Tucson, 85721 AZ, USA

17 6 Alfred Wegener Institute, Helmholtz Centre for Polar and Marine Research, Am Handelshafen  
18 12, 27570 Bremerhaven, Germany

19 7 Center for Advanced Studies of Blanes CEAB-CSIC, Spanish Council for Research, Blanes,  
20 Spain

21 8 Génomique Métabolique, Genoscope, Institut François Jacob, CEA, CNRS, Univ Evry,  
22 Université Paris-Saclay, 91057 Evry, France  
23 9 Red Sea Research Centre (RSRC) and Computational Bioscience Research Center (CBRC),  
24 King Abdullah University of Science and Technology, Thuwal 23955, Saudi Arabia  
25 10 Josephine Bay Paul Center, Marine Biological Laboratory, Woods Hole, MA 02543, USA  
26 11 European Molecular Biology Laboratory, European Bioinformatics Institute (EMBL-EBI),  
27 Wellcome Genome Campus, Hinxton, Cambridge CB10 1SD, UK  
28 12 Section for Evolutionary Genomics, The GLOBE Institute, University of Copenhagen,  
29 Copenhagen, Denmark  
30 13 School of Biological Sciences, Seoul National University, Seoul, 08826, South Korea  
31 14 Institute of Molecular Biology and Genetics, Seoul National University, Seoul, 08826, South  
32 Korea  
33 15 University of Bremen, MARUM, Leobener Str. 8, 28359 Bremen, Germany  
34 Life Sciences and Chemistry, Campus Ring 1, 28759 Bremen, Germany  
35 16 Computing Center, Helmholtz Center for Polar and Marine Research, Am Handelshafen 12,  
36 27570 Bremerhaven, Germany  
37 17 Lundbeck GeoGenetics Centre, The Globe Institute, University of Copenhagen, 1350  
38 Copenhagen, Denmark  
39  
40 \*Corresponding author: Antonio Fernandez-Guerra, [antonio.fernandez-guerra@sund.ku.dk](mailto:antonio.fernandez-guerra@sund.ku.dk)  
41

## 42 Abstract

43 Genes of unknown function are among the biggest challenges in molecular biology, especially in  
44 microbial systems, where 40%-60% of the predicted genes are unknown. Despite previous  
45 attempts, systematic approaches to include the unknown fraction into analytical workflows are  
46 still lacking. Here, we propose a conceptual framework and a computational workflow that  
47 bridge the known-unknown gap in genomes and metagenomes. We showcase our approach by  
48 exploring 415,971,742 genes predicted from 1,749 metagenomes and 28,941 bacterial and  
49 archaeal genomes. We quantify the extent of the unknown fraction, its diversity, and its  
50 relevance across multiple biomes. Furthermore, we provide a collection of 283,874 lineage-  
51 specific genes of unknown function for *Cand.* Patescibacteria, being a significant resource to  
52 expand our understanding of their unusual biology. Finally, by identifying a target gene of  
53 unknown function for antibiotic resistance, we demonstrate how we can enable the generation  
54 of hypotheses that can be used to augment experimental data.

## 55 Introduction

56 Thousands of isolate, single-cell, and metagenome-assembled genomes are guiding us towards  
57 a better understanding of life on Earth (Almeida et al., 2019; Cross et al., 2019; Delmont et al.,  
58 2020; Hug et al., 2016; Kopf et al., 2015; Pachiadaki et al., 2019; Pasolli et al., 2019; Sunagawa  
59 et al., 2015). At the same time, the ever-increasing number of genomes and metagenomes,  
60 unlocking uncharted regions of life's diversity, (Brown et al., 2015; Eloë-Fadrosh et al., 2016;  
61 Hug et al., 2016) are providing new perspectives on the evolution of life (Parks et al., 2018;  
62 Spang et al., 2015). However, our rapidly growing inventories of new genes have a glaring  
63 issue: between 40% and 60% cannot be assigned to a known function (Almeida et al., 2020;  
64 Bernard, Pathmanathan, Lannes, Lopez, & Baptiste, 2018; Carradec et al., 2018; Price et al.,  
65 2018). Current analytical approaches for genomic and metagenomic data (Chen et al., 2019;  
66 Franzosa et al., 2018; Huerta-Cepas et al., 2017; Mitchell et al., 2020; Quince, Walker,  
67 Simpson, Loman, & Segata, 2017) generally do not include this uncharacterized fraction in  
68 downstream analyses, constraining their results to conserved pathways and housekeeping  
69 functions (Quince et al., 2017). This inability to handle the unknown is an immense impediment  
70 to realizing the potential for discovery of microbiology and molecular biology at large (Bernard et  
71 al., 2018; Hanson, Pribat, Waller, & Crécy-Lagard, 2010). Predicting function from traditional  
72 single sequence similarity appears to have yielded all it can (Arnold, 1998, 2018; Brandenburg,  
73 Fasan, & Arnold, 2017), thus several groups have attempted to resolve gene function by other  
74 means. Such efforts include combining biochemistry and crystallography (Jaroszewski et al.,  
75 2009); using environmental co-occurrence (Buttigieg et al., 2013); by grouping those genes into  
76 evolutionarily related families (Bateman, Coggill, & Finn, 2010; Brum et al., 2016; Wyman, Avila-  
77 Herrera, Nayfach, & Pollard, 2018; Yooseph et al., 2007); using remote homologies (Bitard-  
78 Feildel & Callebaut, 2017; Lobb, Kurtz, Moreno-Hagelsieb, & Doxey, 2015); or more recently  
79 using deep learning approaches (Bileschi et al., 2019; Liu, 2017). In 2018, Price et al. (Price et

80 al., 2018) developed a high-throughput experimental pipeline that provides mutant phenotypes  
81 for thousands of bacterial genes of unknown function being one of the most promising methods  
82 to tackle the unknown. Despite their promise, experimental methods are labor-intensive and  
83 require novel computational methods that could bridge the existing gap between the known and  
84 unknown coding sequence space (CDS-space).  
85 Here we present a conceptual framework and a computational workflow that closes the gap  
86 between the known and unknown CDS-space by connecting genomic and metagenomic gene  
87 clusters. Our approach adds context to vast amounts of unknown biology, providing an  
88 invaluable resource to understand the unknown functional fraction better and boost the current  
89 methods for its experimental characterization. The application of our approach to 415,971,742  
90 genes predicted from 1,749 metagenomes and 28,941 bacterial and archaeal genomes  
91 revealed that the unknown fraction (1) is smaller than expected, (2) is exceptionally diverse, and  
92 (3) is phylogenetically more conserved and predominantly lineage-specific at the Species level.  
93 Finally, we show how we can connect all the outputs produced by our approach to augment the  
94 results from experimental data and add context to genes of unknown function through  
95 hypothesis-driven molecular investigations.

## 96 Results

### 97 A conceptual framework and a computational workflow to unify 98 the known and the unknown coding sequence space

99 We created the conceptual and technical foundations to unify the known and unknown CDS-  
100 space facilitating the integration of the genes of unknown function into ecological, evolutionary  
101 and biotechnological investigations. First, we conceptually partitioned the known and unknown  
102 fractions into (1) Known with Pfam annotations (K), (2) Known without Pfam annotations (KWP),  
103 (3) Genomic unknown (GU), and (4) Environmental unknown (EU) (Fig. 1A). The framework  
104 introduces a subtle change of paradigm compared to traditional approaches where our objective  
105 is to provide the best representation of the unknown space. We gear all our efforts towards  
106 finding sequences without any evidence of known homologies by pushing the search space  
107 beyond the *twilight zone* of sequence similarity (Rost, 1999). With this objective in mind, we use  
108 gene clusters (GCs) instead of genes as the fundamental unit to compartmentalize the CDS-  
109 space owing to their unique characteristics (Fig. 1B). (1) GCs produce a structured CDS-space  
110 reducing its complexity (Fig. 1B), (2) are independent of the known and unknown fraction, (3)  
111 are conserved across environments and organisms, and (4) can be used to aggregate  
112 information from different sources (Fig. 1A). Moreover, the GCs provide a good compromise in  
113 terms of resolution for analytical purposes, and owing to their unique properties, one can  
114 perform analyses at different scales. For fine-grained analyses, we can exploit the gene  
115 associations within each GC; and for coarse-grained analyses, we can create groups of GCs  
116 based on their shared homologies (Fig. 1B).

117

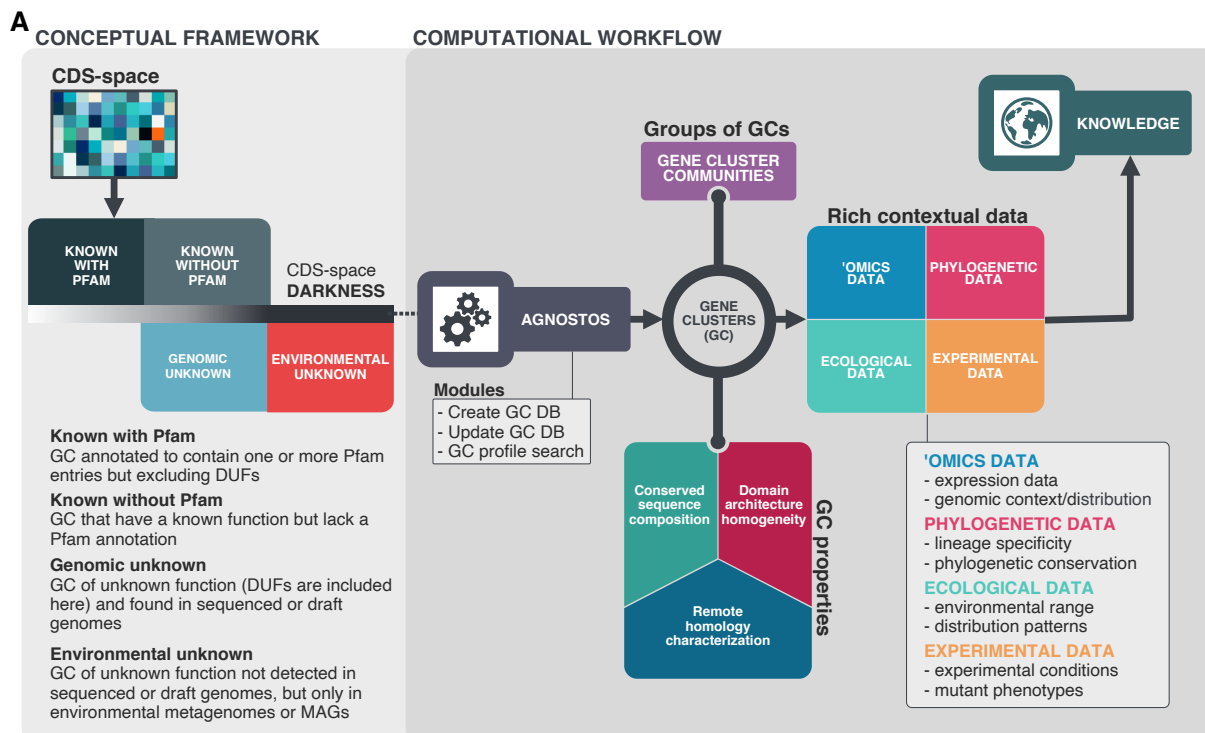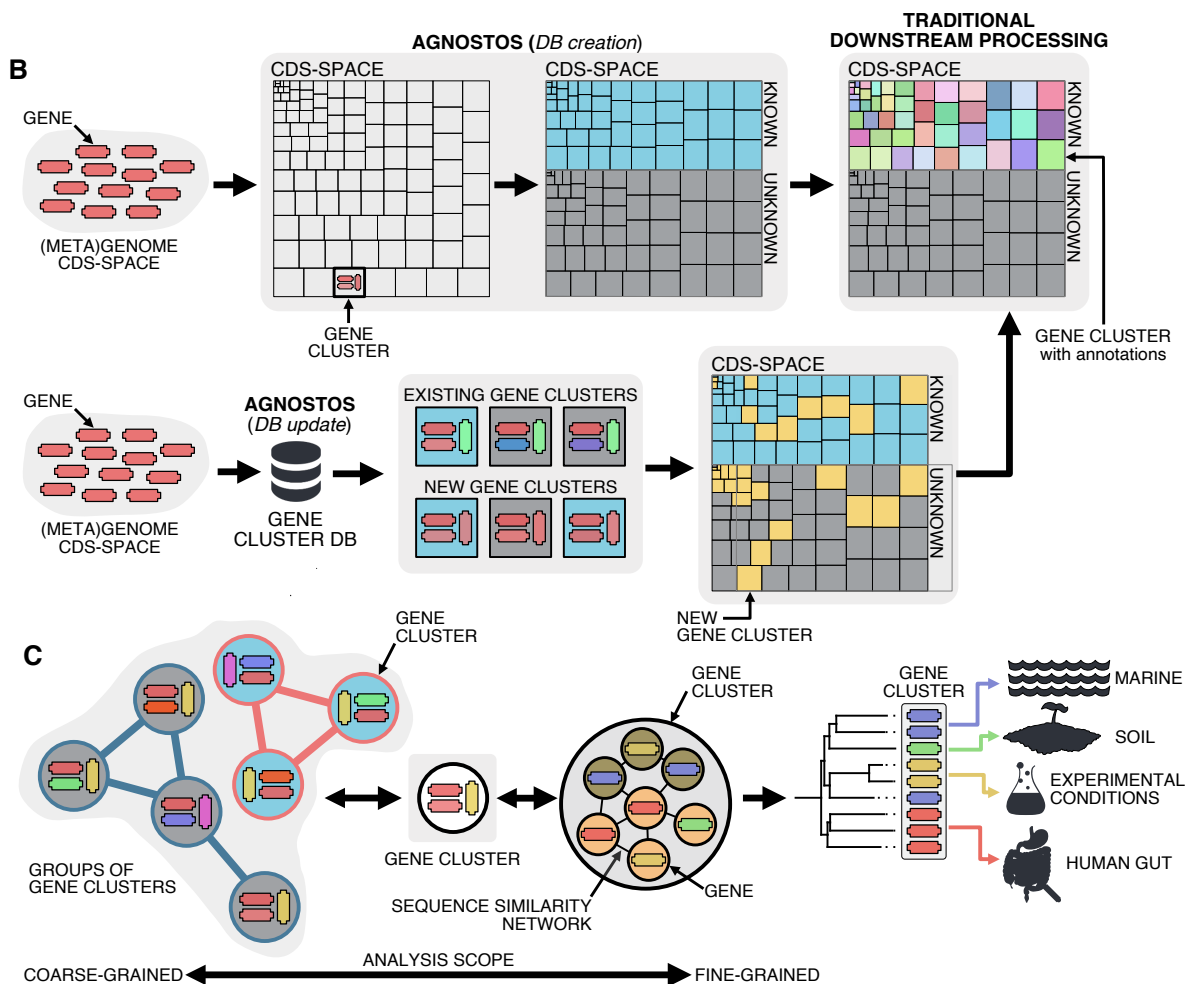

119 **Figure 1:** Conceptual framework to unify the known and unknown CDS-space and integration of the  
120 framework in the current analytical workflows (A) Link between the conceptual framework and the  
121 computational workflow to partition the CDS-space in the four conceptual categories. AGNOSTOS infers,  
122 validates and refines the GCs and combines them in gene cluster communities (GCCs). Then, it classifies  
123 them in one of the four conceptual categories based on their level of 'darkness'. Finally, we add context to  
124 each GC based on several sources of information, providing a robust framework for generating  
125 hypotheses that can be used to augment experimental data. (B) The computational workflow provides two  
126 mechanisms to structure the CDS-space using GCs, de novo creation of the GCs (*DB creation*), or  
127 integrating the dataset in an existing GC database (*DB update*). The structured CDS-space can then be  
128 plugged into traditional analytical workflows to annotate the genes within each GC of the known fraction.  
129 With AGNOSTOS, we provide the opportunity to integrate the unknown fraction into the current  
130 microbiome analyses easily. C) The versatility of the GCs enables analyses at different scales depending  
131 on the scope of our experiments. We can group GCs in gene cluster communities based on their shared  
132 homologies to perform coarse-grained analyses. On the other hand, we can design fine-grained analyses  
133 using the relationships between the genes in a GC, i.e., detecting network modules in the GC inner  
134 sequence similarity network. Additionally, given that GCs are conserved across environments, organisms  
135 and experimental conditions give us access to an unprecedented amount of information to design and  
136 interpret experimental data.

137

138 Driven by the concepts defined in the conceptual framework, we developed AGNOSTOS, a  
139 computational workflow that infers, validates, refines, and classifies GCs in the four proposed  
140 categories (Fig. 1A; Fig. 1B; Supp. Fig 1). AGNOSTOS provides two operational modules (*DB*  
141 *creation* and *DB update*) to produce GCs with a highly conserved intra-homogeneous structure  
142 (Fig. 1B), both in terms of sequence similarity and domain architecture homogeneity; it exhausts  
143 any existing homology to known genes and provides a proper delimitation of the unknown CDS-  
144 space before classifying each GC in one of the four categories (Methods). In the last step, we  
145 decorate each GC with a rich collection of contextual data compiled from different sources or  
146 generated by analyzing the GC contents in different contexts (Fig. 1A). For each GC, we also  
147 offer several products that can be used for analytical purposes like improved representative  
148 sequences, consensus sequences, sequence profiles for MMseqs2 (Steinegger & Soding,  
149 2017) and HHblits (Steinegger, Meier, et al., 2019), or the GC members as a sequence  
150 similarity network (Methods). To complement the collection, we also provide a subset of what  
151 we define as *high-quality* GCs. The defining criteria are (1) the representative is a complete  
152 gene and (2) more than one-third of genes within a GC are complete genes.



## 153 Partitioning and contextualizing the coding sequence space of 154 genomes and metagenomes

155 We used our approach to explore the unknown CDS-space of 1,749 microbial metagenomes  
156 derived from human and marine environments, and 28,941 genomes from the GTDB\_r86 (Supp  
157 Fig 2A). The initial gene prediction of AGNOSTOS (Supp Fig 1) produced 322,248,552 genes  
158 from the environmental dataset and assigned Pfam annotations to 44% of them. Next, it  
159 clustered the predicted genes in 32,465,074 GCs. For the downstream processing, we kept  
160 3,003,897 GCs (83% of the original genes) after filtering out any GC that contained less than  
161 ten genes (Skewes-Cox, Sharpton, Pollard, & DeRisi, 2014) removing 9,549,853 clusters and  
162 19,911,324 singletons (Supp Fig 2A; Supp. Note 1). The validation process selected 2,940,257  
163 *good-quality* clusters (Fig. 1B; Supp. Table 1; Supp. Note 2), which resulted in 43% of them  
164 being members of the unknown CDS-space after the classification and remote homology  
165 refinement steps (Supp Fig 2A, Supp. Note 3). We build the link between the environmental and  
166 genomic CDS-space by expanding the final collection of GCs with the genes predicted from  
167 GTDB\_r86 (Supp Fig 2A). Our environmental GCs already included 72% of the genes from  
168 GTDB\_r86; 22% of them created 2,400,037 new GCs, and the rest 6% resulted in singleton  
169 GCs (Supp Fig 2A; Supp. Note 4; Supp. Note 5). The final dataset includes 5,287,759 GCs  
170 (Supp Fig 2A), with both datasets sharing only 922,599 GCs (Supp Fig 2B). The addition of the  
171 GTDB\_r86 genes increased the proportion of GCs in the unknown CDS-space to 54%. As the  
172 final step, the workflow generated a subset of 203,217 *high-quality* GCs (Supp. Table 2; Supp.  
173 Fig 3). In these *high-quality* clusters, we identified 12,313 clusters potentially encoding for small  
174 proteins ( $\leq 50$  amino acids). Most of these GCs are unknown (66%), which agrees with recent  
175 findings on novel small proteins from metagenomes (Sberro et al., 2019). The KWP category  
176 contains the largest proportion of incomplete genes (Supp. Table 3), disrupting the detection  
177 and assignment of Pfam domains. But it also incorporates sequences with an unusual amino

178 acid composition that has homology to proteins with high levels of disorder in the DPD database  
179 (Perdigão, Rosa, & O'Donoghue, 2017) and has characteristic functions of intrinsically  
180 disordered proteins (Habchi, Tompa, Longhi, & Uversky, 2014) (IDP) like cellular processes and  
181 signaling as predicted by eggNOG annotations (Supp. Table 4).

182 As part of the workflow, each GC is complemented with a rich set of information, as shown in  
183 Fig 1A (Supp. Table 5; Supp. Note 6).

## 184 Beyond the twilight zone, communities of gene clusters

185 The method we developed to group GCs in gene cluster communities (GCCs) (Fig. 2A) reduced  
186 the final collection of GCs by 87%, producing 673,601 GCCs (Methods; Fig. 2B; Supp. Note 7).  
187 We validated our approach to capture remote homologies between related GCs using two well-  
188 known gene families present in our environmental datasets, proteorhodopsins (Olson,  
189 Yoshizawa, Boeuf, Iwasaki, & DeLong, 2018) and bacterial ribosomal proteins (Méheust,  
190 Burstein, Castelle, & Banfield, 2019). Our dataset contained 64 GCs (12,184 genes) and 3  
191 GCCs (Supp Note 8) classified as proteorhodopsin (PR). One *Known* GCC contained 99% of  
192 the PR annotated genes (Fig. 2C), except 85 genes taxonomically annotated as viral and  
193 assigned to the *PR Supercluster I* (Boeuf, Audic, Brillet-Guéguen, Caron, & Jeanthon, 2015)  
194 within two GU communities (five GU gene clusters; Supp. Note 8). For the ribosomal proteins,  
195 the results were not so satisfactory. We identified 1,843 GCs (781,579 genes) and 98 GCCs.  
196 The number of GCCs is larger than the expected number of ribosomal protein families (16) used  
197 for validation. When we use *high-quality* GCs (Supp. Note 8), we get closer to the expected  
198 number of GCCs (Fig. 2D). With this subset, we identified 26 GCCs and 145 GCs (1,687  
199 genes). The cross-validation of our method against the approach used in Méheust et al.  
200 (Méheust et al., 2019) (Supp. Note 9) confirms the intrinsic complexity of analyzing  
201 metagenomic data. Both approaches showed a high agreement in the GCCs identified (Supp.  
202 Table 9-1). Still, our method inferred fewer GCCs for each of the ribosomal protein families

203 (Supplementary Figure 9-3), coping better with the nuisances of a metagenomic setup, such as  
 204 incomplete genes (Supp. Table 6).  
 205

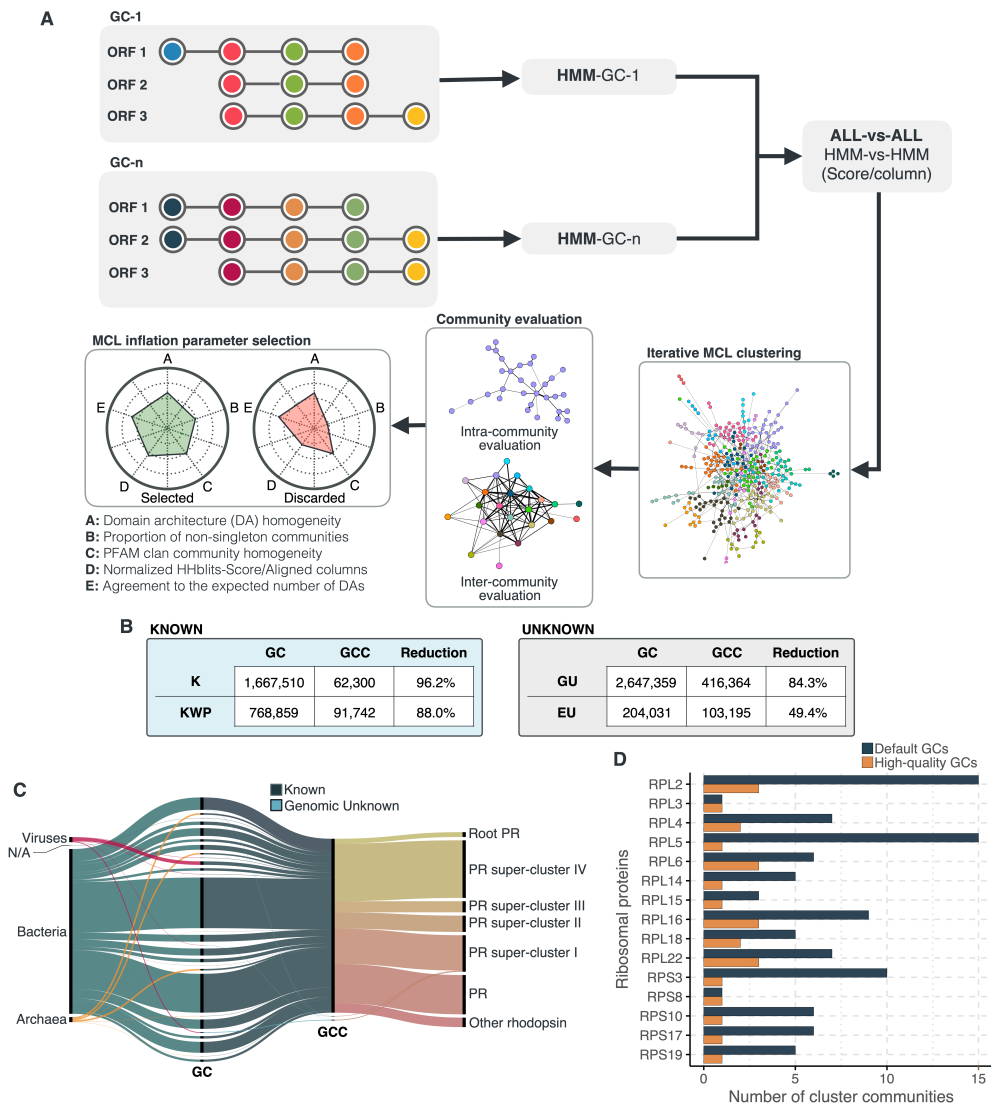

206

207 **Figure 2:** Overview and validation of the workflow to aggregate GCs in communities. (A) We inferred a  
 208 gene cluster homology network using the results of an all-vs-all HMM gene cluster comparison with  
 209 HHBLITS. The edges of the network are based on the HHblits-score/Aligned-columns. Communities are  
 210 identified by an iterative screening of different MCL inflation parameters and evaluated using five different  
 211 metrics that consider the inter- and intra-community properties. (B) Comparison of the number of GCs  
 212 and GCCs for each of the functional categories. (C) Validation of the GCCs inference based on the  
 213 environmental genes annotated as proteorhodopsins. Ribbons in the alluvial plot are genes, and each  
 214 stacked bar corresponds (from left to right) to the (1) gene taxonomic classification at the domain level,  
 215 (2) GC membership, (3) GCC membership and (4) MicRhoDE operational classification. (D) Validation of  
 216 the GCCs inference based on ribosomal proteins based on standard and high-quality GCs.

## 217 A smaller but highly diverse unknown coding sequence space

218 Combining clustering and remote homology searches reduces the extent of the unknown CDS-  
219 space compared to what is reported by the traditional genomic and metagenomic analysis  
220 approaches (Fig. 3A). Our workflow recruited as much as 71% of genes in human-related  
221 metagenomic samples and 65% of the genes in marine metagenomes into the known CDS-  
222 space. In both human and marine microbiomes, the genomic unknown fraction showed a similar  
223 proportion of genes (21%, Fig. 3A). The number of genes corresponding to EU gene clusters is  
224 higher in marine metagenomes; 12% of the genes are part of this GC category. We obtained a  
225 comparable result when we evaluated the genes from the GTDB\_r86, 75% of bacterial and 64%  
226 of archaeal genes were part of the known CDS-space. Archaeal genomes contained more  
227 unknowns than those from Bacteria, where 30% of the genes are classified as genomic  
228 unknowns in Archaea, and only 20% in Bacteria (Fig. 3A; Supp. Table 7). Our approach allows  
229 us to go beyond genes, and for the first time, we can provide a detailed characterization of the  
230 CDS-space at the amino acid level. From the 90,128,659,316 amino acids analyzed, the  
231 majority of the amino acids in metagenomes (74%) and GTDB\_r86 (80%) are in the known  
232 CDS-space (Fig. 3B; Supp. Table 7). In both cases, approximately 40% of the amino acids in  
233 the known CDS-space were part of a Pfam domain (Fig. 3B; Supp. Table 7). The proportion of  
234 amino acids in the unknown CDS-space ranged from 22% in metagenomes and 15% in  
235 GTDB\_r86. Pfam domains covered only 2% of the amino acids in the unknown CDS-space in  
236 both cases. To evaluate the differences between the two CDS-space fractions, we calculated  
237 the accumulation rates of GCs and GCCs. For the metagenomic dataset we used 1,264  
238 metagenomes (18,566,675 GCs and 282,580 GCCs) and for the genomic dataset 28,941  
239 genomes (9,586,109 GCs and 496,930 GCCs). The rate of accumulation of unknown GCs was  
240 three times higher than the known (2 times for the genomic), and both cases were far from  
241 reaching a plateau (Fig. 3C). This is not the case for the GCC accumulation curves (Supp Fig

242 4B), where they reached a plateau. The accumulation rate is largely determined by the number  
243 of singletons, especially singletons from EUs (Supp note 11 and Supp. Fig 5). While the  
244 accumulation rate of known GCs between marine and human metagenomes is almost identical,  
245 there are striking differences for the unknown GCs (Fig. 3D). These differences are maintained  
246 even when we remove the virus-enriched samples from the marine metagenomes (Supp Fig  
247 4A). Although the marine metagenomes include a large variety of environments, from coastal to  
248 the deep sea, the known space remains quite constrained.

249 Despite only including marine and human metagenomes in our database, our coverage of other  
250 databases and environments is quite comprehensive, with an overall coverage of 76% (Supp.  
251 Note 12). The lowest covered biomes are freshwater, soil and human non-digestive as revealed  
252 by the screening of MGnify (Mitchell et al., 2020) (release 2018\_09; 11 biomes; 843,535,6116  
253 proteins) where we assigned 74% of the MGnify proteins into one of our categories  
254 (Supplementary Fig. 6). Furthermore, as a result of this evaluation, we classified 20% of the  
255 FunkFams (Wyman et al., 2018) and 44% of the unknowns used by Price et al. (Price et al.,  
256 2018) to the known fraction (Supp. Table 12-1).

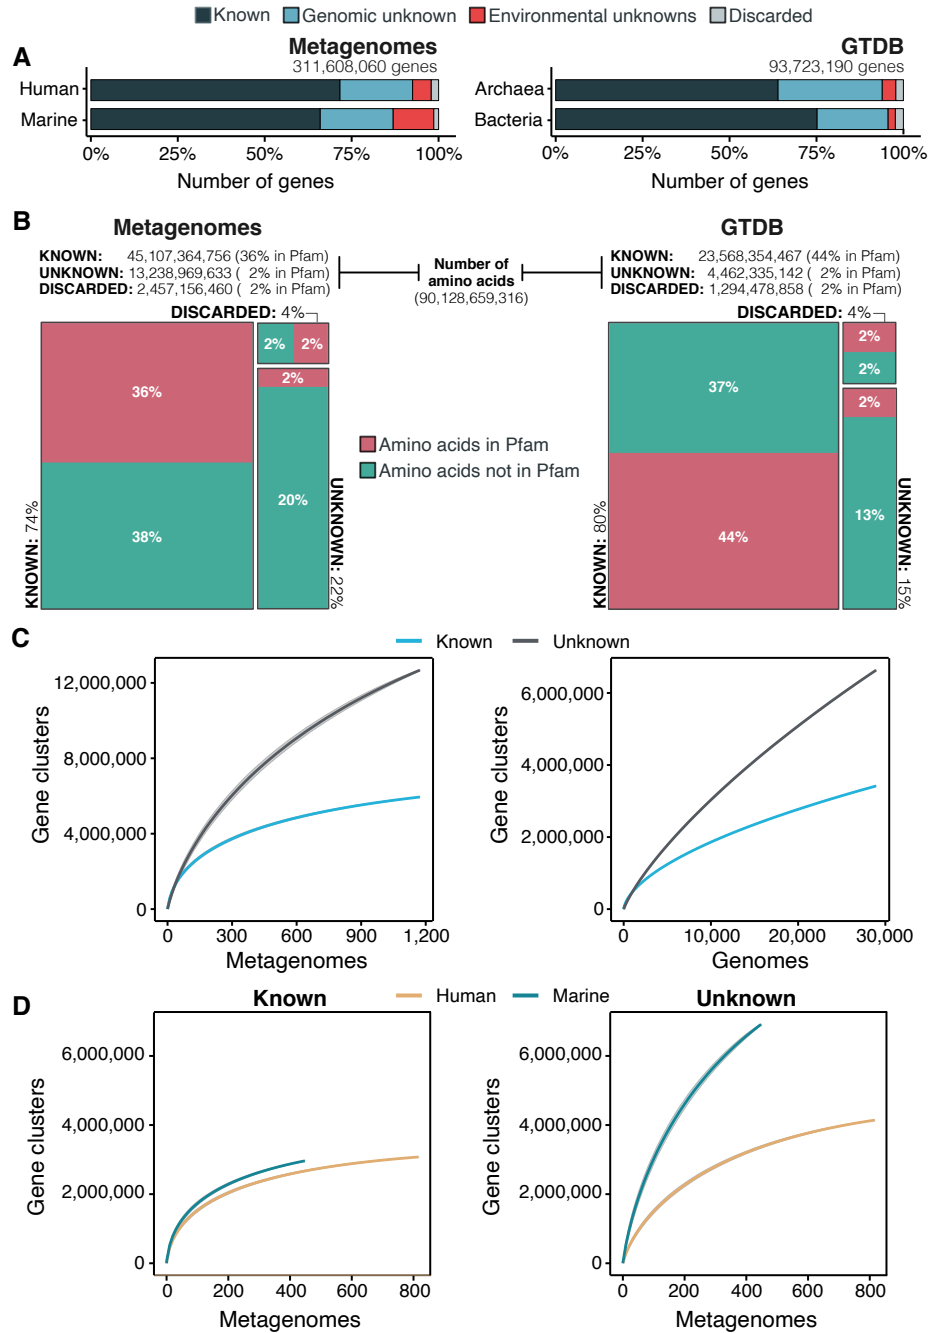

257

258 **Figure 3:** The extent of the known and unknown coding sequence space (A) Proportion of genes in the  
 259 known and unknown. (B) Amino acid distribution in the known and unknown CDS-space. (C)  
 260 Accumulation curves for the known and unknown CDS-space at the GC- level for the metagenomic and  
 261 genomic data. from TARA, MALASPINA, OSD2014 and HMP-I/II projects. (D) Collector curves comparing  
 262 the human and marine biomes. Colored lines represented the mean of 1000 permutations and shaded in  
 263 grey the standard deviation. Non-abundant singleton clusters were excluded from the accumulation  
 264 curves calculation.

## 265 The unknown coding sequence space has a limited ecological 266 distribution in human and marine environments

267 Although the role of the unknown fraction in the environment is still a mystery, the large number  
268 of gene counts and abundance observed underlines its inherent ecological relevance (Fig. 4A).  
269 In some metagenomes, the genomic unknown fraction can account for more than 40% of the  
270 total gene abundance observed (Fig. 4A). The environmental unknown fraction is also relevant  
271 in several samples, where singleton GCs are the majority (Fig. 4A). We identified two  
272 metagenomes with an unusual composition in terms of environmental unknown singletons. The  
273 marine metagenome corresponds to a sample from Lake Faro (OSD42), a meromictic saline  
274 with a unique extreme environment where Archaea plays an important role (La Cono et al.,  
275 2013). The HMP metagenome (SRS143565) corresponds to a human sample from the right  
276 cubital fossa from a healthy female subject. To understand this unusual composition, we should  
277 perform further analyses to discard potential technical artifacts like sample contamination. The  
278 ratio between the unknown and known GCs revealed that the metagenomes located at the  
279 upper left quadrant in Fig. 4B-C are enriched in GCs of unknown function. In human  
280 metagenomes, we can distinguish between body sites, with the gastrointestinal tract, where  
281 microbial communities are expected to be more diverse and complex, significantly enriched with  
282 genomic unknowns. The HMP metagenomes with the largest ratio of unknowns are those  
283 samples identified to contain crAssphages (Dubinkina, Ischenko, Ulyantsev, Tyakht, & Alexeev,  
284 2016; Edwards et al., 2019) and HPV viruses (Ma et al., 2014) (Supp. Table 8; Supp. Fig. 7).  
285 Consistently, in marine metagenomes (Fig. 4D) we can separate between size fractions, where  
286 the highest ratio in genomic and environmental unknowns corresponds to the ones enriched  
287 with viruses and giant viruses.

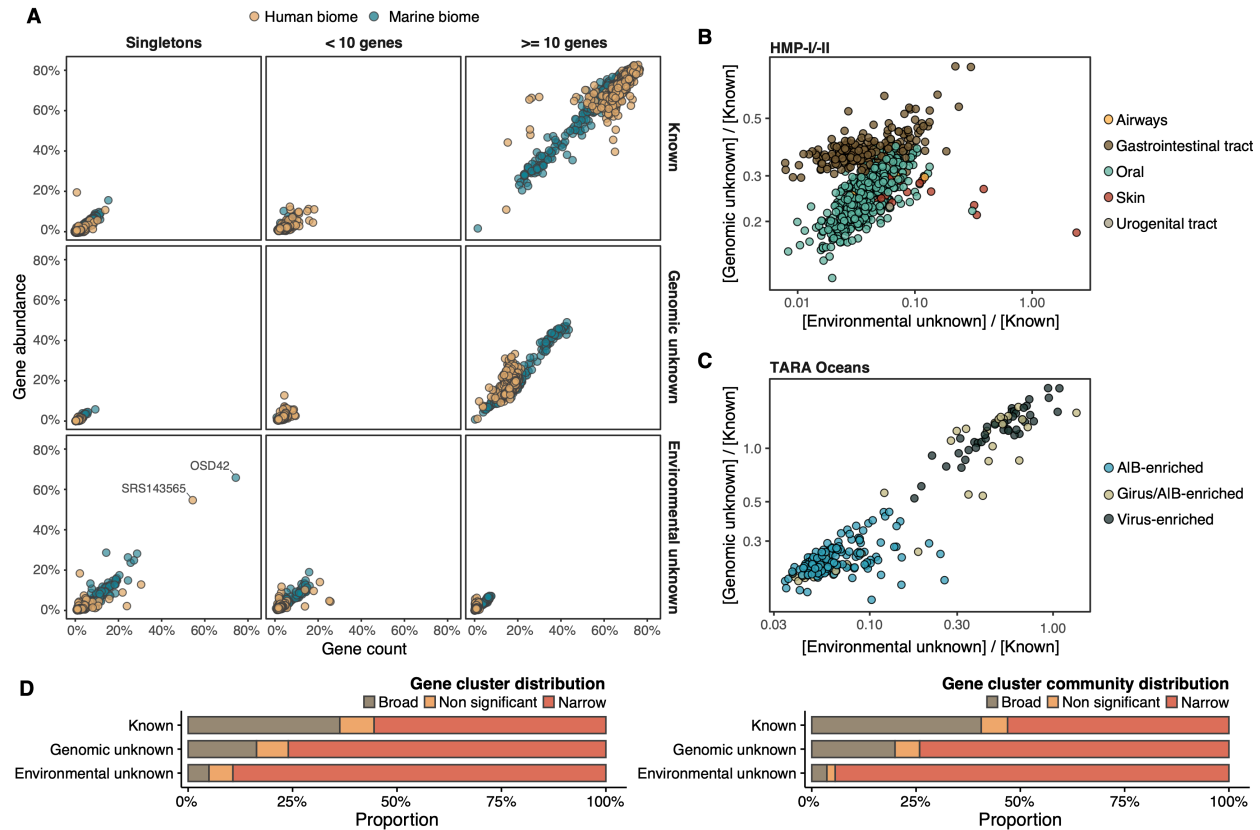

288

289 **Figure 4:** Distribution of the unknown coding sequence space in the human and marine metagenomes  
 290 (A) Ratio between the proportion of the number of genes / their estimated abundances per cluster  
 291 category and biome. Columns represented in the facet depicts three cluster categories based on the size  
 292 of the clusters. (B) Relationship between the ratio of Genomic unknowns and Environmental unknowns in  
 293 the HMP-I/II metagenomes. Gastrointestinal tract metagenomes are enriched in Genomic unknown  
 294 coding sequences compared to the other body sites. (C) Relationship between the ratio of Genomic  
 295 unknowns and Environmental unknowns in the TARA Oceans metagenomes. Girus and virus enriched  
 296 metagenomes show a higher proportion of both unknown coding sequences (genomic and  
 297 environmental) than the Archaea|Bacteria enriched fractions. (D) Environmental distribution of GCs and  
 298 GCCs based on Levin's niche breadth index. We obtained the significance values after generating 100  
 299 null gene cluster abundance matrices using the *quasiswap* algorithm.

300

301 To complement the previous findings, we performed a large-scale analysis to investigate the GC  
 302 occurrence patterns in the environment. The narrow distribution of the unknown fraction (Fig.  
 303 4D) suggests that these GCs might provide a selective advantage and be necessary to adapt to  
 304 specific environmental conditions. But the pool of broadly distributed environmental unknowns is  
 305 the most exciting result. We identified traces of potential ubiquitous organisms left



306 uncharacterized by traditional approaches, as more than 80% of these GCs cannot be  
307 associated with a metagenome-assembled genome (MAG) (Supp Table 9, Supp. Note 10).

## 308 The genomic unknown coding sequence space is lineage-specific

309 With the inclusion of the genomes from GTDB\_r86, we have access to a phylogenomic  
310 framework that can be used to assess how exclusive is a GC within a lineage (lineage-specificity  
311 (Mendler et al., 2019)) and how conserved is a GC across clades (phylogenetic conservation  
312 (Martiny, Treseder, & Pusch, 2013)). We identified 781,814 lineage-specific GCs and 464,923  
313 phylogenetically conserved ( $P < 0.05$ ) GCs in Bacteria (Supp. Table 10; Supp. Note 13 for  
314 Archaea). The number of lineage-specific GCs increases with the Relative Evolutionary  
315 Distance (Parks et al., 2018) (Fig. 5A) and differences between the known and the unknown  
316 fraction start to be evident at the Family level resulting in 4X more unknown lineage-specific  
317 GCs at the Species level. The unknown GCs are more phylogenetically conserved than the  
318 known (Fig. 5B,  $p < 0.0001$ ), revealing the importance of the genome's uncharacterized fraction.  
319 However, this is not the case for the lineage-specific and phylogenetically conserved GCs,  
320 where the unknown GCs are less phylogenetically conserved (Fig. 5B), agreeing with the large  
321 number of lineage-specific GCs at Genus and Species level. To discard the possibility that the  
322 lineage-specific GCs of unknown function have a viral origin, we screened all GTDB\_r86  
323 genomes for prophages. We only found 37,163 lineage-specific GCs in prophage genomic  
324 regions, being 86% GCs of unknown function. After unveiling the potential relevance of the GCs  
325 of unknown function in bacterial genomes, we identified phyla in GTDB\_r86 enriched with these  
326 types of clusters. A clear pattern emerged when we partitioned the phyla based on the ratio of  
327 known to unknown GCs and vice versa (Fig. 5D), the phyla with a larger number of MAGs are  
328 enriched in GCs of unknown function Figure 5D. Phyla with a high proportion of non-classified  
329 GCs (those discarded during the validation steps) contain a small number of genomes and are  
330 primarily composed of MAGs. These groups of phyla highly enriched in unknowns and

331 represented mainly by MAGs include newly described phyla such as *Cand.* Riflebacteria and  
 332 *Cand.* Patescibacteria (Anantharaman et al., 2018; Brown et al., 2015; Rinke et al., 2013), both  
 333 with the largest unknown to known ratio.  
 334

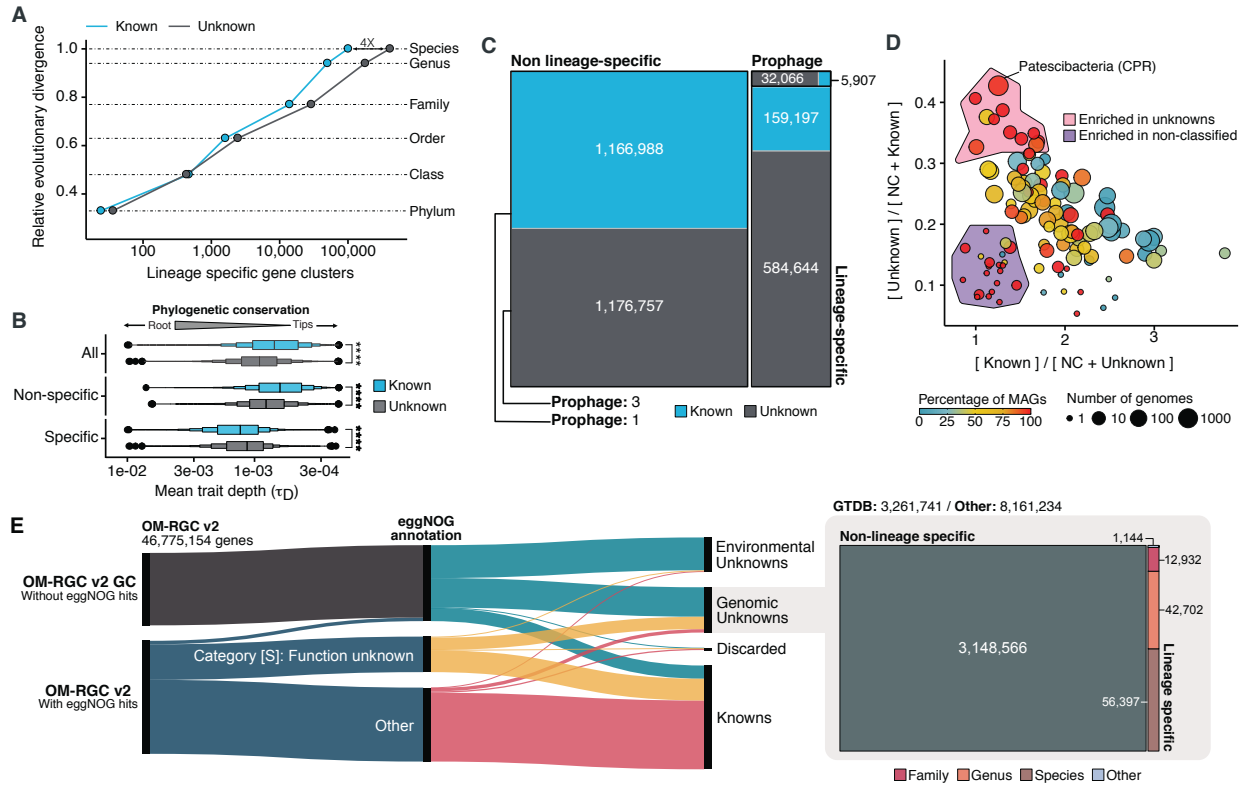

335  
 336  
 337 **Figure 5:** Phylogenomic exploration of the unknown coding sequence space. (A) Distribution of the  
 338 lineage-specific GCs by taxonomic level. Lineage-specific unknown GCs are more abundant in the lower  
 339 taxonomic levels (Genus, Species). (B) Phylogenetic conservation of the known and unknown coding  
 340 sequence space in 27,372 bacterial genomes from GTDB\_r86. We observe differences in the  
 341 conservation between the known and the unknown coding sequence space for lineage- and non-lineage  
 342 specific GCs (paired Wilcoxon rank-sum test; all p-values < 0.0001). (C) The majority of the lineage-  
 343 specific clusters are part of the unknown coding sequence space, being a small proportion found in  
 344 prophages present in the GTDB\_r86 genomes. (D) Known and unknown coding sequence space of the  
 345 27,732 GTDB\_r86 bacterial genomes grouped by bacterial phyla. Phyla are partitioned based on the ratio  
 346 of known to unknown GCs and vice versa. Phyla enriched in MAGs have higher proportions in GCs of  
 347 unknown function. Phyla with a high proportion of non-classified clusters (NC; discarded during the  
 348 validation steps) tend to contain a small number of genomes. (E) The alluvial plot's left side shows the  
 349 uncharacterized (OM-RGC v2 GC) and characterized (OM-RGC v2) fraction of the gene catalog. The  
 350 functional annotation is based on the eggNOG annotations provided by Salazar et al. (Salazar et al.,  
 351 2019). The right side of the alluvial plot shows the new organization of the OM-RGC v2 coding sequence  
 352 space based on the approach described in this study. The treemap in the right links the metagenomic and  
 353 genomic space adding context to the unknown fraction of the OM-RGC v2

354

355 We demonstrate the possibility of bridging genomic and metagenomic data and simultaneously  
356 unifying the known and unknown CDS-space by integrating the new Ocean Microbial Reference  
357 Gene Catalog (Salazar et al., 2019) (OM-RGC v2) into our database. We assigned 26,170,875  
358 genes to known GCs, 11,422,975 to genomic unknowns, 8,661,221 to environmental unknown  
359 and 520,083 were discarded. From the 11,422,975 genes classified as genomic unknowns, we  
360 could associate 3,261,741 to a GTDB\_r86 genome and we identified 113,175 as lineage-  
361 specific. The alluvial plot in Fig. 5E depicts the new organization of the OM-RGC v2 after being  
362 integrated into our framework and how we can provide context to the two original types of  
363 unknowns in the OM-RGC (those annotated as category S in eggNOG (Huerta-Cepas et al.,  
364 2019) and those without known homologs in the eggNOG database (Salazar et al., 2019)) that  
365 can lead to potential experimental targets at the organism level to complement the  
366 metatranscriptomic approach proposed by Salazar et al. (Salazar et al., 2019).

## 367 A structured coding sequence space augments the interpretation 368 of experimental data

369 We selected one of the experimental conditions tested in Price et al. (Price et al., 2018) to  
370 demonstrate the potential of our approach to augment experimental data. We compared the  
371 fitness values in plain rich medium with added Spectinomycin dihydrochloride pentahydrate to  
372 the fitness in plain rich medium (LB) in *Pseudomonas fluorescens* FW300-N2C3 (Fig. 6A). This  
373 antibiotic inhibits protein synthesis and elongation by binding to the bacterial 30S ribosomal  
374 subunit and interferes with the peptidyl tRNA translocation. We identified the gene with locus id  
375 AO356\_08590 that presents a strong phenotype (fitness = -3.1; t = -9.1) and has no known  
376 function. This gene belongs to the genomic unknown GC GU\_19737823. We can track this GC  
377 into the environment and explore the occurrence in the different samples we have in our

378 database. As expected, the GC is mostly found in non-human metagenomes (Fig. 6B) as  
379 *Pseudomonas* are common inhabitants of soil and water environments (Heffernan, Murphy, &  
380 Casey, 2009). However, finding this GC also in human-related samples is very interesting due  
381 to the potential association of *P. fluorescens* and human disease where Crohn's disease  
382 patients develop serum antibodies to this microbe (Scales, Dickson, LiPuma, & Huffnagle,  
383 2014). We can add another layer of information to the selected GC by looking at the associated  
384 remote homologs in the GCC GU\_c\_21103 (Fig. 6C). We identified all the genes in the  
385 GTDB\_r86 genomes that belong to the GCC GU\_c\_21103 (Supp. Table 11) and explored their  
386 genomic neighborhoods. All members from GU\_c\_21103 are constrained to the class  
387 *Gammaproteobacteria*, and interestingly GU\_19737823 is mostly exclusive to the order  
388 *Pseudomonadales*. The gene order in the different genomes analyzed is highly conserved,  
389 finding GU\_19737823 after the *rpsF::rpsR* operon and before *rplI*. *rpsF* and *rpsR* encode for  
390 30S ribosomal proteins, the prime target of spectinomycin. The combination of the experimental  
391 evidence and the associated data inferred by our approach provides strong support to generate  
392 the hypothesis that the gene AO356\_08590 might be involved in the resistance to  
393 spectinomycin.  
394

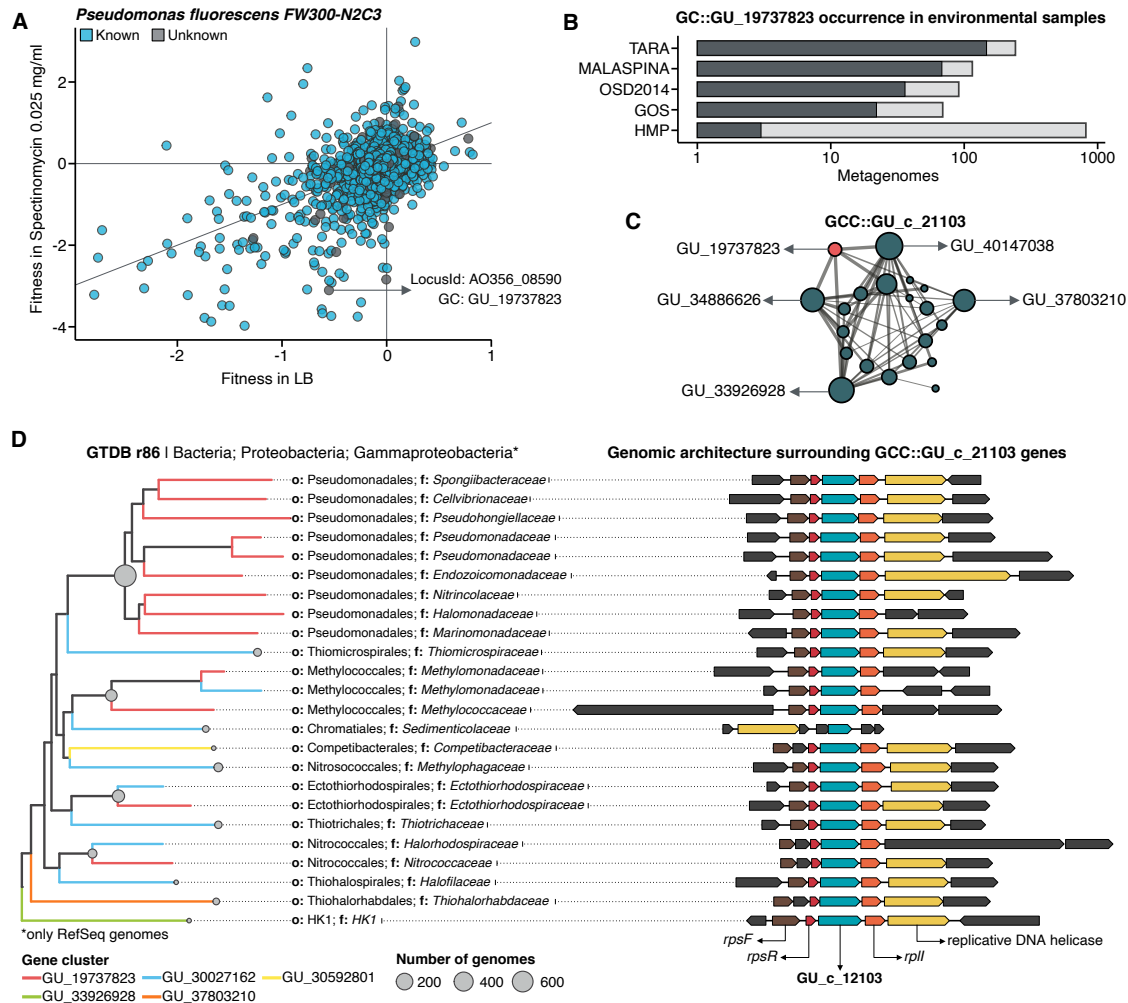

395  
 396  
 397  
 398  
 399  
 400  
 401  
 402  
 403  
 404  
 405  
 406  
 407  
 408  
 409  
 410  
 411  
 412

**Figure 6:** Augmenting experimental data with GCs of unknown function. (A) We used the fitness values from the experiments from Price et al. (Price et al., 2018) to identify genes of unknown function that are important for fitness under certain experimental conditions. The selected gene belongs to the genomic unknown GC GU\_19737823 and presents a strong phenotype (fitness = -3.1;  $t = -9.1$ ) (B) Occurrence of GU\_19737823 in the metagenomes used in this study. Darker bars depict the number of metagenomes where the GC is found. (C) GU\_19737823 is a member of the GCC GU\_c\_21103. The network shows the relationships between the different GCs members of the gene cluster community GU\_c\_21103. The size of the node corresponds to the node degree of each GC. Edge thickness corresponds to the bitscore/column metric. Highlighted in red is GU\_19737823. (D) We identified all the genes in the GTDB\_r86 genomes that belong to the GCC GU\_c\_21103 and explored their genomic neighborhoods. GU\_c\_21103 members were constrained to the class Gammaproteobacteria, and GU\_19737823 is mostly exclusive to the order Pseudomonadales. The gene order in the different genomes analyzed is highly conserved, finding GU\_19737823 after the *rpsF*::*rpsR* operon and before *rpII*. *rpsF* and *rpsR* encode for the 30S ribosomal protein S6 and 30S ribosomal protein S18, respectively. The GTDB\_r86 subtree only shows RefSeq genomes. Branch colors correspond to the different GCs found in GU\_c\_21103. The bubble plot depicts the number of genomes with a gene that belongs to GU\_c\_21103.

## 413 Discussion

414 We present a new conceptual framework and computational workflow to unify the known and  
415 unknown CDS-space. Using this framework, we performed an in-depth exploration of the  
416 microbial unknown CDS-space, demonstrating that we can link the unknown fraction of  
417 metagenomic studies to specific genomes and provide a powerful tool for hypothesis  
418 generation. During the last years, the microbiome community has established a standard  
419 operating procedure(Quince et al., 2017) for analyzing metagenomes that we can briefly  
420 summarize into (1) assembly, (2) gene prediction, (3) gene catalog inference, (4) binning, and  
421 (5) characterization. Thanks to recent computational developments (Steinegger & Soding, 2017;  
422 Steinegger & Söding, 2018), we envisioned an alternative to this workflow to maximize the  
423 information used when analyzing genomic and metagenomic data. In addition, we provide a  
424 mechanism to reconcile top-down and bottom-up approaches, thanks to the well-structured  
425 CDS-space proposed by our framework. AGNOSTOS can create environmental- and organism-  
426 specific variations of a seed GC database. Then, it integrates the predicted genes from new  
427 genomes and metagenomes and dynamically creates and classifies new GCs with those genes  
428 not integrated during the initial step (Fig. 1B). Afterward, the potential functions of the known  
429 GCs can be carefully characterized by incorporating them into the traditional workflows.

430 One of the most appealing characteristics of our approach is that the GCs provide unified  
431 groups of homologous genes across environments and organisms indifferently if they belong to  
432 the known or unknown CDS-space, and we can contextualize the unknown fraction using this  
433 genomic and environmental information. Our combination of partitioning and contextualization  
434 features a smaller unknown CDS-space than we expected. On average, for our genomic and  
435 metagenomic data, only 30% of the genes fall in the unknown fraction. One hypothesis to  
436 reconcile this surprising finding is that the methodologies to identify remotely homologous  
437 sequences in large datasets were computationally prohibitive until recently. New methods

438 (Steinegger, Meier, et al., 2019; Steinegger & Soding, 2017), like the ones used in AGNOSTOS,  
439 are enabling large scale distant homology searches. Still, one has to apply conservative  
440 measures to control the trade-off between specificity and sensitivity to avoid overclassification.  
441 We found that most of the coding sequence space at the gene and amino acid level is known,  
442 both in genomes and metagenomes. However, it presents a high diversity, as shown in the GC  
443 accumulation curves highlighting the vast remaining untapped microbial fraction and its potential  
444 importance for niche adaptation owing to its narrow ecological distribution. In a genomic context  
445 and after ruling out the effect of prophages, the unknown fraction is predominantly Species'  
446 lineage-specific and phylogenetically more conserved than the known fraction, supporting the  
447 signal observed in the environmental data emphasizing that we should not ignore the unknown  
448 fraction. It is worth noting that the high diversity observed in the unknowns only represents the  
449 20% of the amino acids in the CDS-space we analyzed, and only 10% of this unknown amino  
450 acid space is part of a Pfam domain (DUF and others). This contrasts with the numbers  
451 observed in the known CDS-space, where Pfam domains include 50% of the amino acids. All  
452 this evidence combined strengthens the hypothesis that the genes of unknown function,  
453 especially the lineage-specific ones, might be associated with the mechanisms of microbial  
454 diversification and niche adaptation due to the constant diversification of gene families and the  
455 survival of new gene lineages (Francino, 2012; Muller, 2019).

456 Metagenome-assembled genomes are not only unveiling new regions of the microbial universe  
457 (42% of the genomes in GTDB\_r86), but they are also enriching genes of unknown function in  
458 the tree of life. We investigated the unknown CDS-space of *Cand.* Patescibacteria, more  
459 commonly known as Candidate Phyla Radiation (CPR), a phylum that has raised considerable  
460 interest due to its unusual biology (Brown et al., 2015). We provide a collection of 54,343  
461 lineage-specific GCs of unknown function at different taxonomic level resolutions (Supp. Table  
462 12; Supp. Note 14), which will be a valuable resource for the CPR advancement research  
463 efforts.

464 Our effort to tackle the unknown provides a pathway to unlock a large pool of likely relevant data  
465 that remains untapped to analysis and discovery. By identifying a potential target gene of  
466 unknown function for antibiotic resistance, we demonstrate the value of our approach and how it  
467 can boost insights from model organism experiments. But severe challenges remain, such as  
468 the dependence on the quality of the assemblies and their gene predictions, as shown by the  
469 analysis of the ribosomal protein GCCs where many of the recovered genes are incomplete.  
470 While sequence assembly has been an active area of research (Roumpeka, Wallace,  
471 Escalettes, Fotheringham, & Watson, 2017), this has not been the case for gene prediction  
472 methods (Roumpeka et al., 2017), which are becoming outdated (Ivanova et al., 2014) and  
473 cannot cope with the current amount of data. Alternatives like protein-level assembly  
474 (Steinegger, Mirdita, & Söding, 2019) combined with exploring the assembly graphs'  
475 neighborhoods (Titus Brown et al., 2018) become very attractive for our purposes. In any case,  
476 we still face the challenge of discriminating between real and artifactual singletons (Höps,  
477 Jeffryes, & Bateman, 2018). There are currently no methods available to provide a plausible  
478 solution and, at the same time, being scalable. We devise a potential solution in the recent  
479 developments in unsupervised deep learning methods where they use large corpora of proteins  
480 to define a language model *embedding* for protein sequences (Heinzinger et al., 2019). These  
481 models could be applied to predict *embeddings* in singletons, which could be clustered or used  
482 to determine their coding potential. Another issue is that we might be creating more GCs than  
483 expected. We follow a conservative approach to avoid mixing multi-domain proteins in GCs  
484 owing to the fragmented nature of the metagenome assemblies that could result in the split of a  
485 GC. However, not only splitting can be a problem, but also lumping unrelated genes or GCs  
486 owing to the use of remote homologies. Although the inference of GCCs is using very sensitive  
487 methods to compare profile HMMs, low sequence diversity in GCs can limit its effectiveness.  
488 Moreover, our approach is affected by the presence and propagation of contamination in  
489 reference databases, a significant problem in 'omics (Breitwieser, Perteu, Zimin, & Salzberg,



490 2019; Steinegger & Salzberg, 2020). In our case, we only use Pfam as a source for annotation  
491 owing to its high-quality and manual curation process. The categorization process of our GCs  
492 depends on the information from other databases, and to minimize the potential impact of  
493 contamination, we apply methods that weight the annotations of the identified homologs to  
494 discriminate if a GC belongs to the known or unknown CDS-space.  
495 The results presented here prove that the integration and the analysis of the unknown fraction  
496 are possible. We are unveiling a brighter future, not only for microbiome analyses but also for  
497 boosting eukaryotic-related studies, thanks to the increasing number of projects, including  
498 metatranscriptomic data (Delmont et al., 2020; Vorobev et al., 2020). Furthermore, our work  
499 lays the foundations for further developments of clear guidelines and protocols to define the  
500 different levels of unknown (Thomas & Segata, 2019) and should encourage the scientific  
501 community for a collaborative effort to tackle this challenge.

## 502 Material and methods

### 503 Genomic and metagenomic dataset

504 We used a set of 583 marine metagenomes from four of the major metagenomic surveys of the  
505 ocean microbiome: Tara Oceans expedition (TARA) (Sunagawa et al., 2015), Malaspina  
506 expedition (Duarte, 2015), Ocean Sampling Day (OSD) (Kopf et al., 2015), and Global Ocean  
507 Sampling Expedition (GOS) (Rusch et al., 2007). We complemented this set with 1,246  
508 metagenomes obtained from the Human Microbiome Project (HMP) phase I and II (Lloyd-Price  
509 et al., 2017). We used the assemblies provided by TARA, Malaspina, OSD and HMP projects  
510 and the long Sanger reads from GOS (Sanger, Nicklen, & Coulson, 1977). A total of 156M  
511 (156,422,969) contigs and 12.8M long-reads were collected (Supp. Table 6).

512 For the genomic dataset, we used the 28,941 prokaryotic genomes (27,372 bacterial and 1,569  
513 archaeal) from the Genome Taxonomy Database (Parks et al., 2018) (GTDB) Release 03-RS86  
514 (19th August 2018).

## 515 Computational workflow development

516 We implemented a computation workflow based on Snakemake (Köster, 2018) for the easy  
517 processing of large datasets in a reproducible manner. The workflow provides three different  
518 strategies to analyze the data. The module *DB-creation* creates the gene cluster database,  
519 validates and partitions the gene clusters (GCs) in the main functional categories. The module  
520 *DB-update* allows the integration of new sequences (either at the contig or predicted gene level)  
521 in the existing gene cluster database. In addition, the workflow has a *profile-search* function to  
522 quickly screen samples using the gene cluster PSSM profiles in the database.

## 523 Metagenomic and genomic gene prediction

524 We used Prodigal (v2.6.3) (Hyatt et al., 2010) in metagenomic mode to predict the genes from  
525 the metagenomic dataset. For the genomic dataset, we used the gene predictions provided by  
526 Annotree (Mendler et al., 2019), since they were obtained, consistently, with Prodigal v2.6.3.  
527 We identified potential spurious genes using the *AntiFam* database (Eberhardt et al., 2012).  
528 Furthermore, we screened for ‘*shadow*’ genes using the procedure described in Yooseph et al.  
529 (Yooseph, Li, & Sutton, 2008).

## 530 PFAM annotation

531 We annotated the predicted genes using the *hmmsearch* program from the *HMMER* package  
532 (version: 3.1b2) (R. D. Finn, Clements, & Eddy, 2011) in combination with the Pfam database  
533 v31 (Robert D. Finn et al., 2016). We kept the matches exceeding the internal gathering

534 threshold and presenting an independent e-value  $< 1e-5$  and coverage  $> 0.4$ . In addition, we  
535 took into account multi-domain annotations, and we removed overlapping annotations when the  
536 overlap is larger than 50%, keeping the ones with the smaller e-value.

## 537 Determination of the gene clusters

538 We clustered the metagenomic predicted genes using the cascaded-clustering workflow of the  
539 MMseqs2 software (Steinegger & Söding, 2018) (“*--cov-mode 0 -c 0.8 --min-seq-id 0.3*”). We  
540 discarded from downstream analyses the singletons and clusters with a size below a threshold  
541 identified after applying a broken-stick model (Bennett, 1996). We integrated the genomic data  
542 into the metagenomic cluster database using the “DB-update” module of the workflow. This  
543 module uses the *clusterupdate* module of MMseqs2 (Steinegger & Soding, 2017), with the same  
544 parameters used for the metagenomic clustering.

## 545 Quality-screening of gene clusters

546 We examined the GCs to ensure their high intra-cluster homogeneity. We applied two  
547 methodologies to validate their cluster sequence composition and functional annotation  
548 homogeneity. We identified non-homologous sequences inside each cluster combining the  
549 identification of a new cluster representative sequence via a sequence similarity network (SSN)  
550 analysis, and the investigation of intra-cluster multiple sequence alignments (MSAs), given the  
551 new representative. Initially, we generated an SSN for each cluster, using the semi-global  
552 alignment methods implemented in *PARASAIL* (Daily, 2016) (version 2.1.5). We trimmed the  
553 SSN using a custom algorithm (Chafee et al., 2018; Žure, Fernandez-Guerra, Munn, & Harder,  
554 2017) that removes edges while maintaining the network structural integrity and obtaining the  
555 smallest connected graph formed by a single component. Finally, the new cluster representative  
556 was identified as the most central node of the trimmed SSN by the eigenvector centrality  
557 algorithm, as implemented in *igraph* (Csardi & Nepusz, 2006). After this step, we built a multiple

558 sequence alignment for each cluster using *FAMSA* (Deorowicz, Debudaj-Grabysz, & Gudyś,  
559 2016) (version 1.1). Then, we screened each cluster-MSA for non-homologous sequences to  
560 the new cluster representative. Owing to computational limitations, we used two different  
561 approaches to evaluate the cluster-MSAs. We used *LEON-BIS* (Vanhoutreve et al., 2016) for  
562 the clusters with a size ranging from 10 to 1,000 genes and OD-SEQ (Jehl, Sievers, & Higgins,  
563 2015) for the clusters with more than 1,000 genes. In the end, we applied a broken-stick model  
564 (Bennett, 1996) to determine the threshold to discard a cluster.

565 The predicted genes can have multi-domain annotations in different orders, therefore to validate  
566 the consistency of intra-cluster Pfam annotations, we applied a combination of w-shingling  
567 (Broder, 1997) and Jaccard similarity. We used w-shingling (k-shingle = 2) to group consecutive  
568 domain annotations as a single object. We measured the homogeneity of the *shingle sets* (sets  
569 of domains) between genes using the Jaccard similarity and reported the median similarity  
570 value for each cluster. Moreover, we took into consideration the Clan membership of the Pfam  
571 domains and that a gene might contain N-, C- and M-terminal domains for the functional  
572 homogeneity validation. We discarded clusters with a median similarity < 1.

573 After the validation, we refined the gene cluster database removing the clusters identified to be  
574 discarded and the clusters containing  $\geq 30\%$  *shadow genes*. Lastly, we removed the single  
575 shadow, spurious and non-homologous genes from the remaining clusters (Supplementary Note  
576 2).

## 577 Remote homology classification of gene clusters

578 To partition the validated GCs into the four main categories, we processed the set of GCs  
579 containing Pfam annotated genes and the set of not annotated GCs separately. For the  
580 annotated GCs, we inferred a consensus protein domain architecture (DA) (an ordered  
581 combination of protein domains) for each annotated gene cluster. To identify each gene cluster  
582 consensus DA, we created directed acyclic graphs connecting the Pfam domains based on their

583 topological order on the genes using *igraph* (Csardi & Nepusz, 2006). We collapsed the  
584 repetitions of the same domain. Then we used the gene completeness as a positive-weighting  
585 value for the selection of the cluster consensus DA. Within this step, we divided the GCs into  
586 “Knowns” (Known) if annotated to at least one Pfam domains of known function (DKFs) and  
587 “Genomic unknowns” (GU) if annotated entirely to Pfam domains of unknown function (DUFs).  
588 We aligned the sequences of the non-annotated GCs with FAMSA (Deorowicz et al., 2016) and  
589 obtained cluster consensus sequences with the *hhconsensus* program from *HH-SUITE*  
590 (Steinegger, Meier, et al., 2019). We used the cluster consensus sequences to perform a  
591 nested search against the UniRef90 database (release 2017\_11) (The UniProt Consortium,  
592 2017) and NCBI *nr* database (release 2017\_12) (NCBI Resource Coordinators, 2018) to retrieve  
593 non-Pfam annotations with *MMSeqs2* (Steinegger & Soding, 2017) (“-e 1e-05 --cov-mode 2 -c  
594 0.6”). We kept the hits within 60% of the Log(best-e-value) and searched the annotations for  
595 any of the terms commonly used to define proteins of unknown function (Supp. Table 12). We  
596 used a quorum majority voting approach to decide if a gene cluster would be classified as  
597 *Genomic Unknown* or *Known without Pfams* based on the annotations retrieved. We searched  
598 the consensus sequences without any homologs in the UniRef90 database against NCBI *nr*. We  
599 applied the same approach and criteria described for the first search. Ultimately, we classified  
600 as *Environmental Unknown* those GCs whose consensus sequences did not align with any of  
601 the NCBI *nr* entries.

602 In addition, we developed some conservative measures to control the trade-off between  
603 specificity and sensitivity for the remote homology searches such as (1) a modification of the  
604 algorithm described in Hingamp et al. (Hingamp et al., 2013) to get a confident group of  
605 homologs to determine if a query protein is known or unknown by a quorum majority voting  
606 approach (Supp Note 3); (2) strict parameters in terms of iterations, bidirectional coverage and  
607 probability thresholds for the HHblits alignments to minimize the inclusion of non-homologous

608 sequences; and (3) avoid providing annotations for our gene clusters, as we believe that  
609 annotation should be a careful process done on a smaller scale and with experimental context.

## 610 Gene cluster remote homology refinement

611 We refined the *Environmental Unknown* GCs to ensure the lack of any characterization by  
612 searching for remote homologies in the Uniclust database (release 30\_2017\_10) using the  
613 HMM/HMM alignment method *HHblits* (Remmert, Biegert, Hauser, & Söding, 2012). We created  
614 the HMM profiles with the *hmmake* program from the *HH-SUITE* (Steinegger, Meier, et al.,  
615 2019). We only accepted those hits with an *HHblits-probability*  $\geq 90\%$  and we re-classified them  
616 following the same majority vote approach as previously described. The clusters with no hits  
617 remained as the refined set of EUs. We applied a similar refinement approach to the KWP  
618 clusters to identify GCs with remote homologies to Pfam protein domains. The KWP HMM  
619 profiles were searched against the Pfam *HH-SUITE* database (version 31), using *HHblits*. We  
620 accepted hits with a probability  $\geq 90\%$  and a target coverage  $> 60\%$  and removed overlapping  
621 domains as described earlier. We moved the KWP with remote homologies to known Pfams to  
622 the Known set, and those showing remote homologies to Pfam DUFs to the GUs. The clusters  
623 with no hits remained as the refined set of KWP.

## 624 Gene cluster characterization

625 To retrieve the taxonomic composition of our clusters we applied the *MMseqs2 taxonomy*  
626 program (version: b43de8b7559a3b45c8e5e9e02cb3023dd339231a), which allows computing  
627 the lowest common ancestor through the implementation of the 2bLCA protocol (Hingamp et al.,  
628 2013). We searched all cluster genes against UniProtKB (release of January 2018) (UniProt  
629 Consortium, 2018) using the following parameters “*-e 1e-05 --cov-mode 0 -c 0.6*”. We parsed  
630 the results to keep only the hits within 60% of the  $\log_{10}(\text{best-e-value})$ . To retrieve the taxonomic  
631 lineages, we used the R package *CHNOSZ* (Dick, 2008). We measured the intra-cluster

632 taxonomic admixture by applying the *entropy.empirical()* function from the *entropy* R package  
633 (Hausser & Strimmer, 2008). This function estimates the Shannon entropy based on the  
634 different taxonomic annotation frequencies. For each cluster, we also retrieved the cluster  
635 consensus taxonomic annotation, which we defined as the taxonomic annotation of the majority  
636 of the genes in the cluster.  
637 In addition to the taxonomy, we evaluated the clusters' level of darkness and disorder using the  
638 Dark Proteome Database (DPD) (Perdigão et al., 2017) as reference. We searched the cluster  
639 genes against the DPD, applying the MMseqs2 search program (Steinegger & Soding, 2017)  
640 with “*-e 1e-20 --cov-mode 0 -c 0.6*”. For each cluster, we then retrieved the mean and the  
641 median level of darkness, based on the gene DPD annotations.

## 642 High-quality clusters

643 We defined a subset of high-quality clusters based on the completeness of the cluster genes  
644 and their representatives. We identified the minimum required percentage of complete genes  
645 per cluster by a broken-stick model (Bennett, 1996) applied to the percentage distribution. Then,  
646 we selected the GCs found above the threshold and with a complete representative.

## 647 A set of non-redundant domain architectures

648 We estimated the number of potential domain architectures present in the *Known* GCs taking  
649 into account the large proportion of fragmented genes in the metagenomic dataset and that  
650 could inflate the number of potential domain architectures. To identify fragments of larger  
651 domain architecture, we took into account their topological order in the genes. To reduce the  
652 number of comparisons, we calculated the pairwise string cosine distance (q-gram = 3) between  
653 domain architectures and discarded the pairs that were too divergent (cosine distance  $\geq 0.9$ ).  
654 We collapsed a fragmented domain architecture to the larger one when it contained less than  
655 75% of complete genes.

## 656 Inference of gene cluster communities

657 We aggregated distant homologous GCs into GCCs. The community inference approach  
658 combined an all-vs-all HMM gene cluster comparison with Markov Cluster Algorithm (MCL) (van  
659 Dongen & Abreu-Goodger, 2012) community identification. We started performing the inference  
660 on the Known GCs to use the Pfam DAs as constraints. We aligned the gene cluster HMMs  
661 using HHblits (Remmert et al., 2012) (-n 2 -Z 10000000 -B 10000000 -e 1) and we built a  
662 homology graph using the cluster pairs with probability  $\geq 50\%$  and bidirectional coverage  $> 60\%$ .  
663 We used the ratio between HHblits-bitscore and aligned-columns as the edge weights (Supp.  
664 Note 9). We used MCL (van Dongen & Abreu-Goodger, 2012) (v. 12-068) to identify the  
665 communities present in the graph. We developed an iterative method to determine the optimal  
666 MCL inflation parameter that tries to maximize the relationship of five intra-/inter-community  
667 properties: (1) the proportion of MCL communities with one single DA, based on the consensus  
668 DAs of the cluster members; (2) the ratio of MCL communities with more than one cluster; (3)  
669 the proportion of MCL communities with a PFAM clan entropy equal to 0; (4) the intra-  
670 community HHblits-score/Aligned-columns score (normalized by the maximum value); and (5)  
671 the number of MCL communities, which should, in the end, reflect the number of non-redundant  
672 DAs. We iterated through values ranging from 1.2 to 3.0, with incremental steps of 0.1. During  
673 the inference process, some of the GCs became orphans in the graph. We applied a three-step  
674 approach to assigning a community membership to these GCs. First, we used less stringent  
675 conditions (probability  $\geq 50\%$  and coverage  $\geq 40\%$ ) to find homologs in the already existing  
676 GCCs. Then, we ran a second iteration to find secondary relationships between the newly  
677 assigned GCs and the missing ones. Lastly, we created new communities with the remaining  
678 GCs. We repeated the whole process with the other categories (KWP, GU and EU), applying  
679 the optimal inflation value found for the Known (2.2 for metagenomic and 2.5 for genomic data).



## 680 Gene cluster communities validation

681 We tested the biological significance of the GCCs using the phylogeny of proteorhodopsin  
682 (Boeuf et al., 2015) (PR). We used the proteorhodopsin HMM profiles (Olson et al., 2018) to  
683 screen the marine metagenomic datasets using *hmmsearch* (version 3.1b2) (R. D. Finn et al.,  
684 2011). We kept the hits with a coverage > 0.4 and e-value <= 1e-5. We removed identical  
685 duplicates from the sequences assigned to PR with CD-HIT (W. Li & Godzik, 2006) (v4.6) and  
686 cleaned from sequences with less than 100 amino acids. To place the identified PR sequences  
687 into the MicRhode (Boeuf et al., 2015) PR tree first, we optimized the initial tree parameters and  
688 branch lengths with RAxML (v8.2.12) (Stamatakis, 2014). We used PaPaRA (v2.5) (Berger &  
689 Stamatakis, 2012) to incrementally align the query PR sequences against the MicRhode PR  
690 reference alignment and *pplacer* (Matsen, Kodner, & Armbrust, 2010) (v1.1.alpha19-0-g807f6f3)  
691 to place the sequences into the tree. Finally, we assigned the query PR sequences to the  
692 MicRhode PR Superclusters based on the phylogenetic placement. We further investigated the  
693 GCs annotated as viral (196 genes, 14 GC) comparing them to the six newly discovered viral  
694 PRs (Needham et al., 2019) using Parasail (Daily, 2016) (-a sg\_stats\_scan\_sse2\_128\_16 -t 8 -c  
695 1 -x). As an additional evaluation, we investigated the distributions of standard GCCs and HQ  
696 GCCs within ribosomal protein families. We obtained the ribosomal proteins used for the  
697 analysis combining the set of 16 ribosomal proteins from Méheust et al. (Méheust et al., 2019)  
698 and those contained in the collection of bacterial single-copy genes of Anvi'o (Murat Eren et al.,  
699 2015). Also, for the ribosomal proteins, we compared the outcome of our method to the one  
700 proposed by Méheust et al. (Méheust et al., 2019) (Supp. Note 9).

## 701 Metagenomic sample selection for downstream analyses

702 For the subsequent ecological analyses, we selected those metagenomes with a number of  
703 genes larger or equal to the first quartile of the distribution of all the metagenomic gene counts.  
704 (Supp. Table 13).

## 705 Gene cluster abundance profiles in genomes and metagenomes

706 We estimated abundance profiles for the metagenomic cluster categories using the read  
707 coverage to each predicted gene as a proxy for abundance. We calculated the coverage by  
708 mapping the reads against the assembly contigs using the *bwa-mem* algorithm from *BWA*  
709 *mapper* (H. Li & Durbin, 2010). Then, we used *BEDTOOLS* (Quinlan & Hall, 2010), to find the  
710 intersection of the gene coordinates to the assemblies, and normalize the per-base coverage by  
711 the length of the gene. We calculated the cluster abundance in a sample as the sum of the  
712 cluster gene abundances in that sample, and the cluster category abundance in a sample as the  
713 sum of the cluster abundances. We obtained the proportions of the different gene cluster  
714 categories applying a total-sum-scaling normalization. For the genomic abundance profiles, we  
715 used the number of genes in the genomes and normalized by the total gene counts per  
716 genome.

## 717 Rate of genomic and metagenomic gene clusters accumulation

718 We calculated the cumulative number of known and unknown GCs as a function of the number  
719 of metagenomes and genomes. For each metagenome count, we generated 1000 random sets,  
720 and we calculated the number of GCs and GCCs recovered. For this analysis, we used 1,246  
721 HMP metagenomes and 358 marine metagenomes (242 from TARA and 116 from Malaspina).  
722 We repeated the same procedure for the genomic dataset. We removed the singletons from the  
723 metagenomic dataset with an abundance smaller than the mode abundance of the singletons

724 that got reclassified as good-quality clusters after integrating the GTDB data to minimize the  
725 impact of potential spurious singletons. To complement those analyses, we evaluated the  
726 coverage of our dataset by searching seven different state-of-the-art databases against our set  
727 of metagenomic GC HMM profiles (Supp. Note 12).

728

## 729 Occurrence of gene clusters in the environment

730 We used 1,264 metagenomes from the TARA Oceans, MALASPINA Expedition, OSD2014 and  
731 HMP-I/II to explore the properties of the unknown CDS-space in the environment. We applied  
732 the Levins Niche Breadth (NB) index (Levins, 1966) to investigate the GCs and GCCs  
733 environmental distributions. We removed the GCs and cluster communities with a mean relative  
734 abundance  $< 1e-5$ . We followed a divide-and-conquer strategy to avoid the computational  
735 burden of generating the null-models to test the significance of the distributions owing to the  
736 large number of metagenomes and GCs. First, we grouped similar samples based on the gene  
737 cluster content using the Bray-Curtis dissimilarity (Bray, Roger Bray, & Curtis, 1957) in  
738 combination with the *Dynamic Tree Cut* (Langfelder, Zhang, & Horvath, 2008) R package. We  
739 created 100 random datasets picking up one random sample from each group. For each of the  
740 100 random datasets, we created 100 random abundance matrices using the *nullmodel* function  
741 of the *quasiswap* count method (Miklós & Podani, 2004). Then we calculated the *observed* NB  
742 and obtained the 2.5% and 97.5% quantiles based on the randomized sets. We compared the  
743 observed and quantile values for each gene cluster and defined it to have a *Narrow distribution*  
744 when the *observed* was smaller than the 2.5% quantile and to have a *Broad distribution* when it  
745 was larger than the 97.5% quantile. Otherwise, we classified the cluster as *Non-significant*  
746 (Salazar et al., 2015). We used a majority voting approach to get a consensus distribution  
747 classification based on the ten random datasets.

## 748 Identification of prophages in genomic sequences

749 We used PhageBoost (<https://github.com/ku-cbd/PhageBoost/>) to find gene regions in the  
750 microbial genomes that result in high viral signals against the overall genome signal. We set the  
751 following thresholds to consider a region prophage: minimum of 10 genes, maximum 5 gaps,  
752 single-gene probability threshold 0.9. We further smoothed the predictions using Parzen rolling  
753 windows of 20 periods and looked at the smoothed probability distribution across the genome.  
754 We disregarded regions that had a summed smoothed probability less than 0.5, and those  
755 regions that did differ from the overall population of the genes in a genome by using Kruskal–  
756 Wallis rank test (p-value 0.001).

## 757 Lineage-specific gene clusters

758 We used the F1-score developed for AnnoTree (Mendler et al., 2019) to identify the lineage-  
759 specific GCs and to which rank they are specific. Following similar criteria to the ones used in  
760 Mendler et al. (Mendler et al., 2019), we considered a gene cluster to be lineage-specific if it is  
761 present in less than half of all genomes and at least 2 with F1-score > 0.95.

## 762 Phylogenetic conservation of gene clusters

763 We calculated the phylogenetic conservation ( $\tau$ D) of each gene cluster using the *consenTRAIT*  
764 (Martiny et al., 2013) function implemented in the R package *castor* (Martiny et al., 2013). We  
765 used a paired Wilcoxon rank-sum test to compare the average  $\tau$ D values for lineage-specific  
766 and non-specific GCs.

## 767 Evaluation of the OM-RGC v2 uncharacterized fraction

768 We integrated the 46,775,154 genes from the second version of the TARA Ocean Microbial  
769 Reference Gene Catalog (OM-RGC v2) (Salazar et al., 2019) into our cluster database using

770 the same procedure as for the genomic data. We evaluated the uncharacterized fraction and the  
771 genes classified into the eggNOG (Huerta-Cepas et al., 2019) category S within the context of  
772 our database.

## 773 Augmenting RB-TnSeq experimental data

774 We searched the 37,684 genes of unknown function associated with mutant phenotypes from  
775 Price et al. (Price et al., 2018) against our gene cluster profiles. We kept the hits with e-value  $\leq$   
776  $1e-20$  and a query coverage  $> 60\%$ . Then we filtered the results to keep the hits within 90% of  
777 the Log(best-e-value), and we used a majority vote function to retrieve the consensus category  
778 for each hit. Lastly, we selected the best-hits based on the smallest e-value and the largest  
779 query and target coverage values. We used the fitness values from the RB-TnSeq experiments  
780 from Price et al. to identify genes of unknown function that are important for fitness under  
781 certain experimental conditions.

## 782 Availability of data and materials

783 The code used for the analyses in the manuscript is available at [https://github.com/functional-](https://github.com/functional-dark-side/functional-dark-side.github.io/tree/master/scripts)  
784 [dark-side/functional-dark-side.github.io/tree/master/scripts](https://github.com/functional-dark-side/functional-dark-side.github.io/tree/master/scripts). The code to recreate the figures is  
785 available at [https://github.com/functional-dark-side/vanni\\_et\\_al-figures](https://github.com/functional-dark-side/vanni_et_al-figures). Detailed descriptions of  
786 the different methods and results of this manuscript are available at  
787 <https://dark.metagenomics.eu>. The workflow AGNOSTOS is available at  
788 <https://github.com/functional-dark-side/agnostos-wf>, and its database can be downloaded from  
789 <https://doi.org/10.6084/m9.figshare.12459056>.

790

791

## 792 Acknowledgements

793 The authors thankfully acknowledge the computer resources at MareNostrum and the technical  
794 support provided by Barcelona Supercomputing Center (RES-AECT-2014-2-0085), the BMBF-  
795 funded de.NBI Cloud within the German Network for Bioinformatics Infrastructure (de.NBI)  
796 (031A537B, 031A533A, 031A538A, 031A533B, 031A535A, 031A537C, 031A534A, 031A532B),  
797 the University of Oxford Advanced Research Computing  
798 (<http://dx.doi.org/10.5281/zenodo.22558>) and the MARBITS bioinformatics core at ICM-CSIC.  
799 CV was supported by the Max Planck Society. AFG received funding from the European  
800 Union's Horizon 2020 research and innovation program Blue Growth: Unlocking the potential of  
801 Seas and Oceans under grant agreement no. 634486 (project acronym INMARE). AM was  
802 supported by the Biotechnology and Biological Sciences Research Council [BB/M011755/1,  
803 BB/R015228/1] and RDF by the European Molecular Biology Laboratory core funds. EOC was  
804 supported by project INTERACTOMA RTI2018-101205-B-I00 from the Spanish Agency of  
805 Science MICIU/AEI. SGA and PS received additional funding by the project MAGGY  
806 (CTM2017-87736-R) from the Spanish Ministry of Economy and Competitiveness. The  
807 Malaspina 2010 Expedition was supported by the Spanish Ministry of Economy and  
808 Competitiveness (MINECO) through the Consolider-Ingenio program (ref. CSD2008-00077).  
809 The authors thank Johannes Söding and Alex Bateman for helpful discussions.

810

## 811 Contributions

812 CV, MSS and AF-G performed the analyses and wrote the computational workflow. MS assisted  
813 with the clustering and remote homology searches. KS helped with the identification of  
814 prophages in genomic sequences. PLB and AB provided feedback and assisted with the  
815 ecological analyses. RDF and AM provided feedback and information on the MGnify and Pfam

816 databases. CMD, PS and SGA provided the Malaspina metagenomes. TOD and AME analyzed  
817 data in the context of metagenome-assembled genomes. AF-G conceived the study and  
818 supervised the work. CV and AF-G wrote the manuscript. All authors read, edited and approved  
819 the final manuscript.

## 820 **Competing Interests**

821 The authors declare no competing interests.

## 822 References

- 823 Almeida, A., Mitchell, A. L., Boland, M., Forster, S. C., Gloor, G. B., Tarkowska, A., ... Finn, R.  
824 D. (2019). A new genomic blueprint of the human gut microbiota. *Nature*, 568(7753),  
825 499–504.
- 826 Almeida, A., Nayfach, S., Boland, M., Strozzi, F., Beracochea, M., Shi, Z. J., ... Finn, R. D.  
827 (2020). A unified catalog of 204,938 reference genomes from the human gut  
828 microbiome. *Nature Biotechnology*. doi:10.1038/s41587-020-0603-3
- 829 Anantharaman, K., Hausmann, B., Jungbluth, S. P., Kantor, R. S., Lavy, A., Warren, L. A., ...  
830 Banfield, J. F. (2018). Expanded diversity of microbial groups that shape the  
831 dissimilatory sulfur cycle. *The ISME Journal*, 12(7), 1715–1728.
- 832 Arnold, F. H. (1998). Design by Directed Evolution. *Accounts of Chemical Research*, 31(3),  
833 125–131.
- 834 Arnold, F. H. (2018). Directed Evolution: Bringing New Chemistry to Life. *Angewandte Chemie* ,  
835 57(16), 4143–4148.
- 836 Bateman, A., Coggill, P., & Finn, D. R. (2010). DUFs: Families in search of function. *Acta*  
837 *Crystallographica. Section F, Structural Biology and Crystallization Communications*,  
838 66(10), 1148–1152.
- 839 Bennett, K. D. (1996). Determination of the number of zones in a biostratigraphical sequence.  
840 *The New Phytologist*, 132(1), 155–170.
- 841 Berger, S. A., & Stamatakis, A. (2012). PaPaRa 2.0: a vectorized algorithm for probabilistic  
842 phylogeny-aware alignment extension. *Heidelberg Institute for Theoretical Studies*,  
843 [Http://Sco.h-its.Org/Exelixis/Publications.Html.Exelixis-RRDR-2012-2015](http://Sco.h-its.Org/Exelixis/Publications.Html.Exelixis-RRDR-2012-2015). Retrieved  
844 from <https://cme.h-its.org/exelixis/pubs/Exelixis-RRDR-2012-5.pdf>
- 845 Bernard, G., Pathmanathan, J. S., Lannes, R., Lopez, P., & Baptiste, E. (2018). Microbial Dark  
846 Matter Investigations: How Microbial Studies Transform Biological Knowledge and



- 847 Empirically Sketch a Logic of Scientific Discovery. *Genome Biology and Evolution*, 10(3),  
848 707–715.
- 849 Bileschi, M. L., Belanger, D., Bryant, D., Sanderson, T., Carter, B., Sculley, D., ... Colwell, L. J.  
850 (2019). Using Deep Learning to Annotate the Protein Universe (p. 626507).  
851 doi:10.1101/626507
- 852 Bitard-Feildel, T., & Callebaut, I. (2017). Exploring the dark foldable proteome by considering  
853 hydrophobic amino acids topology. *Scientific Reports*, 7, 41425.
- 854 Boeuf, D., Audic, S., Brillet-Guéguen, L., Caron, C., & Jeanthon, C. (2015). MicRhoDE: a  
855 curated database for the analysis of microbial rhodopsin diversity and evolution.  
856 *Database: The Journal of Biological Databases and Curation*, 2015.  
857 doi:10.1093/database/bav080
- 858 Brandenberg, O. F., Fasan, R., & Arnold, F. H. (2017). Exploiting and engineering hemoproteins  
859 for abiological carbene and nitrene transfer reactions. *Current Opinion in Biotechnology*,  
860 47, 102–111.
- 861 Bray, J. R., Roger Bray, J., & Curtis, J. T. (1957). An Ordination of the Upland Forest  
862 Communities of Southern Wisconsin. *Ecological Monographs*, Vol. 27, pp. 325–349.  
863 doi:10.2307/1942268
- 864 Breitwieser, F. P., Perteua, M., Zimin, A., & Salzberg, S. L. (2019). Human contamination in  
865 bacterial genomes has created thousands of spurious proteins. *Genome Research*.  
866 doi:10.1101/gr.245373.118
- 867 Broder, A. Z. (1997). On the resemblance and containment of documents. *Proceedings.*  
868 *Compression and Complexity of SEQUENCES 1997 (Cat. No. 97TB100171)*, 21–29.  
869 IEEE.
- 870 Brown, C. T., Hug, L. A., Thomas, B. C., Sharon, I., Castelle, C. J., Singh, A., ... Banfield, J. F.  
871 (2015). Unusual biology across a group comprising more than 15% of domain Bacteria.  
872 *Nature*, 523(7559), 208–211.

- 873 Brum, J. R., Cesar Ignacio-Espinoza, J., Kim, E.-H., Trubl, G., Jones, R. M., Roux, S., ...  
874 Sullivan, M. B. (2016). Illuminating structural proteins in viral “dark matter” with  
875 metaproteomics. *Proceedings of the National Academy of Sciences of the United States*  
876 *of America*, 113(9), 2436–2441.
- 877 Buttigieg, L. P., Hankeln, W., Kostadinov, I., Kottmann, R., Yilmaz, P., Duhaime, B. M., &  
878 GI??ckner, O. F. (2013). Ecogenomic Perspectives on Domains of Unknown Function:  
879 Correlation-Based Exploration of Marine Metagenomes. *PLoS One*, 8(3).
- 880 Carradec, Q., Pelletier, E., Da Silva, C., Alberti, A., Seeleuthner, Y., Blanc-Mathieu, R., ...  
881 Wincker, P. (2018). A global ocean atlas of eukaryotic genes. *Nature Communications*,  
882 9(1), 373.
- 883 Chafee, M., Fernández-Guerra, A., Buttigieg, P. L., Gerdts, G., Eren, A. M., Teeling, H., &  
884 Amann, R. I. (2018). Recurrent patterns of microdiversity in a temperate coastal marine  
885 environment. *The ISME Journal*, 12(1), 237–252.
- 886 Chen, I.-M. A., Chu, K., Palaniappan, K., Pillay, M., Ratner, A., Huang, J., ... Kyrpides, N. C.  
887 (2019). IMG/M v.5.0: an integrated data management and comparative analysis system  
888 for microbial genomes and microbiomes. *Nucleic Acids Research*, 47(D1), D666–D677.
- 889 Cross, K. L., Campbell, J. H., Balachandran, M., Campbell, A. G., Cooper, S. J., Griffen, A., ...  
890 Podar, M. (2019). Targeted isolation and cultivation of uncultivated bacteria by reverse  
891 genomics. *Nature Biotechnology*, 37(11), 1314–1321.
- 892 Csardi, G., & Nepusz, T. (2006). The igraph software package for complex network research.  
893 *InterJournal*, p. 1695. Retrieved from <http://igraph.org>
- 894 Daily, J. (2016). Parasail: SIMD C library for global, semi-global, and local pairwise sequence  
895 alignments. *BMC Bioinformatics*, 17(1), 81–81.
- 896 Delmont, T. O., Gaia, M., Hinsinger, D. D., Fremont, P., Guerra, A. F., Murat Eren, A., ... Jaillon,  
897 O. (2020). Functional repertoire convergence of distantly related eukaryotic plankton  
898 lineages revealed by genome-resolved metagenomics (p. 2020.10.15.341214).

- 899           doi:10.1101/2020.10.15.341214
- 900   Deorowicz, S., Debudaj-Grabysz, A., & Gudyś, A. (2016). FAMSA: Fast and accurate multiple  
901           sequence alignment of huge protein families. *Scientific Reports*, 6(1), 33964–33964.
- 902   Dick, J. M. (2008). Calculation of the relative metastabilities of proteins using the CHNOSZ  
903           software package. *Geochemical Transactions*, 9, 10.
- 904   Duarte, C. M. (2015). Seafaring in the 21st Century: The Malaspina 2010 Circumnavigation  
905           Expedition. *Limnology and Oceanography Bulletin*, 24(1), 11–14.
- 906   Dubinkina, V. B., Ischenko, D. S., Ulyantsev, V. I., Tyakht, A. V., & Alexeev, D. G. (2016).  
907           Assessment of k-mer spectrum applicability for metagenomic dissimilarity analysis. *BMC*  
908           *Bioinformatics*, Vol. 17. doi:10.1186/s12859-015-0875-7
- 909   Eberhardt, R. Y., Haft, D. H., Punta, M., Martin, M., O'Donovan, C., & Bateman, A. (2012).  
910           AntiFam: a tool to help identify spurious ORFs in protein annotation. *Database*, 2012(0),  
911           bas003–bas003.
- 912   Edwards, R. A., Vega, A. A., Norman, H. M., Ohaeri, M., Levi, K., Dinsdale, E. A., ... Dutilh, B.  
913           E. (2019). Global phylogeography and ancient evolution of the widespread human gut  
914           virus crAssphage. *Nature Microbiology*, 4(10), 1727–1736.
- 915   Eloe-Fadrosh, E. A., Paez-Espino, D., Jarett, J., Dunfield, P. F., Hedlund, B. P., Dekas, A. E., ...  
916           Ivanova, N. N. (2016). Global metagenomic survey reveals a new bacterial candidate  
917           phylum in geothermal springs. *Nature Communications*, 7, 10476.
- 918   Finn, R. D., Clements, J., & Eddy, S. R. (2011). HMMER web server: interactive sequence  
919           similarity searching. *Nucleic Acids Research*, 39(suppl), W29–W37.
- 920   Finn, Robert D., Coggill, P., Eberhardt, R. Y., Eddy, S. R., Mistry, J., Mitchell, A. L., ... Bateman,  
921           A. (2016). The Pfam protein families database: towards a more sustainable future.  
922           *Nucleic Acids Research*, 44(D1), D279–D285.
- 923   Francino, M. P. (2012). The ecology of bacterial genes and the survival of the new. *International*  
924           *Journal of Evolutionary Biology*, 2012, 394026.

- 925 Franzosa, E. A., McIver, L. J., Rahnavard, G., Thompson, L. R., Schirmer, M., Weingart, G., ...  
926 Huttenhower, C. (2018). Species-level functional profiling of metagenomes and  
927 metatranscriptomes. *Nature Methods*, 15(11), 962–968.
- 928 Habchi, J., Tompa, P., Longhi, S., & Uversky, V. N. (2014). Introducing protein intrinsic disorder.  
929 *Chemical Reviews*, 114(13), 6561–6588.
- 930 Hanson, A. D., Pribat, A., Waller, J. C., & Crécy-Lagard, V. de. (2010). ‘Unknown’ proteins and  
931 ‘orphan’ enzymes: the missing half of the engineering parts list--and how to find it.  
932 *Biochemical Journal*, 425(1), 1–11.
- 933 Hausser, J., & Strimmer, K. (2008). Entropy inference and the James-Stein estimator, with  
934 application to nonlinear gene association networks. Retrieved from  
935 <http://arxiv.org/abs/0811.3579>
- 936 Heffernan, B., Murphy, C. D., & Casey, E. (2009). Comparison of planktonic and biofilm cultures  
937 of *Pseudomonas fluorescens* DSM 8341 cells grown on fluoroacetate. *Applied and*  
938 *Environmental Microbiology*, 75(9), 2899–2907.
- 939 Heinzinger, M., Elnaggar, A., Wang, Y., Dallago, C., Nechaev, D., Matthes, F., & Rost, B.  
940 (2019). Modeling aspects of the language of life through transfer-learning protein  
941 sequences. *BMC Bioinformatics*, 20(1), 723.
- 942 Hingamp, P., Grimsley, N., Acinas, S. G., Clerissi, C., Subirana, L., Poulain, J., ... Ogata, H.  
943 (2013). Exploring nucleo-cytoplasmic large DNA viruses in Tara Oceans microbial  
944 metagenomes. *The ISME Journal*, 7(9), 1678–1695.
- 945 Höps, W., Jeffryes, M., & Bateman, A. (2018). Gene Unprediction with Spurio: A tool to identify  
946 spurious protein sequences. *F1000Research*, 7, 261.
- 947 Huerta-Cepas, J., Forslund, K., Coelho, L. P., Szklarczyk, D., Jensen, L. J., von Mering, C., &  
948 Bork, P. (2017). Fast Genome-Wide Functional Annotation through Orthology  
949 Assignment by eggNOG-Mapper. *Molecular Biology and Evolution*, 34(8), 2115–2122.
- 950 Huerta-Cepas, J., Szklarczyk, D., Heller, D., Hernández-Plaza, A., Forslund, S. K., Cook, H., ...

- 951 Bork, P. (2019). eggNOG 5.0: a hierarchical, functionally and phylogenetically annotated  
952 orthology resource based on 5090 organisms and 2502 viruses. *Nucleic Acids*  
953 *Research*, 47(D1), D309–D314.
- 954 Hug, L. A., Baker, B. J., Anantharaman, K., Brown, C. T., Probst, A. J., Castelle, C. J., ...  
955 Banfield, J. F. (2016). A new view of the tree of life. *Nature Microbiology*, 1, 16048.
- 956 Hyatt, D., Chen, G.-L., LoCascio, P. F., Land, M. L., Larimer, F. W., & Hauser, L. J. (2010).  
957 Prodigal: prokaryotic gene recognition and translation initiation site identification. *BMC*  
958 *Bioinformatics*, 11(1), 119–119.
- 959 Ivanova, N. N., Schwientek, P., Tripp, H. J., Rinke, C., Pati, A., Huntemann, M., ... Rubin, E. M.  
960 (2014). Stop codon reassignments in the wild. *Science*, 344(6186), 909–913.
- 961 Jaroszewski, L., Li, Z., Krishna, S. S., Bakolitsa, C., Wooley, J., Deacon, M. A., ... Godzik, A.  
962 (2009). Exploration of uncharted regions of the protein universe. *PLoS Biology*, 7(9).
- 963 Jehl, P., Sievers, F., & Higgins, D. G. (2015). OD-seq: outlier detection in multiple sequence  
964 alignments. *BMC Bioinformatics*, 16(1), 269–269.
- 965 Kopf, A., Bicak, M., Kottmann, R., Schnetzer, J., Kostadinov, I., Lehmann, K., ... Glöckner, F. O.  
966 (2015). The ocean sampling day consortium. *GigaScience*, 4, 27.
- 967 Köster, J. (2018). Reproducible data analysis with Snakemake. *F1000Research*, 7. Retrieved  
968 from [http://www.dodsc.tu-](http://www.dodsc.tu-dortmund.de/cms/Medienpool/files/002_Kolloquium/09_Koester.pdf)  
969 [dortmund.de/cms/Medienpool/files/002\\_Kolloquium/09\\_Koester.pdf](http://www.dodsc.tu-dortmund.de/cms/Medienpool/files/002_Kolloquium/09_Koester.pdf)
- 970 La Cono, V., La Spada, G., Arcadi, E., Placenti, F., Smedile, F., Ruggeri, G., ... Yakimov, M. M.  
971 (2013). Partaking of Archaea to biogeochemical cycling in oxygen-deficient zones of  
972 meromictic saline Lake Faro (Messina, Italy). *Environmental Microbiology*, 15(6), 1717–  
973 1733.
- 974 Langfelder, P., Zhang, B., & Horvath, S. (2008). Defining clusters from a hierarchical cluster  
975 tree: the Dynamic Tree Cut package for R. *Bioinformatics*, 24(5), 719–720.
- 976 Levins, R. (1966). THE STRATEGY OF MODEL BUILDING IN POPULATION BIOLOGY.

- 977 *American Scientist*, 54(4), 421–431.
- 978 Li, H., & Durbin, R. (2010). Fast and accurate long-read alignment with Burrows–Wheeler  
979 transform. *Bioinformatics*, 26(5), 589–595.
- 980 Li, W., & Godzik, A. (2006). Cd-hit: a fast program for clustering and comparing large sets of  
981 protein or nucleotide sequences. *Bioinformatics*, 22(13), 1658–1659.
- 982 Liu, X. L. (2017). Deep Recurrent Neural Network for Protein Function Prediction from  
983 Sequence (p. 103994). doi:10.1101/103994
- 984 Lloyd-Price, J., Mahurkar, A., Rahnavard, G., Crabtree, J., Orvis, J., Hall, A. B., ... Huttenhower,  
985 C. (2017). Strains, functions and dynamics in the expanded Human Microbiome Project.  
986 *Nature*, 550(7674), 61–66.
- 987 Lobb, B., Kurtz, D. A., Moreno-Hagelsieb, G., & Doxey, A. C. (2015). Remote homology and the  
988 functions of metagenomic dark matter. *Frontiers in Genetics*, 6(JUL), 1–12.
- 989 Ma, Y., Madupu, R., Karaoz, U., Nossa, C. W., Yang, L., Yooseph, S., ... Pei, Z. (2014). Human  
990 papillomavirus community in healthy persons, defined by metagenomics analysis of  
991 human microbiome project shotgun sequencing data sets. *Journal of Virology*, 88(9),  
992 4786–4797.
- 993 Martiny, A. C., Treseder, K., & Pusch, G. (2013). Phylogenetic conservatism of functional traits  
994 in microorganisms. *The ISME Journal*, 7(4), 830–838.
- 995 Matsen, F. A., Kodner, R. B., & Armbrust, E. V. (2010). pplacer: linear time maximum-likelihood  
996 and Bayesian phylogenetic placement of sequences onto a fixed reference tree. *BMC*  
997 *Bioinformatics*, 11, 538.
- 998 Méheust, R., Burstein, D., Castelle, C. J., & Banfield, J. F. (2019). The distinction of CPR  
999 bacteria from other bacteria based on protein family content. *Nature Communications*,  
1000 10(1), 4173.
- 1001 Mendler, K., Chen, H., Parks, D. H., Lobb, B., Hug, L. A., & Doxey, A. C. (2019). AnnoTree:  
1002 visualization and exploration of a functionally annotated microbial tree of life. *Nucleic*

- 1003 *Acids Research*, 47(9), 4442–4448.
- 1004 Miklós, I., & Podani, J. (2004). RANDOMIZATION OF PRESENCE–ABSENCE MATRICES:  
1005 COMMENTS AND NEW ALGORITHMS. *Ecology*, Vol. 85, pp. 86–92. doi:10.1890/03-  
1006 0101
- 1007 Mitchell, A. L., Almeida, A., Beracochea, M., Boland, M., Burgin, J., Cochrane, G., ... Finn, R. D.  
1008 (2020). MGnify: the microbiome analysis resource in 2020. *Nucleic Acids Research*,  
1009 48(D1), D570–D578.
- 1010 Muller, E. E. L. (2019). Determining Microbial Niche Breadth in the Environment for Better  
1011 Ecosystem Fate Predictions. *MSystems*, 4(3). doi:10.1128/mSystems.00080-19
- 1012 Murat Eren, A., Esen, Ö. C., Quince, C., Vineis, J. H., Morrison, H. G., Sogin, M. L., & Delmont,  
1013 T. O. (2015). Anvi'o: an advanced analysis and visualization platform for 'omics data.  
1014 *PeerJ*, 3, e1319.
- 1015 NCBI Resource Coordinators. (2018). Database resources of the National Center for  
1016 Biotechnology Information. *Nucleic Acids Research*, 46(D1), D8–D13.
- 1017 Needham, D. M., Yoshizawa, S., Hosaka, T., Poirier, C., Choi, C. J., Hehenberger, E., ...  
1018 Worden, A. Z. (2019). A distinct lineage of giant viruses brings a rhodopsin photosystem  
1019 to unicellular marine predators. *Proceedings of the National Academy of Sciences of the*  
1020 *United States of America*, 116(41), 20574–20583.
- 1021 Olson, D. K., Yoshizawa, S., Boeuf, D., Iwasaki, W., & DeLong, E. F. (2018). Proteorhodopsin  
1022 variability and distribution in the North Pacific Subtropical Gyre. *The ISME Journal*,  
1023 12(4), 1047–1060.
- 1024 Pachiadaki, M. G., Brown, J. M., Brown, J., Bezuidt, O., Berube, P. M., Biller, S. J., ...  
1025 Stepanauskas, R. (2019). Charting the Complexity of the Marine Microbiome through  
1026 Single-Cell Genomics. *Cell*, 179(7), 1623-1635.e11.
- 1027 Parks, D. H., Chuvochina, M., Waite, D. W., Rinke, C., Skarshewski, A., Chaumeil, P.-A., &  
1028 Hugenholtz, P. (2018). A standardized bacterial taxonomy based on genome phylogeny

- 1029           substantially revises the tree of life. *Nature Biotechnology*, 36(10), 996–1004.
- 1030 Pasolli, E., Asnicar, F., Manara, S., Zolfo, M., Karcher, N., Armanini, F., ... Segata, N. (2019).  
1031           Extensive Unexplored Human Microbiome Diversity Revealed by Over 150,000  
1032           Genomes from Metagenomes Spanning Age, Geography, and Lifestyle. *Cell*, 176(3),  
1033           649-662.e20.
- 1034 Perdigão, N., Rosa, A. C., & O'Donoghue, S. I. (2017). The Dark Proteome Database. *BioData*  
1035           *Mining*, 10(1), 1–11.
- 1036 Price, M. N., Wetmore, K. M., Waters, R. J., Callaghan, M., Ray, J., Liu, H., ... Deutschbauer, A.  
1037           M. (2018). Mutant phenotypes for thousands of bacterial genes of unknown function.  
1038           *Nature*, 557(7706), 503–509.
- 1039 Quince, C., Walker, A. W., Simpson, J. T., Loman, N. J., & Segata, N. (2017). Shotgun  
1040           metagenomics, from sampling to analysis. *Nature Biotechnology*, 35(9), 833–844.
- 1041 Quinlan, A. R., & Hall, I. M. (2010). BEDTools: a flexible suite of utilities for comparing genomic  
1042           features. *Bioinformatics*, 26(6), 841–842.
- 1043 Remmert, M., Biegert, A., Hauser, A., & Söding, J. (2012). HHblits: Lightning-fast iterative  
1044           protein sequence searching by HMM-HMM alignment. *Nature Methods*, 9(2), 173–175.
- 1045 Rinke, C., Schwientek, P., Sczyrba, A., Ivanova, N. N., Anderson, I. J., Cheng, J.-F., ... Woyke,  
1046           T. (2013). Insights into the phylogeny and coding potential of microbial dark matter.  
1047           *Nature*, 499(7459), 431–437.
- 1048 Rost, B. (1999). Twilight zone of protein sequence alignments. *Protein Engineering, Design &*  
1049           *Selection: PEDS*, 12(2), 85–94.
- 1050 Roumpeka, D. D., Wallace, R. J., Escalettes, F., Fotheringham, I., & Watson, M. (2017). A  
1051           Review of Bioinformatics Tools for Bio-Propecting from Metagenomic Sequence Data.  
1052           *Frontiers in Genetics*, 8, 23.
- 1053 Rusch, D. B., Halpern, A. L., Sutton, G., Heidelberg, K. B., Williamson, S., Yooseph, S., ...  
1054           Venter, J. C. (2007). The Sorcerer II Global Ocean Sampling Expedition: Northwest



- 1055 Atlantic through Eastern Tropical Pacific. *PLoS Biology*, 5(3), 1–34.
- 1056 Salazar, G., Cornejo-Castillo, F. M., Borrull, E., Díez-Vives, C., Lara, E., Vaqué, D., ... Acinas,  
1057 S. G. (2015). Particle-association lifestyle is a phylogenetically conserved trait in  
1058 bathypelagic prokaryotes. *Molecular Ecology*, 24(22), 5692–5706.
- 1059 Salazar, G., Paoli, L., Alberti, A., Huerta-Cepas, J., Ruscheweyh, H.-J., Cuenca, M., ...  
1060 Sunagawa, S. (2019). Gene Expression Changes and Community Turnover Differentially  
1061 Shape the Global Ocean Metatranscriptome. *Cell*, 179(5), 1068-1083.e21.
- 1062 Sanger, F., Nicklen, S., & Coulson, A. R. (1977). DNA sequencing with chain-terminating  
1063 inhibitors. *Proceedings of the National Academy of Sciences of the United States of*  
1064 *America*, 74(12), 5463–5467.
- 1065 Sberro, H., Fremin, B. J., Zlitni, S., Edfors, F., Greenfield, N., Snyder, M. P., ... Bhatt, A. S.  
1066 (2019). Large-Scale Analyses of Human Microbiomes Reveal Thousands of Small,  
1067 Novel Genes. *Cell*, 178(5), 1245-1259.e14.
- 1068 Scales, B. S., Dickson, R. P., LiPuma, J. J., & Huffnagle, G. B. (2014). Microbiology, genomics,  
1069 and clinical significance of the *Pseudomonas fluorescens* species complex, an  
1070 unappreciated colonizer of humans. *Clinical Microbiology Reviews*, 27(4), 927–948.
- 1071 Skewes-Cox, P., Sharpton, T. J., Pollard, K. S., & DeRisi, J. L. (2014). Profile hidden Markov  
1072 models for the detection of viruses within metagenomic sequence data. *PloS One*, 9(8),  
1073 e105067.
- 1074 Spang, A., Saw, J. H., Jørgensen, S. L., Zaremba-Niedzwiedzka, K., Martijn, J., Lind, A. E., ...  
1075 Ettema, T. J. G. (2015). Complex archaea that bridge the gap between prokaryotes and  
1076 eukaryotes. *Nature*, 521(7551), 173–179.
- 1077 Stamatakis, A. (2014). RAxML version 8: a tool for phylogenetic analysis and post-analysis of  
1078 large phylogenies. *Bioinformatics*, 30(9), 1312–1313.
- 1079 Steinegger, M., Meier, M., Mirdita, M., Vöhringer, H., Haunsberger, S. J., & Söding, J. (2019).  
1080 HH-suite3 for fast remote homology detection and deep protein annotation. *BMC*

- 1081 *Bioinformatics*, 20(1), 473.
- 1082 Steinegger, M., Mirdita, M., & Söding, J. (2019). Protein-level assembly increases protein  
1083 sequence recovery from metagenomic samples manifold. *Nature Methods*, 16(7), 603–  
1084 606.
- 1085 Steinegger, M., & Salzberg, S. L. (2020). Terminating contamination: large-scale search  
1086 identifies more than 2,000,000 contaminated entries in GenBank. *Genome Biology*,  
1087 21(1), 115.
- 1088 Steinegger, M., & Soding, J. (2017). MMseqs2 enables sensitive protein sequence searching for  
1089 the analysis of massive data sets. *Nature Biotechnology*, advance on.  
1090 doi:10.1038/nbt.3988
- 1091 Steinegger, M., & Söding, J. (2018). Clustering huge protein sequence sets in linear time.  
1092 *Nature Communications*, 9(1), 2542.
- 1093 Sunagawa, S., Coelho, L. P., Chaffron, S., Kultima, J. R., Labadie, K., Salazar, G., ... Bork, P.  
1094 (2015). Ocean plankton. Structure and function of the global ocean microbiome.  
1095 *Science*, 348(6237), 1261359.
- 1096 The UniProt Consortium. (2017). UniProt: the universal protein knowledgebase. *Nucleic Acids*  
1097 *Research*, 45(D1), D158–D169.
- 1098 Thomas, A. M., & Segata, N. (2019). Multiple levels of the unknown in microbiome research.  
1099 *BMC Biology*, 17(1), 48.
- 1100 Titus Brown, C., Moritz, D., O'Brien, M. P., Reidl, F., Reiter, T., & Sullivan, B. D. (2018).  
1101 Exploring neighborhoods in large metagenome assembly graphs reveals hidden  
1102 sequence diversity (p. 462788). doi:10.1101/462788
- 1103 UniProt Consortium, T. (2018). UniProt: the universal protein knowledgebase. *Nucleic Acids*  
1104 *Research*, 46(5), 2699.
- 1105 van Dongen, S., & Abreu-Goodger, C. (2012). Using MCL to Extract Clusters from Networks. In  
1106 J. van Helden, A. Toussaint, & D. Thiéffry (Eds.), *Bacterial Molecular Networks: Methods*

- 1107            *and Protocols* (pp. 281–295). New York, NY: Springer New York.
- 1108 Vanhoutreve, R., Kress, A., Legrand, B., Gass, H., Poch, O., & Thompson, J. D. (2016). LEON-  
1109            BIS: multiple alignment evaluation of sequence neighbours using a Bayesian inference  
1110            system. *BMC Bioinformatics*, *17*(1), 271–271.
- 1111 Vorobev, A., Dupouy, M., Carradec, Q., Delmont, T., Annamale, A., Wincker, P., & Pelletier, E.  
1112            (2020). Transcriptome reconstruction and functional analysis of eukaryotic marine  
1113            plankton communities via high-throughput metagenomics and metatranscriptomics.  
1114            *Genome Research*. doi:10.1101/gr.253070.119
- 1115 Wyman, S. K., Avila-Herrera, A., Nayfach, S., & Pollard, K. S. (2018). A most wanted list of  
1116            conserved microbial protein families with no known domains. *PLoS One*, *13*(10),  
1117            e0205749.
- 1118 Yooseph, S., Li, W., & Sutton, G. (2008). Gene identification and protein classification in  
1119            microbial metagenomic sequence data via incremental clustering. *BMC Bioinformatics*,  
1120            *9*, 1–13.
- 1121 Yooseph, S., Sutton, G., Rusch, B. D., Halpern, L. A., Williamson, J. S., Remington, K., ...  
1122            Venter, C. J. (2007). The Sorcerer II global ocean sampling expedition: Expanding the  
1123            universe of protein families. *PLoS Biology*, *5*(3), 0432–0466.
- 1124 Žure, M., Fernandez-Guerra, A., Munn, C. B., & Harder, J. (2017). Geographic distribution at  
1125            subspecies resolution level: closely related *Rhodopirellula* species in European coastal  
1126            sediments. *The ISME Journal*, *11*(2), 478–489.
