# Supplementary material for: Unifying the known and unknown microbial coding sequence space
Source: bioRxiv or medRxiv preprint supplement (doi:10.1101/2020.06.30.180448), 2021-11-09
Supplement: Supplementary file [file media-1.pdf]

# 1 Supplementary figures

2

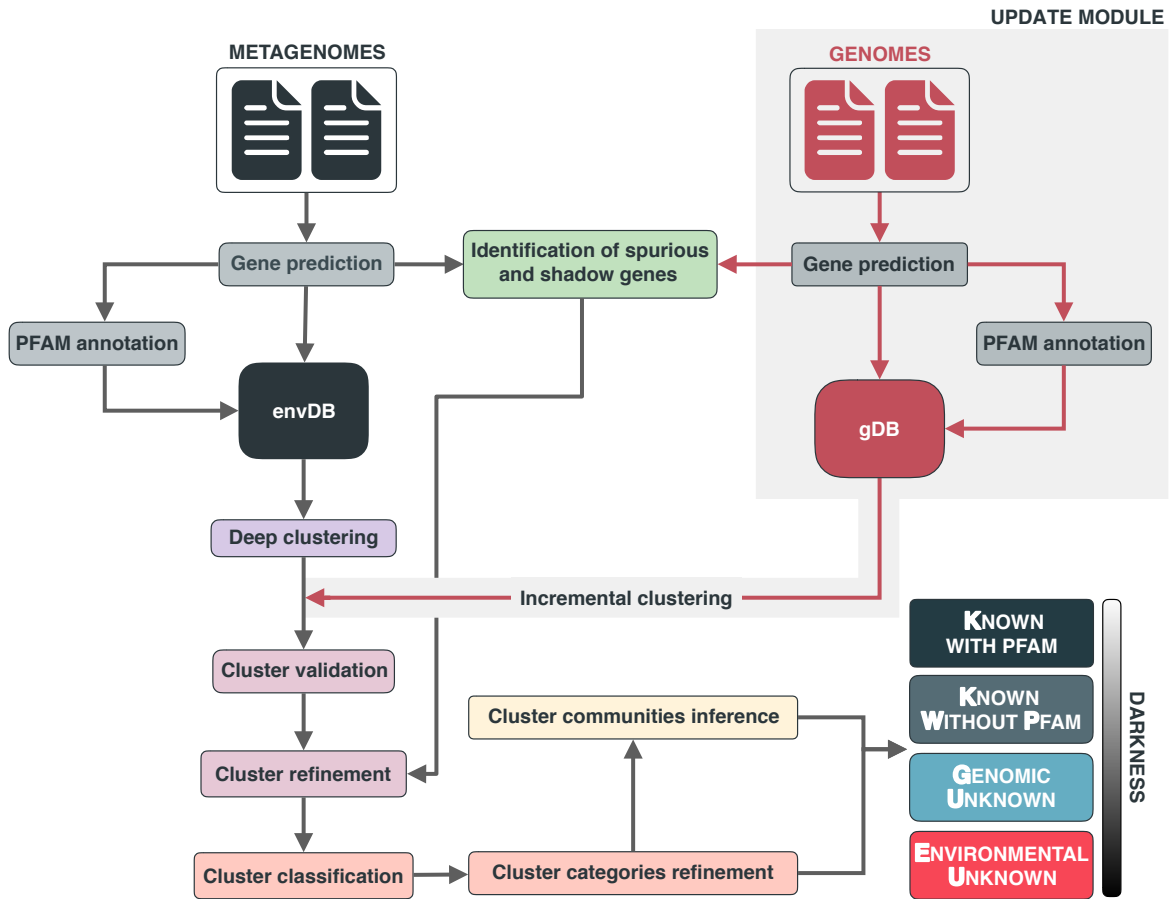

3

4 **Supplementary Figure 1.** Overview of the workflow to partition the genomic and metagenomic  
5 coding sequence space between known and unknown. The workflow performs gene prediction, gene  
6 clustering, gene clustering validation and refinement, GCC inference, and partitions the coding  
7 sequence space in the different known and unknown categories.

8

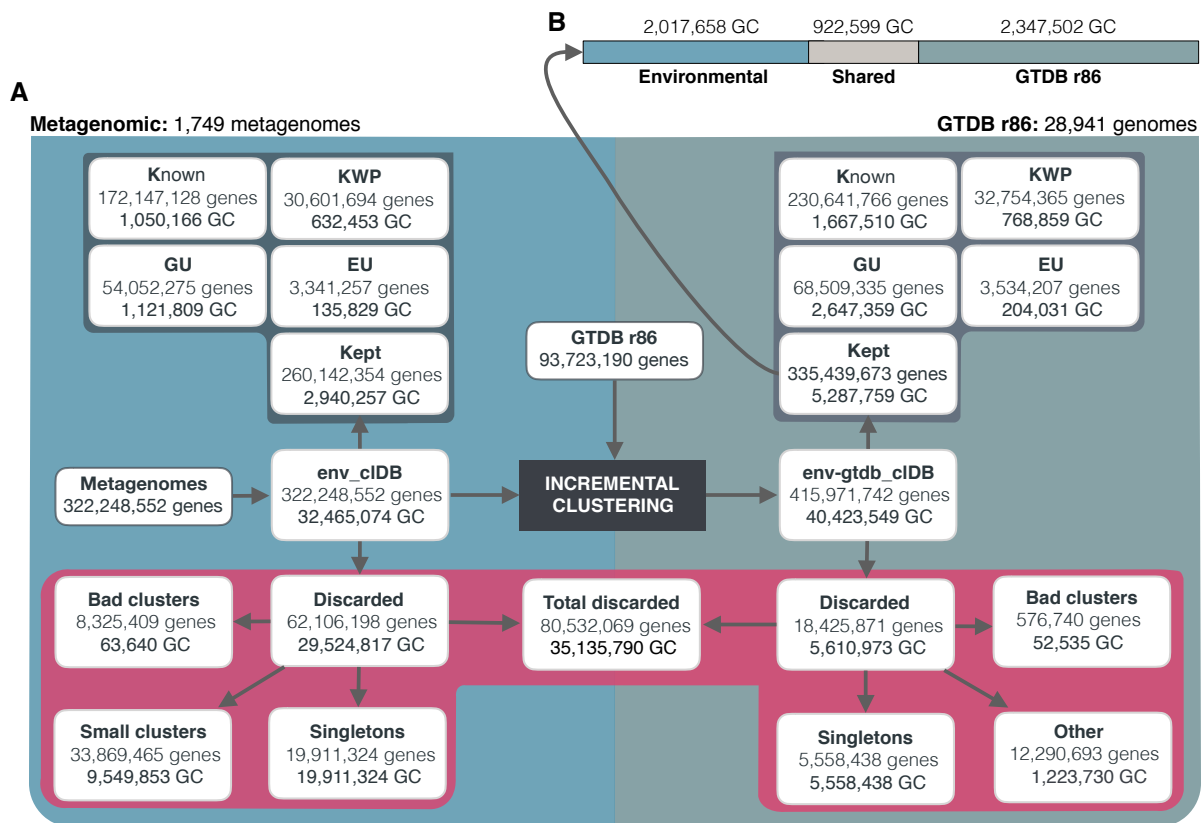

9  
 10 **Supplementary Figure 2.** The diagram shows a schematic description of the number of genes and  
 11 GCs that have been kept or discarded. (A) We analyzed a dataset of 1,749 metagenomes from  
 12 marine and human environments and 28,941 genomes from the GTDB\_r86 summing up to  
 13 415,971,742 genes. The composition of the genomic box “Other” is described in supplementary Note  
 14 5. (B) GC overlap between the environmental and genomic datasets.

15

16

17

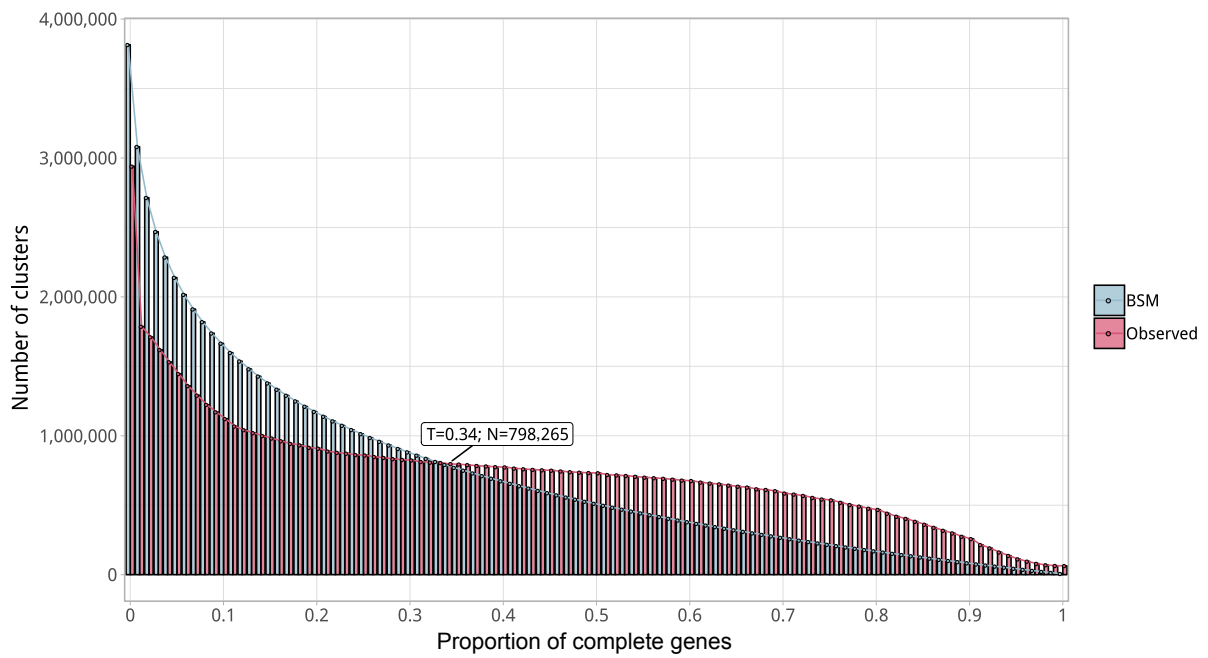

18

19 **Supplementary Figure 3.** Proportion of complete genes per cluster. Distribution of observed  
20 values compared with those generated by the Broken-stick model. The cut-off was  
21 determined at 34% complete genes per cluster.

22

23

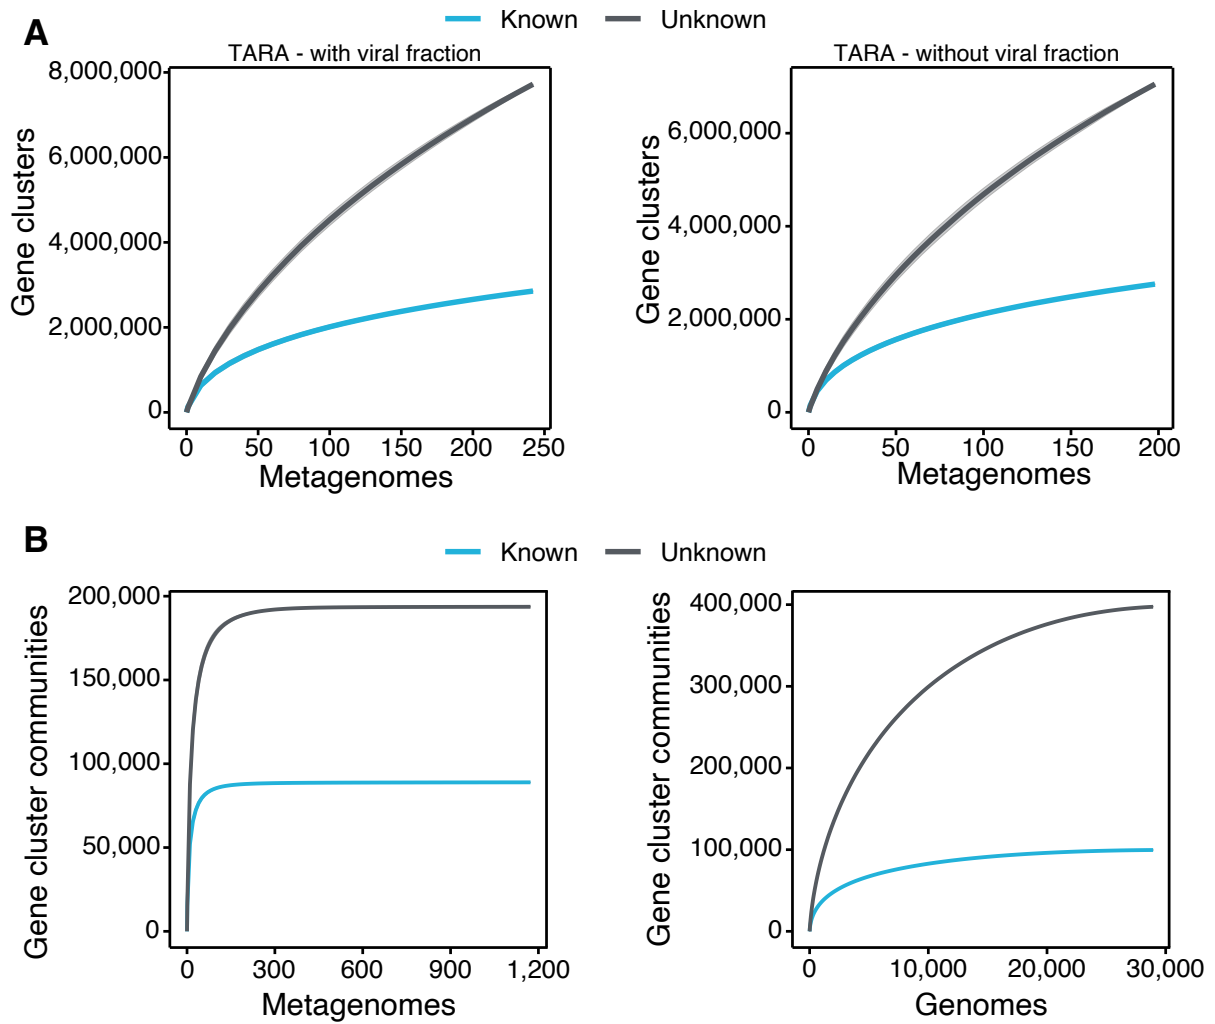

24

25 **Supplementary Figure 4:** Collector curves for the known and unknown coding sequence  
 26 space. (A) Collector curves at the gene cluster level, for the TARA metagenomes, including  
 27 the viral fraction (left) and excluding it (right) from the analysis. (B) Collector curves at gene  
 28 cluster community level for the metagenomes from TARA, MALASPINA, and HMP-I/II  
 29 projects (left) and the 28,941 GTDB genomes (right).

30

31

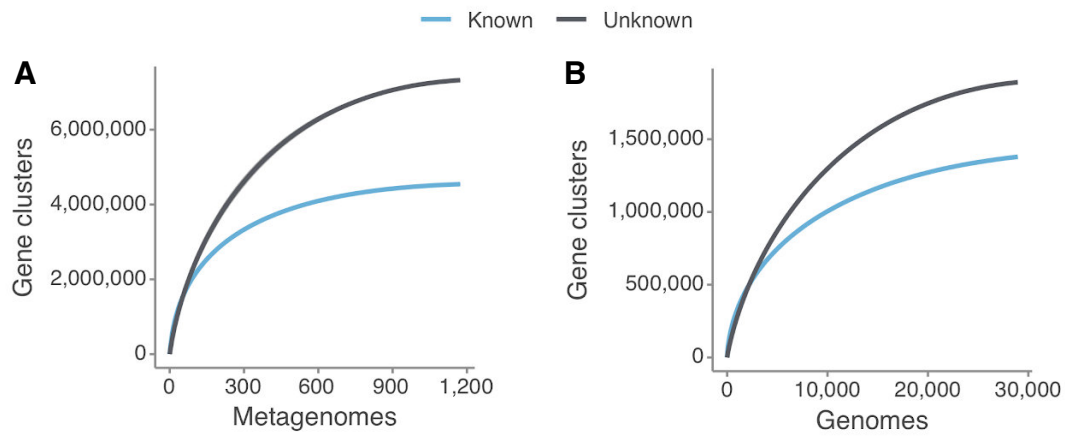

32

33 **Supplementary Figure 5:** Collector curves for the known and unknown coding sequence  
34 space at the gene cluster communities level for (A) the metagenomes from TARA,  
35 MALASPINA and HMP-I/II projects, and for (B) the 28,941 GTDB genomes. Singletons were  
36 excluded from the calculations.

37

38

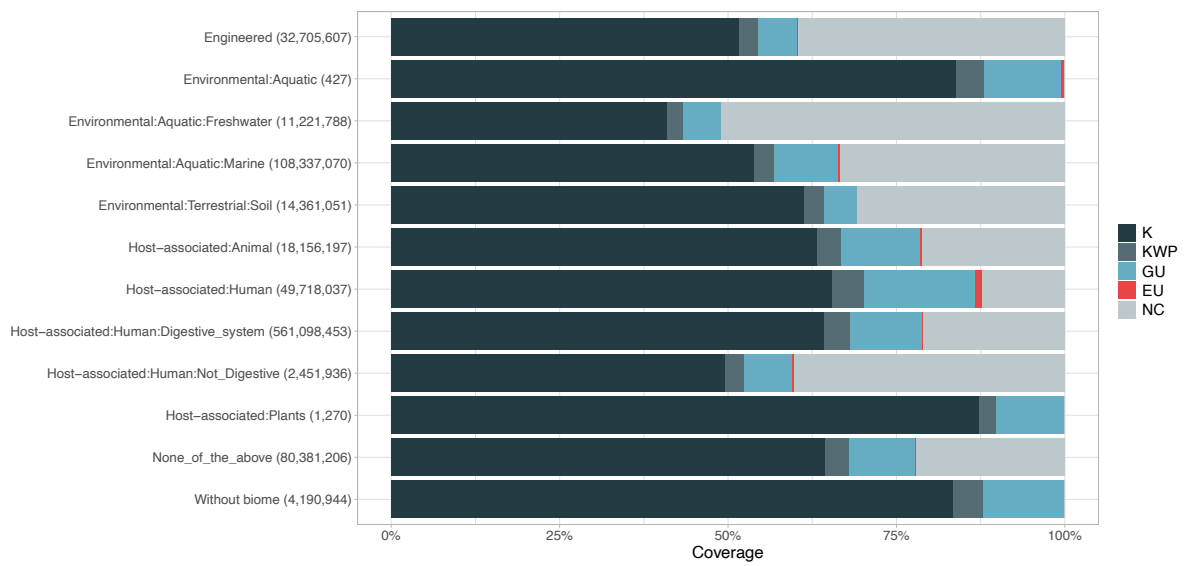

40

41

42

43

44

45

**Supplementary Figure 6.** Proportion of gene cluster categories per biome. On the y-axis are reported the 11 main biome categories indicated by MGnify and in parenthesis the total number of genes in each biome. The gray fraction represents the pool of genes from MGnify that were not found in our dataset.

45

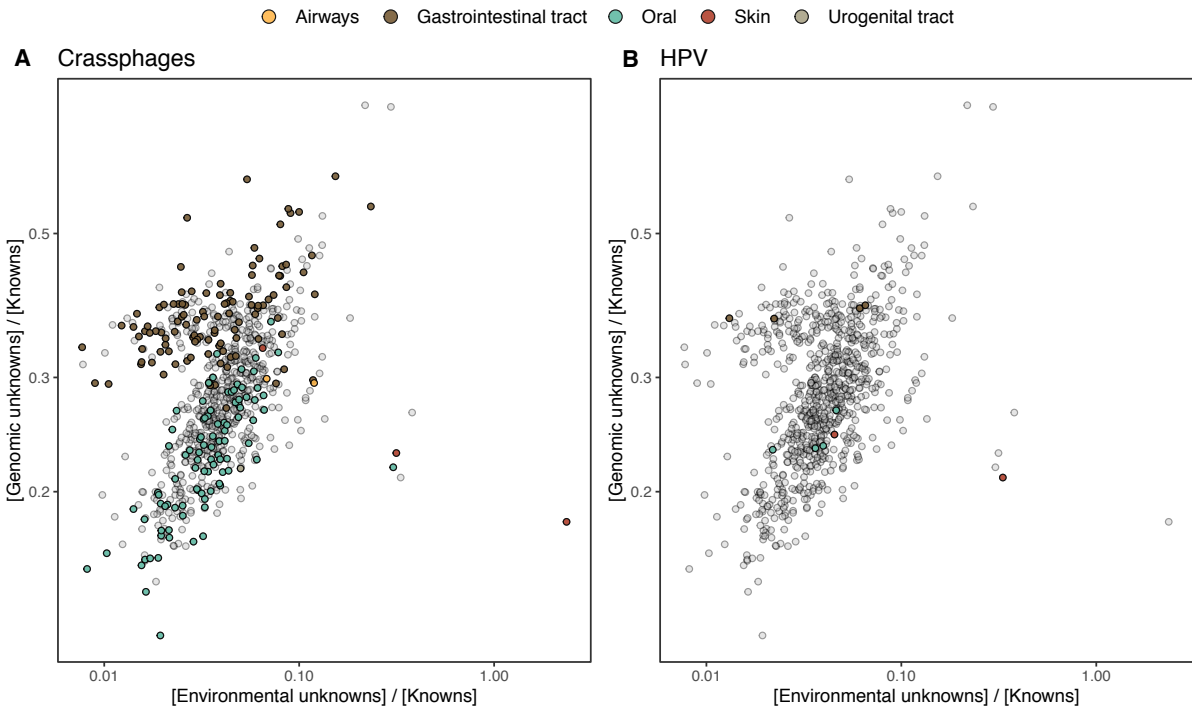

46

47 **Supplementary Figure 7.** HMP outlier samples enriched in (A) crAssphages, and (B)

48 papillomaviruses (HPV).

49

50

51 **Supplementary Tables**

52

53 **Supplementary Table 1.** Number of metagenomic clusters and genes after the validation  
54 and refinement steps.

|          | Good-quality | Bad-quality | Total       |
|----------|--------------|-------------|-------------|
| Clusters | 2,940,257    | 63,640      | 32,465,074  |
| Genes    | 260,142,354  | 8,325,409   | 322,248,552 |

55



56 **Supplementary Table 2.** MG + GTDB high quality (HQ) subset of gene clusters (GCs).

| Category | HQ GCs  | HQ genes   | pHQ GCs | pHQ genes |
|----------|---------|------------|---------|-----------|
| K        | 76,718  | 40,710,936 | 0.0145  | 0.120     |
| KWP      | 16,922  | 1,733,599  | 0.00320 | 0.005132  |
| GU       | 95,370  | 9,908,630  | 0.0180  | 0.0293    |
| EU       | 14,207  | 477,625    | 0.00269 | 0.00141   |
| Total    | 203,217 | 52,830,790 | 0.0384  | 0.1562    |

57

58

59 **Supplementary Table 3.** Mean proportion of complete genes per cluster in the four  
60 functional categories.

|                                   | K    | KWP  | GU   | EU   |
|-----------------------------------|------|------|------|------|
| Mean percentage of complete genes | 0.50 | 0.22 | 0.68 | 0.70 |

61

62

63 **Supplementary Table 4.** KWP high-quality gene clusters (GCs) distribution in the COG  
64 groups. (Full table in Supplementary\_tables\_1.xlsx)

| COG group                          | Number of GCs | Proportion of GCs |
|------------------------------------|---------------|-------------------|
| CELLULAR PROCESSES AND SIGNALING   | 2,292         | 0.135             |
| INFORMATION STORAGE AND PROCESSING | 1,582         | 0.0935            |
| METABOLISM                         | 1,679         | 0.0992            |
| POORLY CHARACTERIZED               | 2,899         | 0.171             |
| NC                                 | 8,470         | 0.501             |

65  
66

67 **Supplementary Table 5.** MG + GTDB gene clusters summary statistics.  
68 (Supplementary\_tables\_2.xlsx)  
69  
70

71 **Supplementary Table 6.** Environmental (metagenomic) dataset description.

72 (A) Number of samples and sites per metagenomic project.

| Dataset   | Reference                       | Samples | Sites | Contigs    |
|-----------|---------------------------------|---------|-------|------------|
| TARA      | Sunagawa et al.                 | 242     | 141   | 62,404,654 |
| Malaspina | Duarte et al.                   | 116     | 30    | 9,330,293  |
| OSD       | Kopf et al. <sup>3</sup>        | 145     | 139   | 4,127,095  |
| HMP       | Lloyd-Price et al. <sup>4</sup> | 1,246   | 18    | 80,560,927 |

73

| Dataset | Reference                | Samples | Sites | Reads      |
|---------|--------------------------|---------|-------|------------|
| GOS     | Rush et al. <sup>5</sup> | 80      | 70    | 12,672,518 |

74 (B) Number of predicted genes per completeness category.

| Total       | "00"        | "10"        | "01"        | "11"       |
|-------------|-------------|-------------|-------------|------------|
| 322,248,552 | 118,717,690 | 106,031,163 | 102,966,482 | 75,694,123 |

75 Note: "00"=complete, both start and stop codon identified. "01"=right boundary incomplete.

76 "10"=left boundary incomplete. "11"=both left and right edges incomplete.

77

78

79 **Supplementary Table 7.** Proportion of genes in each cluster category, and Pfam amino  
80 acids coverage per cluster category. (Supplementary\_tables\_1.xlsx)  
81

82 **Supplementary Table 8.** List of HMP outlier samples (Supplementary\_tables\_1.xlsx).

83

84

85 **Supplementary Table 9.** Summary of the number of EU clusters based on their presence in  
 86 MAGs and their environmental distribution, obtained with the Levin's Niche Breadth index.

|                | Total clusters | Broad     | Narrow      | Non-significant |
|----------------|----------------|-----------|-------------|-----------------|
| Total EU       | 204,031        | 471       | 8,421       | 195,079         |
| EU in MAGs     | 55,520         | 88        | 316         | 55,116          |
| EU not in MAGs | 148,511 (73%)  | 383 (81%) | 8,105 (96%) | 140,023 (72%)   |

87  
 88



89 **Supplementary Table 10.** Number of phylogenetic conserved and lineage-specific gene  
90 clusters (GCs) in the GTDB bacterial phylogeny. (Supplementary\_tables\_1.xlsx).  
91  
92

93 **Supplementary Table 11.** Clusters in the GU community GU\_c\_21103  
94 (Supplementary\_tables\_1.xlsx).

95 **Supplementary Table 12.** Number of lineage-specific gene clusters of unknown function at  
96 different taxonomic levels within the *Cand. Patescibacteria* phylum.  
97

| Taxonomic level | Number of clusters |
|-----------------|--------------------|
| Phylum          | 2                  |
| Class           | 6                  |
| Order           | 104                |
| Family          | 1,456              |
| Genus           | 6,987              |
| Species         | 45,788             |

98  
99  
100

101 **Supplementary Table 13.** List of filtered samples used for the metagenomic analyses.  
102 (Supplementary\_tables\_1.xlsx)  
103  
104

105  
106  
107  
108  
109

**Supplementary Table 14.** List of terms commonly used to define proteins of unknown function in public databases. (Supplementary\_tables\_1.xlsx)

## 110 Supplementary Notes

### 111 Supplementary Note 1 - Metagenomic singletons and small 112 gene clusters

113 *Analysis of metagenomic singletons and gene clusters with less than ten genes.*

114 The singletons represent 60% of the gene clusters (GCs) and 6% of the total genes. The  
115 GCs with less than ten genes, here referred to as small GCs for simplicity, represent 29% of  
116 the GCs and 10.5% of the gene dataset (Supp. Figure 2A). Although we discarded these two  
117 sets from the main study, we investigated them to obtain a complete analysis of the initial  
118 dataset. Both sets were first searched against the Pfam database of protein domain  
119 families<sup>6</sup>, and subsequently classified following the steps described in Supplementary Note  
120 3. For the small GCs classification, we used the cluster consensus sequence, which we  
121 extracted using the *hhconsensus* program of the HH-SUITE<sup>7</sup>, from the GC multiple  
122 sequence alignments (MSAs), generated with FAMSA<sup>8</sup>.

123 We could not find any homologous in the Pfam database for the large majority of both  
124 singletons and small GCs, 95%, and 89%, respectively (Supp. Table 1-1). After the  
125 classification, the large majority of the singletons remained completely uncharacterized,  
126 (64% was identified as EU) (Supp. Table 1-2). Similarly, the small GCs were also found  
127 dominated by GCs of unknowns, with 38% of the clusters classified as EU and 29% as GU  
128 (Supp. Table 1-2).

129

130 **Supplementary Table 1-1.** Singletons and small GCs Pfam annotations.

|            | Total      | Annotated | Not annotated |
|------------|------------|-----------|---------------|
| Singletons | 19,911,324 | 934,548   | 18,976,776    |
| Small GCs  | 9,549,853  | 1,028,076 | 8,521,777     |

131

132 **Supplementary Table 1-2.** Number of singletons and small GCs per functional category.

|            | K       | KWP       | GU        | EU         |
|------------|---------|-----------|-----------|------------|
| Singletons | 852,413 | 3,505,161 | 2,763,476 | 12,790,274 |
| Small GCs  | 946,112 | 2,213,654 | 2,744,262 | 3,645,825  |

## 133 Supplementary Note 2 - Metagenomic gene cluster validation 134 and refinement

135 *To obtain a set of gene clusters characterized by a high intra-cluster homogeneity, we*  
136 *identified spurious, shadow and outlier genes, and we removed them from the clusters.*

137

138 *Identification of spurious genes.* We identified spurious genes by screening our gene data  
139 set against the *AntiFam* database <sup>9</sup>.

140 *Identification of shadow genes.* We identified shadow genes using the procedure described  
141 in Yooseph et al. <sup>10</sup>. (1) Two genes on the same strand are considered overlapping if their  
142 intervals overlap by at least 60 bps; (2) genes that are on the opposite strands are  
143 considered overlapping if their intervals overlap by at least 50 bps, and their 3' ends are  
144 within each other's intervals, or if their intervals overlap by at least 120 bps and the 5' end of  
145 one is in the interval of the other.

146 *Identification of outlier genes.* Outlier genes are sequences inside a cluster non-homologous  
147 to the other cluster genes and were identified during the cluster validation step (see Methods  
148 - **Gene cluster validation**).

149 The number of spurious, shadow and outlier genes identified in the data set is reported in  
150 Supplementary Table 2-1.

151 *Cluster refinement.* After the validation, we proceeded with the retrieval of the subset of  
152 "good" clusters. Clusters with  $\geq 30\%$  shadow genes were identified as shadow-clusters, as  
153 proposed in Yooseph et al. <sup>10</sup>. During the cluster validation, we identified a minimum of 10%  
154 outlier genes as the threshold to classify a cluster as "bad-quality" (Supp. Fig. 2-2; Suppl.  
155 Table 2-2A). We combined this threshold with a Jaccard similarity index  $< 1$ , indicating a low  
156 intra-cluster Pfam domain architecture (DA) homogeneity, for the Pfam annotated clusters  
157 (Supp. Table 2-2B). We performed the cluster refinement in three consecutive steps:

- 158 I. Discard the "bad" clusters ( $\geq 10\%$  outliers & Jaccard similarity index  $< 1$ )
- 159 II. Discard the "shadow" clusters ( $\geq 30\%$  shadow genes)
- 160 III. Remove the single shadow, spurious and outlier genes from the remaining clusters.

161 The results for each step are shown in Supplementary Table 2-3. From the initial set of ~3M  
162 clusters with more than ten genes, we identified 57,052 GCs as "bad" and 6,261 as  
163 "shadow". From the remaining set of 2,940,593 clusters, we removed a total of 2,708,994  
164 shadow, spurious and outlier genes. During this last step, we discarded 336 more clusters:  
165 244 resulted being composed only of spurious and outlier genes (one in the Pfam annotated  
166 set of clusters and 243 in the non-annotated set), and 92 clusters were discarded since they  
167 were left as singletons after refinement. Besides, we moved 1,190 Pfam annotated clusters

168 to the non-annotated set since they were left without any annotated gene. In summary, we  
 169 removed 63,640 GCs and a total of 8,325,409 genes, respectively, 2% and 3% of the initial  
 170 data set. The refined set contains 2,940,592 GCs and 260,142,354 genes (Supp. Table 3).

171 **Supplementary Table 2-1.** Number of spurious, shadow and outlier genes in the  
 172 metagenomic clusters.

| Gene category | Clusters $\geq 10$ genes | Clusters $< 10$ genes | Singletons |
|---------------|--------------------------|-----------------------|------------|
| Spurious      | 44,205                   | 6,784                 | 2,335      |
| Shadow        | 289,258                  | 144,571               | 177,126    |
| Outliers      | 3,118,850                | -                     | -          |

173

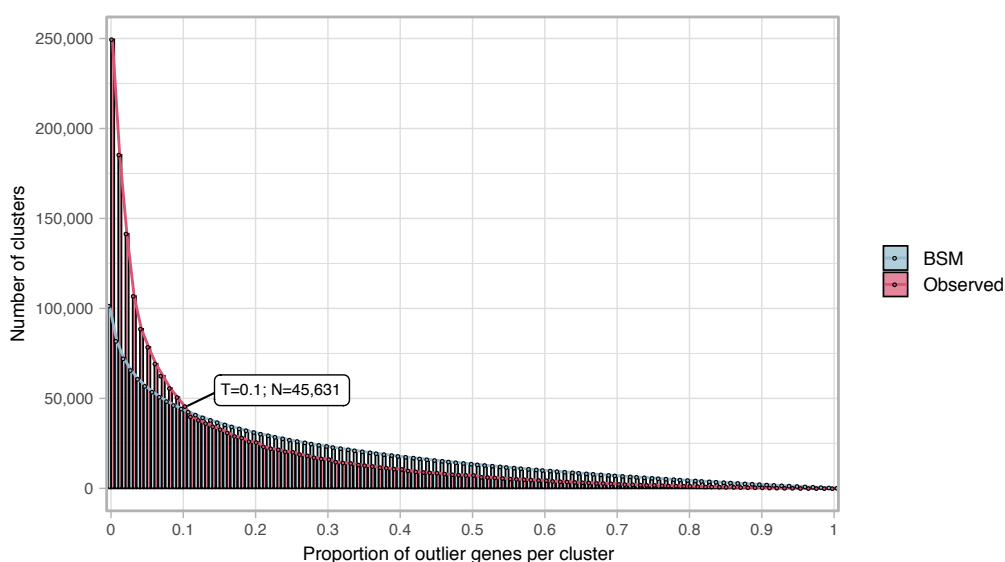

174

175 **Supplementary Figure 2-1.** Proportion of outlier genes detected within each cluster MSA.  
 176 Distribution of observed values compared with those generated by the Broken-stick model.  
 177 The cut-off was determined at 10% outlier genes per cluster.

178

179 **Supplementary Table 2-2.** Metagenomic gene cluster validation results.

180 (A) Evaluation of cluster sequence composition.

|          | Pre-Compos. validation | good quality | bad quality |
|----------|------------------------|--------------|-------------|
| Clusters | 3,003,897              | 2,958,266    | 45,631      |
| Genes    | 268,467,763            | 266,268,638  | 2,199,125   |

181 (B) Evaluation of cluster Pfam functional annotations.

|  | Pre-Funct. validation | Funct. good | Funct. bad |
|--|-----------------------|-------------|------------|
|--|-----------------------|-------------|------------|



|          |             |             |           |
|----------|-------------|-------------|-----------|
| Clusters | 1,015,924   | 1,004,166   | 11,758    |
| Genes    | 181,433,541 | 178,167,583 | 3,246,002 |

182

183 **Supplementary Table 2-3**

184 Steps:

185 Step I - Removing of the "bad clusters"

186 Step II - Removing of the "shadow clusters"

187 Step III - Removing single spurious, shadow or outlier genes

188

189 (A) Number of clusters in each step of the cluster refinement.

|          | Step I    | Step II   | Step III  | Refined   |
|----------|-----------|-----------|-----------|-----------|
| Clusters | 3,003,897 | 2,946,845 | 2,940,593 | 2,940,257 |
| Removed  | -57,052   | -6,252    | -336      |           |

190

191 (B) Number of genes in each step of the cluster refinement.

|         | Step I      | Step II     | Step III    | Refined     |
|---------|-------------|-------------|-------------|-------------|
| Genes   | 268,467,763 | 263,022,636 | 262,851,348 | 260,142,354 |
| Removed | -5,445,127  | -171,288    | -2,708,994  |             |

192

193

194

## 195 Supplementary Note 3 - Metagenomic gene cluster 196 classification and remote homology refinement

197 *Classification of the refined subset of gene clusters and remote homology refinement.*

198

### 199 **Methods**

200 We searched the gene clusters (GCs) without any Pfam annotated gene against two  
201 functional databases, the UniRef90, from UniProt<sup>11</sup>, and the NCBI *nr* database<sup>12</sup>. We  
202 screened the two databases using the cluster consensus sequences, obtained by applying  
203 the *hhconsensus* program of the *HH-SUITE*<sup>7</sup> on the clusters multiple sequence alignments  
204 (MSAs) generated with the *FAMSA* program<sup>8</sup>. We performed two nested searches using the  
205 *MMSeqs2*<sup>13</sup> program and following a similar workflow as the "2bLCA" described in  
206 Hingamp et al.<sup>14</sup>. The search-workflow consisted of five steps: First, we searched the  
207 consensus sequences against the functional database, with `-e 1e-05 --cov-mode 2 -c 0.6`.  
208 Second, we extracted the high scoring pairs (HSP) of the best hits and we searched them  
209 again using the same parameters. Third, we merged the top hits from the first with the  
210 second search results. Fourth, we filtered out the second search hits with a bigger e-value  
211 than the first search top hits. And fifth, we selected the hits that were found in 60% of the  
212  $\log_{10}(\text{best-e-value})$ . We first applied this search-workflow to screen the UniRef90 database  
213 (release 2017\_11)<sup>11</sup>. We classified the GCs as GU if their consensus sequences were found  
214 annotated to proteins labeled with any of the terms commonly used to define proteins of  
215 unknown function in public databases (Supp. Table 14). WE classified, instead, as KWP, the  
216 clusters with consensus annotated to functionally characterized proteins. Secondly, we  
217 applied the same search-workflow to search the consensus sequences with no homologs in  
218 the UniRef90 database, against the NCBI *nr* database (release 2017\_12)<sup>12</sup>. We used the  
219 same criteria to classify a GC as GU or KWP. Ultimately, we classified as EU the GCs  
220 whose consensus sequences did not align with any of the NCBI *nr* entries.

221 We processed the Pfam annotated GCs to retrieve a GC consensus domain architecture  
222 (DA). We classified as GU the GCs with a consensus DA composed only of Pfam domain of  
223 unknown function (DUFs) and as K the rest. The methods for this step are described in  
224 **Methods - Remote homology classification of gene clusters.**

225 We refined the classified GCs to account for remote homologies. A detailed description of  
226 this process can be found in **Methods - Gene cluster remote homology refinement.**

227

### 228 **Results**

229 From the 1,946,737 non-annotated clusters, 1,581,115 were found homologous to UniRef90  
 230 entries. Of these hits, more than 50% were found homologous to "hypothetical" proteins and  
 231 classified as GU, and the other hits were labeled as KWP. The remaining 365,622 clusters,  
 232 with no homologs to UniRef90, were screened against the NCBI nr database. We found  
 233 20,277 clusters in the NCBI nr, of them, 15,998 clusters were homologous to "hypothetical"  
 234 proteins, and 4,279 clusters to characterized proteins and were classified respectively as GU  
 235 and KWP. The remaining 345,345 clusters were not found in the NCBI nr database and  
 236 therefore identified as EU. After the cascaded profile search against UniRef90 and NCBI nr,  
 237 and the analysis of the GC consensus DAs, we classified the GCs into 912,551 K, 753,718  
 238 KWP, 928,643 GU, and 345,345 EU. Detailed results for each search are reported in  
 239 Supplementary Table 3-1.

240

241 **Supplementary Table 3-1.** Metagenomic gene clusters classification steps.

242 (A) Results from the search against the UniRef90 database

| Search vs UniRef90          | Hits          |              | No-hits |
|-----------------------------|---------------|--------------|---------|
| Initial clusters: 1,946,737 | 1,581,115     |              | 365,622 |
|                             | Characterized | Hypothetical |         |
|                             | 749,439       | 831,676      |         |

243

244 (B) Results from the search against the and the NCBI nr databases

| Search vs NCBI nr         | Hits          |              | No-hits |
|---------------------------|---------------|--------------|---------|
| Initial clusters: 365,622 | 20,277        |              | 345,345 |
|                           | Characterized | Hypothetical |         |
|                           | 4,279         | 15,998       |         |

245

246 (C) Classification of the Pfam annotated GCs based on the consensus DAs.

| Consensus DA analysis     | Annotated to DKF DAs | Annotated to DUF DAs |
|---------------------------|----------------------|----------------------|
| Initial clusters: 993,520 | 912,551              | 80,969               |

247

248 **Supplementary Table 3-2.** Metagenomic GC remote homology refinement steps.

|               | K       | KWP     | GU       | EU       |
|---------------|---------|---------|----------|----------|
| Initial GCs   | 912,551 | 753,718 | 928,643  | 345,345  |
| EU refinement | -       | +38,333 | +171,183 | -209,516 |

|                    |           |          |           |         |
|--------------------|-----------|----------|-----------|---------|
| Post-EU refinement | 912,551   | 792,051  | 1,099,826 | 135,829 |
| KWP refinement     | +137,615  | -159,598 | +21,983   | -       |
| Refined GCs        | 1,050,166 | 632,453  | 1,121,809 | 135,829 |

249

250

251

## 252 Supplementary Note 4 - GTDB integration

253 *Results from the integration of the Genome Taxonomy Database<sup>15</sup> into the metagenomic*  
254 *dataset.*

255

256 We integrated the metagenomic GCs with the 93,723,190 genes from the archaeal and  
257 bacterial GTDB genomes (release 86)<sup>15</sup>. A total of 67,446,376 genomic genes, 72% of the  
258 whole dataset, were found in the metagenomic GCs. The remaining 26,276,814 (28% of the  
259 initial dataset) genes were then clustered separately into 7,958,475 genomic GCs (Supp.  
260 Table 4-1). This set of GCs was processed through our workflow steps to be validated,  
261 classified and refined.

262 Within the set of genomic GCs, we identified 5,558,438 singletons and 2,400,037 GCs with  
263 more than one gene. We were able to annotate to Pfam protein domain families 41% of the  
264 genomic genes. The annotation led to 556,834 annotated GCs and 1,843,203 non-annotated  
265 GCs. The validation step determined the minimum proportion of outlier genes per cluster at  
266 11% (Supp. Fig. 4-1). The majority of the genomic GCs showed high intra-cluster  
267 homogeneity, both in terms of sequence composition and functional annotations (Supp.  
268 Table 4-2).

269 After the validation, we refined the GCs removing the GCs identified as "bad" and the  
270 detected outliers' genes (see Supp. Table 4-3). We classified the refined subset of 2,347,502  
271 GCs into the four functional categories via the same protocol applied for the metagenomic  
272 data set. The results of the GC classification are reported in Supplementary Table 4-4. After  
273 the classification steps, we refined the EU and KWP GCs searching their HMMs profiles for  
274 remote homologies in the Uniclust (release 30\_2017\_10)<sup>16</sup> and the Pfam (v. 31.0)<sup>6</sup>  
275 databases, respectively, using *HHblits*<sup>17</sup>. An overview of the results step-by-step can be  
276 found in Supplementary Table 4-5A. In the end, we obtained 617,344 GCs classified as  
277 Known, 136,406 as KWP, 1,525,550 as GU and 68,202 as EU (Supp. Table 4-5B). The  
278 genomic dataset appeared highly dominated by the GU, which accounts for 65% of the GCs.  
279 In the end, we retrieved a subset of genomic "High Quality" (mostly complete) GCs (Supp.  
280 Table 4-6). The numbers of genes and GCs for the integrated (MG+GTDB) dataset are  
281 reported in Supplementary Table 4-7.

282

283 **Supplementary Table 4-1.** GTDB integration in the metagenomic dataset.

|       | Metagenomic | Shared      | Genomic    | Total       |
|-------|-------------|-------------|------------|-------------|
| GCs   | 30,301,693  | 2,163,381   | 7,958,475  | 40,423,549  |
| Genes | 199,693,614 | 190,001,314 | 26,276,814 | 415,971,742 |

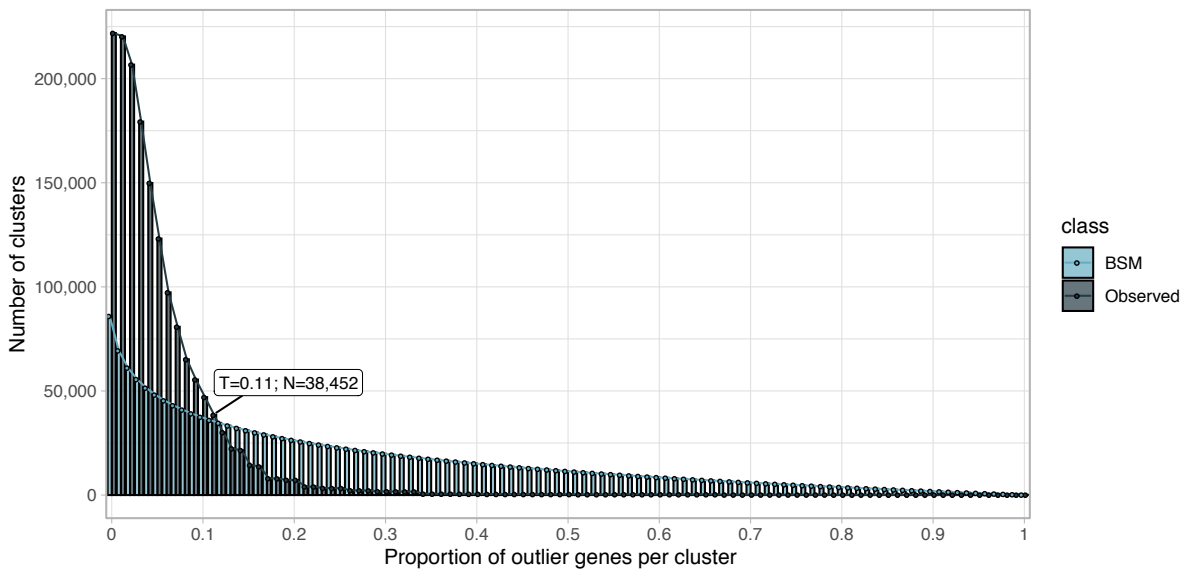

285

286 **Supplementary Figure 4-1.** Proportion of outlier genomic genes identified within each  
 287 cluster MSA. Distribution of observed values compared with those of the Broken-stick model.

288

289 **Supplementary Table 4-2.** Genomic GC validation results.

290 (A) Evaluation of cluster sequence composition.

|       | Pre-Compos. validation | good quality | bad quality |
|-------|------------------------|--------------|-------------|
| GCs   | 2,400,037              | 2,361,585    | 38,452      |
| Genes | 20,718,376             | 20,364,454   | 353,922     |

291 (B) Evaluation of Pfam functional annotations.

|       | Pre-Funct. validation | good quality | bad quality |
|-------|-----------------------|--------------|-------------|
| GCs   | 556,834               | 542,410      | 14,424      |
| Genes | 10,091,203            | 9,865,550    | 225,653     |

292 (C) Combined cluster validation results.

|       | Pre-validation | good quality | bad quality |
|-------|----------------|--------------|-------------|
| GCs   | 2,400,037      | 2,347,502    | 52,535      |
| Genes | 20,718,376     | 20,141,636   | 576,740     |

293

294 **Supplementary Table 4-3.** Spurious, shadow and outlier genes in the genomic GCs.

| Gene category | GCs >= 2 genes | Singletons |
|---------------|----------------|------------|
| Spurious      | 3,252          | 1,312      |
| Shadow        | 223,535        | 125,262    |
| Outliers      | 449,080        | -          |

295

296 **Supplementary Table 4-4.** Non-annotated genomic GC classification.

297 (A) Results from the search against the UniRef90 database.

| Search vs UniRef90     | Hits          |              | No-hits |
|------------------------|---------------|--------------|---------|
| Initial GCs: 1,816,999 | 1,570,094     |              | 246,905 |
|                        | Characterized | Hypothetical |         |
|                        | 304,004       | 1,266,090    |         |

298

299 (B) Results from the search against the NCBI nr database.

| Search vs NCBI nr    | Hits          |              | No-hits |
|----------------------|---------------|--------------|---------|
| Initial GCs: 246,905 | 28,704        |              | 218,201 |
|                      | Characterized | Hypothetical |         |
|                      | 1,280         | 27,424       |         |

300 (C) Classification of the Pfam annotated GCs based on the consensus DAs.

| Consensus DA analysis | DKF DAs | DUF DAs |
|-----------------------|---------|---------|
| Initial GCs: 993,520  | 912,551 | 65,688  |

301

302 **Supplementary Table 4-5.** Genomic GC remote homology refinement and final genomic  
303 GC dataset.

304 (A) Remote-homology refinement steps.

|                    | K        | KWP      | GU        | EU       |
|--------------------|----------|----------|-----------|----------|
| Initial GCs        | 464,815  | 305,284  | 1,359,202 | 218,201  |
| EU refinement      | -        | +5,704   | +144,295  | -149,999 |
| Post-EU refinement | 464,815  | 310,988  | 1,503,497 | 68,202   |
| KWP refinement     | +152,529 | -174,582 | +22,053   | -        |
| Refined GCs        | 617,344  | 136,406  | 1,525,550 | 68,202   |

305 (B) Genomic GC refined dataset.

|       | K         | KWP     | GU        | EU      | Total      |
|-------|-----------|---------|-----------|---------|------------|
| Genes | 9,997,529 | 663,107 | 9,305,621 | 175,379 | 20,141,636 |
| GCs   | 617,344   | 136,406 | 1,525,550 | 68,202  | 2,347,502  |

306

307 **Supplementary Table 4-6.** Genomic high quality (HQ) GCs.

| Category | HQ GCs | HQ genes   | pHQ GCs | pHQ genes |
|----------|--------|------------|---------|-----------|
| K        | 12,202 | 25,105,156 | 0.0198  | 0.0096    |
| KWP      | 4,019  | 1,349,165  | 0.0295  | 0.0214    |
| GU       | 12,699 | 8,403,393  | 0.0083  | 0.0062    |
| EU       | 438    | 471,820    | 0.0064  | 0.0074    |

308

309 **Supplementary Table 4-7.** MG + GTDB seed database. Integrated number of genes and  
310 GCs per category.

|       | K          | KWP        | GU         | EU        | Total       |
|-------|------------|------------|------------|-----------|-------------|
| Genes | 230,641,76 | 32,754,365 | 68,509,335 | 3,534,207 | 335,439,673 |
| GCs   | 1,667,510  | 768,859    | 2,647,359  | 204,031   | 5,287,759   |

311

312



## 313 Supplementary Note 5 – Summary of the post-genomic 314 integration dataset

315 *In-detail description of the integrated metagenomic-genomic dataset.*

316

317 The integration of 93,723,190 genomic genes into the metagenomic dataset (322,248,552  
318 genes, 32,465,074 GCs) resulted into a dataset of 415,971,742 genes and 40,423,549 GCs  
319 (Supp. Fig. 2A and Supp. table 4-1). As shown in Supp. Figure 2A, the integrated dataset is  
320 divided into: (1) “kept” GCs and (2) “discarded” GCs.

### 321 1. The “kept” GCs.

322 The “kept” GC dataset contains the 2,940,257 metagenomic “kept” GCs with 260,142,354  
323 genes (Supp. Fig. 2A), the genomic “kept” 2,347,502 GCs with 20,141,636 genes (Supp.  
324 Table 4-5B), plus 55,155,683 genomic genes found in the metagenomic set of “kept” GCs  
325 (Supp. Table 5-1), for a total of 5,287,759 GCs and 335,439,673 genes. A description of the  
326 integrated “kept” dataset numbers of GCs and genes, and their distribution in the different  
327 categories can be found in Supp. Figure 2A and Supp. Table 4-7.

### 328 2. The “discarded” GCs.

329 The metagenomic “discarded” set includes 8,325,409 genes and 63,640 GCs classified as  
330 “bad” during the validation and refinement processes (Supp. Note 2), 19,911,324 singletons  
331 and 33,869,465 genes in 9,549,853 small GCs, i.e. clusters with less than 10 genes (Supp.  
332 Note 1), for a total of 62,106,198 genes and 29,524,817 GCs.

333 The genomic “discarded” dataset consists of 576,740 genes and 52,535 GCs classified as  
334 “bad”, 5,558,438 singletons (Supp. Note 4) and 12,290,693 genomic genes found in  
335 1,223,730 metagenomic discarded clusters. This last set of genes, labeled as “Other” in  
336 Supp. Figure 2A, includes 1,578,862 genomic genes found in the set of metagenomic “bad”  
337 clusters, 7,010,987 genomic genes found in the metagenomic small GCs and 3,700,844  
338 genomic genes homologous to metagenomic singletons (Supp. Table 5-1).

339 The integration of the metagenomic and genomic “discarded” sets resulted in 80,532,069  
340 genes and 35,135,790 GCs.

341 As described above, with the integration of genomic data we enriched metagenomic  
342 singletons and small GCs. This addition resulted in a set of 52,758 metagenomic singletons  
343 and 187,953 metagenomic small GCs becoming GCs with more than ten genes. We  
344 validated and classified the 240,711 GCs in this set. We obtained 223,229 good-quality GCs,  
345 divided into 17,383 K, 89,205 KWP, 109,636 GU and 7,005 EU.

346

347 **Supplementary Table 5-1.** Overview of genomic genes found homologous to metagenomic  
348 genes.

|       | Total      | In MG good-quality GCs | In MG small GCs | In MG singletons | In MG bad-quality GCs |
|-------|------------|------------------------|-----------------|------------------|-----------------------|
| Genes | 67,446,376 | 55,155,683             | 7,010,987       | 3,700,844        | 1,578,862             |

349

350

351

## 352 Supplementary Note 6 - Gene cluster additional information

353 *Additional information on the metagenomic and genomic (MG + GTDB) gene cluster dataset.*

354

355 We retrieved a set of statistics for the MG + GTDB GC dataset, including the proportion of  
356 complete genes per cluster, the average gene length, the cluster level of darkness and  
357 disorder, and a cluster consensus taxonomic affiliation. The methods we applied to obtain  
358 these statistics are described in the Methods-Gene cluster characterization paragraph.  
359 Overall the K category has the largest average GC size, 139.6 genes (and a max of 168,822  
360 genes). The average GC size is then decreasing from the known to the unknown categories,  
361 with the EU presenting the smallest average size, with 17.36 genes per GC. Similarly, the K  
362 GCs have, on average, the longest genes (258.55 aa), followed by the GU (177.16 aa), the  
363 KWP (133.22 aa) and the EU (130.65 aa). The unknown categories (GU and EU) have the  
364 highest level of completion, i.e., the proportion of complete genes per GC. The KWP GCs  
365 contain the smallest percentage of complete genes. We evaluated the levels of darkness  
366 and disorder of the GCs using the information on the DPD<sup>18</sup> annotations (Supp. Table 6-1).  
367 The categories K, KWP and GU showed a degree of darkness inversely proportional to their  
368 functional characterization. Interestingly the KWP presented the highest level of disorder  
369 (Supp. Table 6, Supp Fig 3), while the proper characterization of these proteins is beyond  
370 the scope of this paper, our preliminary analyses suggest that KWP are enriched in  
371 intrinsically disordered proteins<sup>19</sup> (Supp. Table 6-1). These proteins, usually involved in  
372 signaling and regulatory functions, don't have a well-defined 3-D structure and they can  
373 adopt many different conformations.

374 We used the taxonomy of 214,392,608 genes to evaluate the taxonomic variation within a  
375 GC and generated consensus taxonomic annotations for 2,630,338 GCs. The GCs  
376 taxonomic variation is low at higher taxonomic levels and it steadily increases towards  
377 Genus and Species (Supp. Table 5).

378 A general overview of the MG + GTDB main properties for the whole GCs dataset can be  
379 found in Supplementary Table 5 (Supplementary\_tables\_2.xlsx).

380

381 **Supplementary Table 6-1.** Number of MG + GTDB GCs annotated to the DPD per  
382 functional category.

| K       | KWP   | GU     | EU |
|---------|-------|--------|----|
| 374,555 | 8,874 | 22,135 | 0  |

383

384

## 385 Supplementary Note 7 - Gene cluster communities

386 *Metagenomic and genomic gene cluster community inference detailed results.*

387

388 We aggregated the gene clusters (GCs) into gene cluster communities (GCCs) based on  
389 their shared distant homologies, which couldn't be detected with the sequence similarity  
390 approach. The GCC inference, described in the Methods-Cluster communities inference  
391 section, was implemented and tuned on the known coding sequence space (CDS-space),  
392 which is constrained by the domain architectures (DAs). Then, we used the information  
393 retrieved for the known CDS-space to aggregate the unknown GCs. Since the number of  
394 DAs in the known GCs may be inflated due to the fragmented nature of metagenomic genes,  
395 a key step for the inference process was the retrieval of a set of non-redundant DAs  
396 (Methods - **A set of non-redundant domain architectures** section).

397 We reduced the complete set of 29,341 Pfam DAs found in the metagenomic dataset, to  
398 23,681 non-redundant DAs, and the 38,765 Pfam DAs found in the genomic dataset to  
399 38,060 non-redundant DAs.

400 To find how the different clusters aggregate at the DA level, we then applied a combination  
401 of HMM-HMM searches and community identification using the Markov Cluster Algorithm  
402 (MCL)<sup>20</sup> (see Methods - **Cluster communities inference**). MCL is very sensitive to the  
403 inflation value, which determines the granularity of the partitioning. The results of our  
404 iterative approach are summarized in the radar plots of Supplementary Figure 7-1. We  
405 determined the best inflation value at 2.2 for the metagenomic dataset, value corresponding  
406 to the radar plot with the largest area (Supp. Fig. 7-1A). This value is in agreement with the  
407 value empirically determined to be the optimal<sup>20</sup>. The inference led to a set of 283,314  
408 metagenomic GCCs out of ~2.9M GCs, with a reduction rate of 90% (Supp. Table 7-1A).

409 For the genomic dataset, we first identified the GCs with remote homologies to the  
410 metagenomic GCCs. To do this, we searched the genomic GC HMM profiles against the  
411 metagenomic ones, using HHblits<sup>17</sup> (-n 2 -Z 10000000 -B 10000000 -e 1). We assigned the  
412 genomic GCs sharing a HHblits probability  $\geq 50\%$  and a bidirectional coverage  $> 60\%$  to the  
413 respective metagenomic GCCs. We processed the remaining genomic GCs through the  
414 GCC inference workflow. We determined the best inflation value at 2.5 (Supp. Fig. 7-1B),  
415 which led to the inference of a total of 496,930 GCCs, with a reduction rate of 79% (Supp  
416 Table 7-1B). The numbers of identified cluster GCCs for each category are shown in  
417 Supplementary Table 7-1.

418

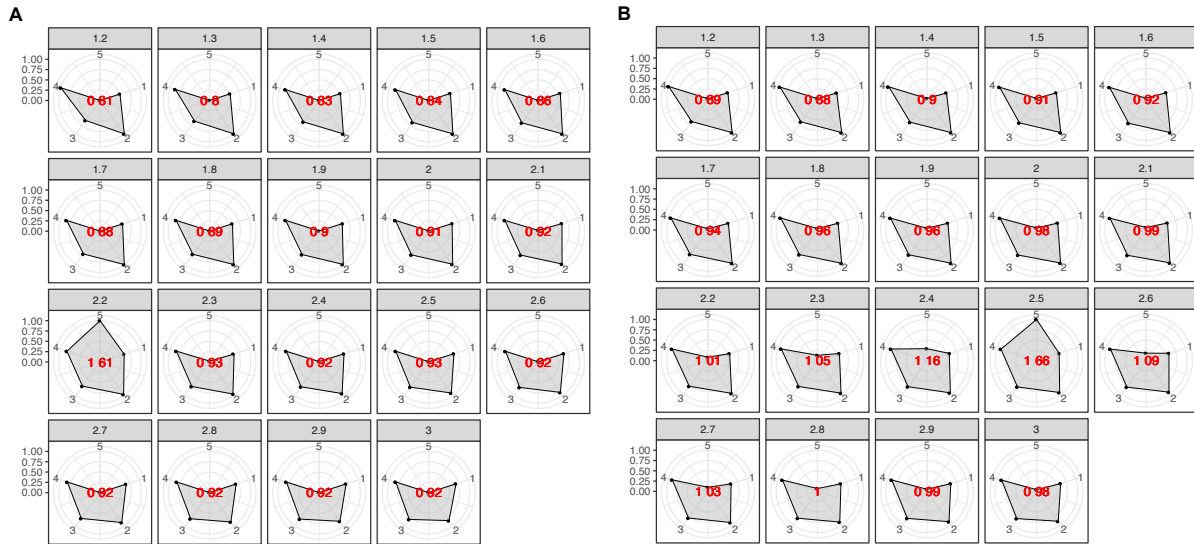

419  
 420 **Supplementary Figure 7-1.** Radar plots used to determine the best MCL inflation value for  
 421 the partitioning of the K into cluster components. The plots were built using a combination of  
 422 five variables: 1=proportion of clusters with one component and 2=proportion of clusters with  
 423 more than one member, 3=clan entropy (proportion of clusters with entropy = 0), 4=intra  
 424 HHblits-Score/Aligned-columns (normalized by the maximum value), and 5=number of  
 425 clusters (related to the non-redundant set of DAs). (A) Metagenomic dataset. (B) Genomic  
 426 dataset.

427 **Supplementary Table 7-1.** Number of gene clusters, cluster communities and reduction rate  
 428 shown by functional category.

429 (A) Metagenomic dataset (MG)

|               | K         | KWP     | GU        | EU      | Total     |
|---------------|-----------|---------|-----------|---------|-----------|
| Clusters      | 1,050,166 | 632,453 | 1,121,809 | 135,829 | 2,940,257 |
| Communities   | 24,181    | 64,938  | 146,100   | 48,095  | 283,314   |
| Reduction (%) | 97.7      | 89.73   | 86.98     | 64.59   | 90.36     |

430 (B) Genomic dataset (GTDB)

|               | K       | KWP     | GU        | EU     | Total     |
|---------------|---------|---------|-----------|--------|-----------|
| Clusters      | 617,344 | 136,406 | 1,525,550 | 68,202 | 2,347,502 |
| Communities   | 52,360  | 47,203  | 339,468   | 57,899 | 496,930   |
| Reduction (%) | 91.52   | 65.39   | 77.75     | 15.11  | 79.30     |

431

432



## 434 Supplementary Note 8 - Gene cluster community validation

435 *The biological significance of the gene cluster communities (GCC) was tested by exploring*  
436 *their distribution within the phylogeny of proteorhodopsin and a set of ribosomal protein*  
437 *families.*

### 438 **Methods**

439

440 *Analysis of the GCC distribution within the proteorhodopsin phylogeny.*

441 We searched the proteorhodopsin (PR) HMM profiles from Olson et al.<sup>21</sup> against the K and  
442 KWP cluster consensus sequences, using the hmmsearch program of the HMMER software  
443 (version 3.1b2)<sup>22</sup>. We filtered the results for alignment coverage > 0.4 and e-value  $\geq 1e-5$ .  
444 The filtered results were placed in the MicRhoDE PR tree<sup>23</sup> using pplacer<sup>24</sup>. Then we placed  
445 the query PR sequences into the MicRhode<sup>23</sup> PR tree. We de-duplicated the placed queries  
446 with CD-HIT (v4.6)<sup>25</sup> and we cleaned them from sequences with less than 100 amino acids  
447 using SEQKIT (v0.10.1) (Shen et al. 2016). Next, we calculated the best substitution model  
448 using the EPA-NG modeltest-ng (v0.3.5)<sup>26</sup> and we optimized the MicRhoDE PR tree initial  
449 parameters and branch lengths using RAxML (v8.2.12)<sup>27</sup>. Afterward, we incrementally  
450 aligned the query PR sequences against the PR tree reference alignment using the PaPaRA  
451 (v2.5) software<sup>28</sup>. We divided the query alignment and the reference alignment using EPA-  
452 NG -split v0.3.5. We combined the PR tree with the related contextual data and the tree  
453 alignment, into a phylogenetic reference package using Taxtastic (v0.8.9), and we placed  
454 the PR query sequences in the tree using pplacer (v1.1.alpha19-0-g807f6f3)<sup>24</sup> with the  
455 option -p (-keep-at-most) set to 20. We grafted the PR tree with the query sequences using  
456 Guppy, a tool part of pplacer. 3. As the last step, we assigned the PR Supercluster affiliation  
457 to the query sequence, transferring the annotation of its closest relative in the MicRhoDE  
458 tree<sup>23</sup> the R packages APE v5.3 and phangorn v2.5.3<sup>29</sup>.

459 Furthermore, we aligned the query sequences annotated as viral to the six viral PRs from  
460 Needham et al. 2019<sup>30</sup>, using Parasail<sup>31</sup> (-a sg\_stats\_scan\_sse2\_128\_16 -t 8 -c 1 -x). We  
461 then built a sequence similarity network (SSN) using the sequence similarity values to weight  
462 the graph edges.

463

464 *Analysis of standard and high-quality GCCs distribution within ribosomal protein families.*

465 As an additional evaluation, the distributions of standard GCCs and HQ GCCs within  
466 ribosomal protein families were investigated and compared. The ribosomal proteins used for  
467 the analysis were obtained combining the set of 16 ribosomal proteins from Méheust et al.<sup>32</sup>  
468 and those contained in the collection of bacterial single-copy genes of Anvi'o<sup>33</sup>, that can be

469 downloaded from  
470 ([https://github.com/merenlab/anvio/blob/master/anvio/data/hmm/Bacteria\\_71/genes.txt](https://github.com/merenlab/anvio/blob/master/anvio/data/hmm/Bacteria_71/genes.txt)).

471

## 472 **Results**

473

474 The results of both distribution analyses are shown in Figure 2D and 2C, respectively, and  
475 described in the main text.

476 We found 63 of the viral genes placed in the PR tree showing an average similarity of 50%  
477 with the viral PR of Needham et al.<sup>30</sup> (Suppl. Table 8-1). Additionally, we found two genes  
478 (from two TARA samples: TARA\_093\_SRF\_0.22-3 and TARA\_145\_SRF\_0.22-3) sharing a  
479 similarity of 100% with one of the Needham et al. PRs (ChoanoV2\_VirRyml\_1). These  
480 genes, however, were not placed in the PR tree.

481

482 **Supplementary Table 8-1.** Sequence similarity values between viral genes and Needham  
483 et al. viral PRs. (Supplementary\_tables\_1.xlsx).



## 484 Supplementary Note 9 - HMM-HMM homology network 485 weighting metrics

486 *Validation of the edge weight metrics used for the gene cluster homology network*  
487 *community inference.*

488

### 489 **Methods**

490 A critical step in the gene cluster community (GCC) inference relies on the determination of  
491 the edge weights for the GC HMM-HMM network. We tested two possible metrics to weight  
492 the GC homology network resulting from the all-vs-all HMM GC comparison with HHblits<sup>17</sup>:  
493 (1) the ratio between the HHblits score and the number of aligned columns (*HHblits-*  
494 *Score/Aligned-columns*), metric chosen in this paper; (2) the maximum(*HHblits-probability* x  
495 *coverage*), weight used in Méheust et al. (2019)<sup>32</sup>. In addition, we tested the two different  
496 metrics using the ribosomal protein families as reference. For this second test, we filtered  
497 the GCCs for those annotated to the 16 ribosomal proteins used in Méheust et al.<sup>32</sup>, and  
498 those contained in the collection of bacterial single-copy genes of Anvi'o<sup>33</sup>, which can be  
499 downloaded from  
500 [https://github.com/merenlab/anvio/blob/master/anvio/data/hmm/Bacteria\\_71/genes.txt](https://github.com/merenlab/anvio/blob/master/anvio/data/hmm/Bacteria_71/genes.txt). To  
501 then compare the two metrics, we used the functions of the R package *aricode*  
502 (<https://github.com/jchiquet/aricode>)<sup>34</sup>, which allow comparisons between clustering  
503 methods.

504

### 505 **Results**

506 The results of the test of the different HHblits metrics used to weight the GC homology  
507 network are shown separately in Supplementary Figure 9-1 and the comparison in  
508 Supplementary Figure 9-2. Both metrics present a very different behavior (Supplementary  
509 Figure 9-1), the metric used in Méheust et al. is rescaling the *HHblits-probability*  
510 (Supplementary Figure 9-2). While the *HHblits-probability* is useful for deciding if two HMMs  
511 are reliable homologs, it is not suitable for measuring similarities due to its dependence on  
512 the length of the alignment. On top of this, we can see how the *HHblits-Score/Aligned-*  
513 *columns* values present a similar and more homogenous distribution in all four categories,  
514 being more suitable for the MCL clustering.

515 Overall, our approach generated fewer GCCs, as can be observed in Supplementary Figure  
516 9-3. Our clustering was found closer to the "ground truth" represented by the ribosomal  
517 protein families compared to the partitioning proposed by Méheust et al. The results from the

518 comparison between the two clustering approaches and the ribosomal protein reference are  
 519 reported in Supplementary Table 9-1.  
 520

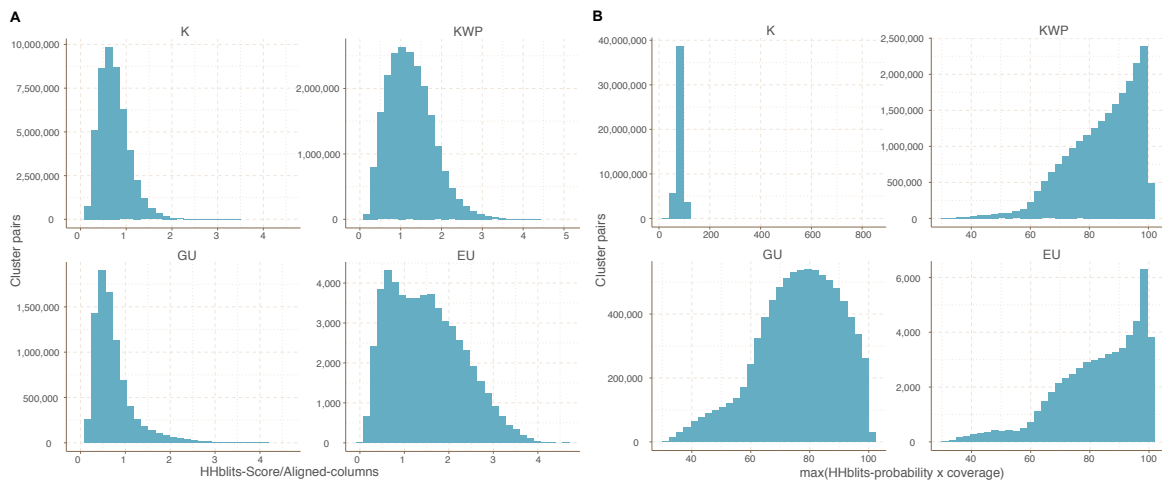

521  
 522 **Supplementary Figure 9-1.** Cluster pairs distribution based on the metrics used to weight  
 523 the gene cluster HMM-HMM homology network. (A) HHblits-Score/Aligned-columns (Vanni  
 524 et al.). (B) maximum(HHblits-probability x coverage) (Méheust et al.).  
 525

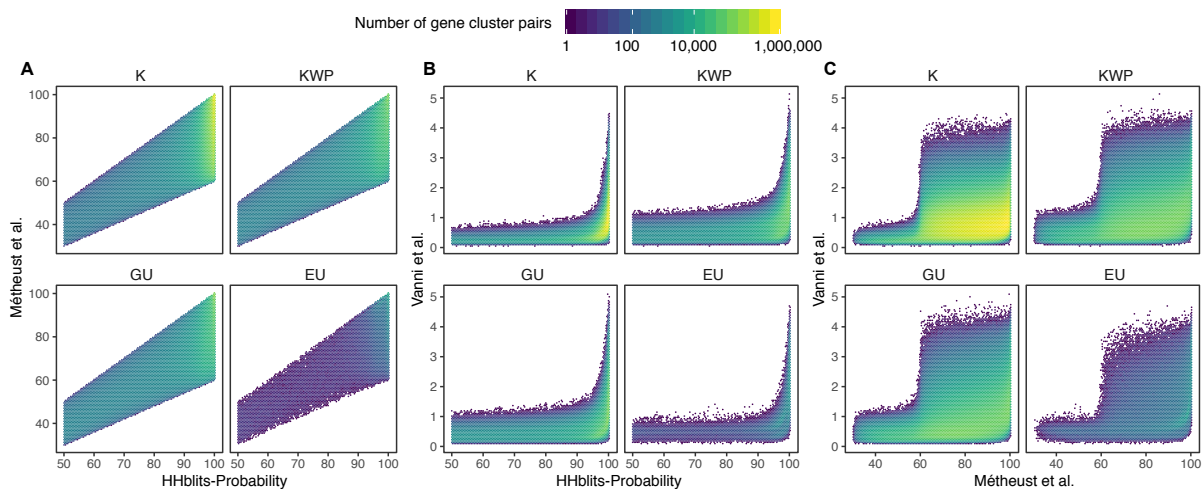

526  
 527 **Supplementary Figure 9-2.** Determination of the edge-weight metrics for the GC HMM-  
 528 HMM homology network. We tested the metrics used in Méheust et al. and this paper (Vanni  
 529 et al.). The correlations between metrics are shown per functional category. The metric used  
 530 by Méheust et al. corresponds to the maximum(HHblits-probability x coverage). The metric  
 531 applied in this manuscript is *HHblits-Score/Aligned-columns*. (A) Comparison between the  
 532 metric of Méheust et al. and the HHblits-Probability. (B) Comparison between the metric  
 533 used in this manuscript and the HHblits-Probability. (C) Comparison between the metric  
 534 used in this manuscript and the metric of Méheust et al.  
 535

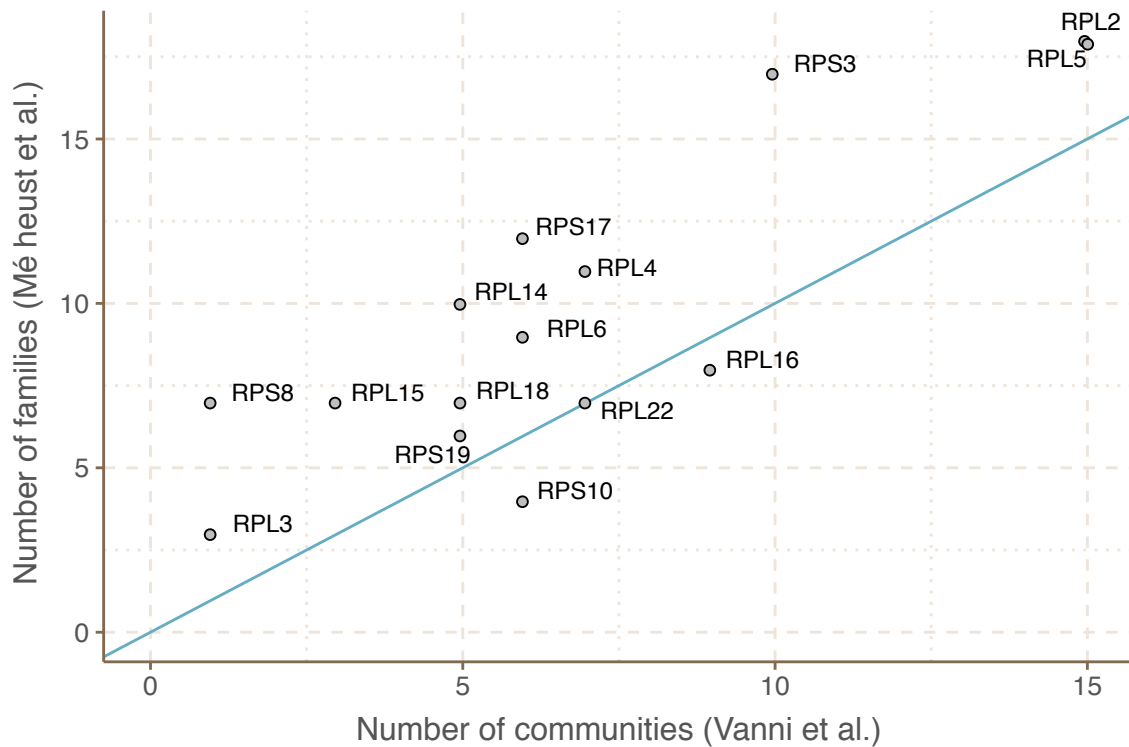

536

537 **Supplementary Figure 9-3.** Agreement between the number of communities within  
 538 ribosomal protein families between our approach and the one described in Méheust et al.

539

540 **Supplementary Table 9-1.** Measures of similarity between the community inference  
 541 approach proposed in this paper, the one used in Méheust et al. and the "ground truth"  
 542 represented by the ribosomal protein families.

|     | Vanni et al. vs Meheust et al. | Vanni et al. vs ribosomal families | Meheust et al. vs ribosomal families |
|-----|--------------------------------|------------------------------------|--------------------------------------|
| ARI | 0.915                          | 0.944                              | 0.906                                |
| AMI | 0.928                          | 0.916                              | 0.878                                |
| NVI | 0.101                          | 0.0858                             | 0.124                                |
| NID | 0.0717                         | 0.0841                             | 0.122                                |
| NMI | 0.928                          | 0.916                              | 0.878                                |

543 **Note:** ARI=Adjusted Rand Index; AMI=Adjusted Mutual Information; NVI=Normalized Variation  
 544 Information; NID=Normalized Information Distance; NMI=Normalized Mutual Information.

545

## 546 Supplementary Note 10 - EU gene cluster in metagenome- 547 assembled genomes

548 *Metagenome-assembled genomes (MAGs) as a resource to contextualize the environmental*  
549 *unknown gene clusters and cluster communities.*

550

551 Overall, the MG+GTDB integrated cluster dataset contains 204,031 EU gene clusters (GCs)  
552 (grouped in 103,195 cluster communities (GCCs)). The EUs are divided into 127,032  
553 metagenomic, 70,470 genomic, and 9,024, both metagenomic and genomic GCs. The last  
554 two subsets contain 52,231 (26%) EU found in GTDB metagenome-assembled genomes  
555 (MAGs). To test whether we could also place the subset of metagenomic EU in the context  
556 of MAGs, we searched the GCs of this set against the manually curated TARA Ocean MAG  
557 collection from Delmont et al. <sup>35</sup>.

558 In addition, we deepened the investigation of the metagenomic EU subset, focusing on the  
559 GCCs found broadly distributed in metagenomes according to the results of Levin's niche  
560 breadth analysis (Fig. 4). The details of the metagenomic EU analysis are described below.

561

### 562 **Methods**

563 We searched the metagenomic EU GCs HMM profiles, obtained from the cluster MSA using  
564 the *hmake* program of the *HH-SUITE*<sup>7</sup>, against the set of 957 high-quality MAGs binned  
565 from the TARA Ocean prokaryotic dataset<sup>35</sup>. We performed the sequence-profile search  
566 using the *MMSeqs2 search* program <sup>13</sup>, using `-e 1e-20 --cov-mode 2 -c 0.6`. We filtered the  
567 results to keep the hits within 90% of the  $\log_{10}(\text{best-e-value})$ . We applied a majority vote  
568 function to retrieve the consensus category for each hit. Then, we sorted the results by the  
569 smallest e-value and the largest query and target coverage to keep only the best hits. We  
570 then filtered the search results focusing on the broadly distributed EU GCs and GCCs. We  
571 retrieved MAG contigs containing the EU GCs and GCCs from the Anvi'o MAG profiles using  
572 the program *anvi-export-gene-calls* from Anvi'o v4<sup>33</sup>. We functionally annotated the contigs  
573 searching their genes against the Pfam database (v. 31.0)<sup>6</sup>, using the *hmmsearch* program  
574 from the *HMMER* package (version: 3.1b2)<sup>22</sup>, and complementing the search using *Prokka*<sup>36</sup>  
575 in metagenomic mode. We then selected the contig with the lowest percentage of  
576 hypothetical proteins, and we extracted a region of 1kb surrounding the genes mapping to  
577 the EU GCCs.

578

### 579 **Results**

580 We found a total of 5,420 EU clusters homologous to 7,661 genes in the 691 TARA MAGs.  
581 These EU clusters belong to 4,365 GCCs. We kept only the 71 EU GCCs that showed a  
582 broad distribution in TARA samples. These GCCs contained 3,119 clusters and were found  
583 in 83 different TARA MAGs. Next, we examined the genomic neighborhood of the broad  
584 distributed EU on the MAG contigs. Investigating the genomic neighborhood can lead to the  
585 inference of a possible function of the EU. We selected the MAG most enriched with broadly  
586 distributed EU, which resulted in being the Atlantic North-West MAG  
587 "TARA\_ANW\_MAG\_00076" (Supp. Fig. 10-1A). This MAG contains 23 EU (0.3%) of its  
588 genes. It belongs to the bacterial order of *Flavobacteriales*. Of its 1,283 contigs, 317 include  
589 at least one EU. We functionally annotated these contigs with Prokka (and Pfam). Then, we  
590 sorted the contigs based on the proportion of genes annotated to hypothetical or  
591 characterized proteins, as shown in Supplementary Figure 10-1B. The presence of genes of  
592 known function around the EU contributes to prove that these unknown genes are part of a  
593 real contig, and possibly an operon. Therefore, we selected for exploration, the contigs with  
594 the highest proportion of characterized genes, "TARA\_ANW\_MAG\_00076\_000000000672",  
595 with 7 characterized genes out of a total of 13 annotated genes. The contig with the second  
596 least amount of hypothetical proteins was "TARA\_ANW\_MAG\_00076\_000000001247",  
597 which contained nine characterized genes out of 20. The contig  
598 "TARA\_ANW\_MAG\_00076\_000000000672" is shown in Supplementary Figure 10-1C and  
599 highlighted in red are the two predicted genes with significant homology to the EU GCs,  
600 members of the broadly distributed EU GCCs eu\_com\_769 and eu\_com\_5081. Within their  
601 genomic neighborhood, we observe genes relating to nucleotide metabolism, DNA repair  
602 and phosphate regulation/sensing, including dUTPase, phoH and protein RecA. Gene  
603 placement in prokaryotic genomes is not random. Genes are grouped to increase  
604 transcriptional efficiency to respond to stimuli in the environment. Therefore, we can  
605 hypothesize that these EU have functions related to their neighboring genes.

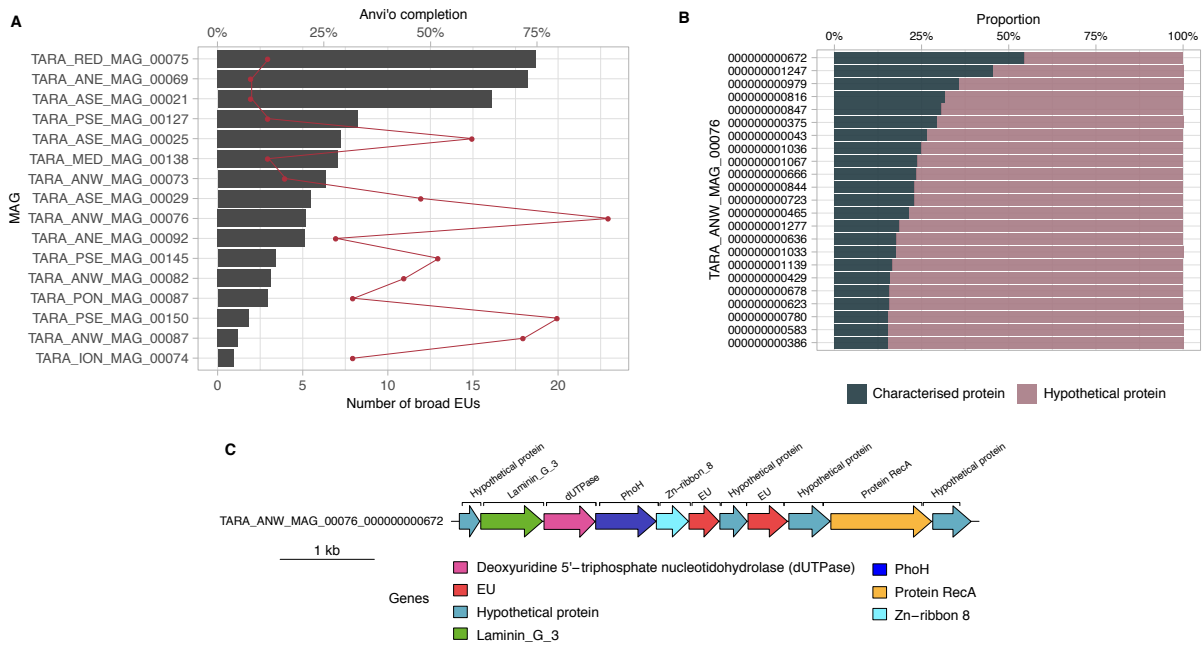

606  
 607  
 608  
 609  
 610  
 611  
 612  
 613

**Supplementary Figure 10-1.** (A) EU mapping on TARA MAGs results. Histogram of TARA MAG percent completeness (checkM). The red line represents the number of EU found in the MAGs. (B) Contigs from TARA MAGs TARA\_MAG\_00076 in descending order of highest proportion of non-hypothetical gene content. (C) EU communities in the context of a MAG contig. Contig genomic neighborhood around two potential EU communities.

614 **Supplementary Note 11 - Singletons effect on the coding**  
 615 **sequence space diversity**

616 *Insights into the metagenomic and genomic singletons and their influence on the gene*  
 617 *cluster rate of accumulation.*

618  
 619 Singletons represent a significant fraction in both the metagenomic (60%) and genomic  
 620 (55%) datasets. Although we discarded them from the primary analyses presented in this  
 621 paper, we analyzed their composition in terms of functional categories. The analysis steps  
 622 are described for the metagenomic singletons in Supplementary Note 1, and, after the  
 623 integration, we applied the same steps to the genomic singletons (Supp. Table 11-1). As  
 624 shown in Supp. Note 1, the metagenomic singletons are highly represented by EU genes,  
 625 while in the genomes we observed the majority of the singletons shared between GU and  
 626 EU. In general, the singletons are characterized by a high percentage of genes of unknown  
 627 function.

628 We tested the singletons role in the rate of accumulation of GCs and GCCs as a function of  
 629 the number of genomes and metagenomes, as shown in Figure 3C and 3D (to be compared  
 630 with Supp. Fig. 5A and 5B). For the metagenomic collector curves, we included only the  
 631 singletons with a sample abundance of 8.36. This value corresponds to the mode sample  
 632 abundance of the set of metagenomic singletons that became clusters with more than ten  
 633 genes after the integration of the genomic data.

634 We observed that, excluding the 19,911,324 singletons from the metagenomic dataset, the  
 635 accumulation curves of the GCs flatten and approach a plateau. The same effect is  
 636 observed, excluding the set of 5,558,438 singletons from the genomic dataset (Supp. Fig.  
 637 5B; Supp Table 11-2).

638

639 **Supplementary Table 11-1.** Number of genomic singletons per functional category.

|       | K       | KWP     | GU        | EU        |
|-------|---------|---------|-----------|-----------|
| Genes | 473,460 | 896,127 | 2,528,370 | 1,660,481 |

640

641

642 **Supplementary Table 11-2.** Minimum slope values for the collector curves.

643 (A) Excluding singletons. In parenthesis, the number of genomes or metagenomes for  
 644 the first occurrence of slope < 1

|               |                          |
|---------------|--------------------------|
| Gene Clusters | Gene cluster Communities |
|---------------|--------------------------|

|         | metaG    | GTDB  | metaG        | GTDB           |
|---------|----------|-------|--------------|----------------|
| Known   | 209.235  | 6.556 | 0.1344 (440) | 0.07 (15,120)  |
| Unknown | 374.5147 | 5.851 | 0.1375 (600) | 0.621 (27,690) |

645 (B) Including singletons (with a mode abundance in the samples of 8.36).

|         | Gene Clusters |         |
|---------|---------------|---------|
|         | metaG         | GTDB    |
| Known   | 1329.489      | 66.063  |
| Unknown | 4843.570      | 158.891 |

646

647

648



## 649 Supplementary Note 12 - Coverage of external databases

650 *Analysis of the coverage, by our metagenomic dataset, of seven external microbial gene and*  
651 *gene cluster datasets.*

652

### 653 **Methods**

654 We searched seven different state-of-the-art databases against our dataset of cluster HMM  
655 profiles. The different profile searches were all performed using the MMSeqs2 (version  
656 8.fac81) *search* program<sup>13</sup>, setting an e-value threshold of 1e-20 and a query coverage  
657 threshold of 60% (-e 1e-20 --cov-mode 2 -c 0.6). We kept the hits within 90% of the  
658 log10(best-e-value). Then we applied a majority vote function to retrieve the consensus  
659 functional category for each search hit. In the end, the results were sorted by the lowest e-  
660 value and the largest query and target coverage to keep only the best hits.

661 We applied the described method to the following datasets: the Families of Unknown  
662 Functions (FUnkFams) (61,970 genes)<sup>37</sup>, the Pacific Ocean Virome (POV) (4,238,638  
663 genes)<sup>38</sup> and the Tara Ocean Virome (TOV) (6,642,187 genes)<sup>39</sup>. The Genome Taxonomy  
664 Database (GTDB) (93,723,190 archaeal and bacterial genes)<sup>15</sup>. The *MGNify* proteins from  
665 the EBI metagenomics database (release 2018\_09)<sup>40</sup> (843,535,611 genes). The manually  
666 curated collection of 957 MAGs from TARA metagenomes<sup>35</sup> (TARA MAGs) (2,288,202  
667 genes), and the one made of 92 MAGs, from the fecal microbiota transplantation study (FMT  
668 MAGs) of Lee et al.<sup>41</sup> (188,983 genes). And also the collection of unannotated genes with  
669 mutant phenotypes identified in Price et al. 2018<sup>42</sup> (37,684 mutant genes).

670

### 671 **Results**

672 We found our metagenomic GCs in all the main biomes defined by EBI metagenomics  
673 (Supp. Fig. 6), with an overall coverage of 74% of the MGNify peptides (Supp. Fig. 12-1).  
674 Our GCs also covered 62% of the FUnkFam genes of Wyman et al.; 70% of the GTDB  
675 genes; and 85% of the gene tested for mutant phenotypes in Price et al.. We also covered  
676 50% of the Pacific Ocean Virome proteins, and 77% of the TARA Ocean Virome proteins, for  
677 overall coverage of 70% of the selected viral proteins. The majority of genes from both the  
678 FMT MAGs of Lee et al. and the TARA MAGs of Delmont et al., were found homologous to  
679 genes in our dataset (91% and 77% respectively). With the only exception of the FUnkFams,  
680 and the mutant genes, for which we did not find any homology to EU GCs, the other  
681 datasets reported homologies to clusters from all four functional categories.

682 Moreover, we found that 20% of the Wyman et al FUnkFams and 44% of the unknowns  
683 included in the RB-TnSeq experiments by Price et al., 2018 belong to the known CDS-space  
684 (Supp. Table 12-1).

685

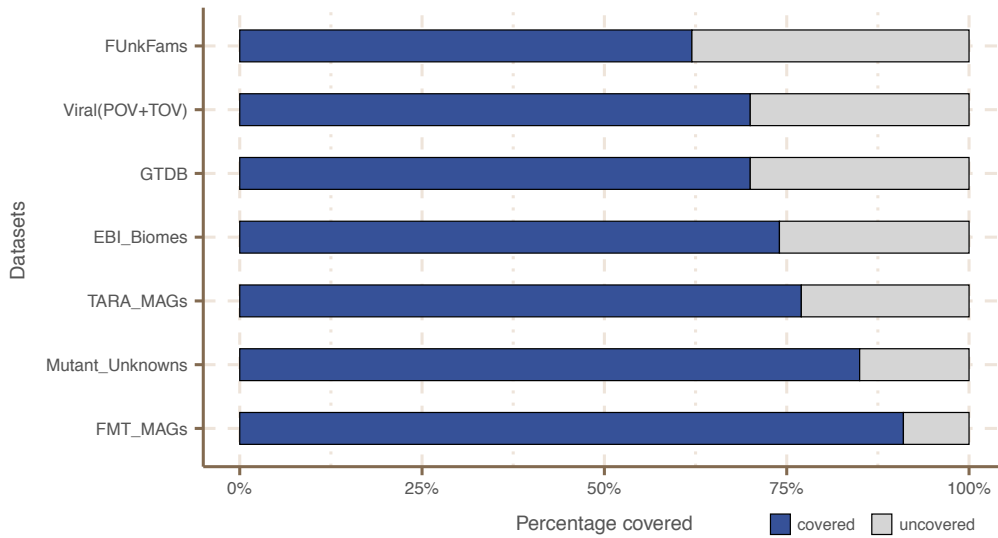

686

687

**Supplementary Figure 12-1.** Coverage of external datasets. The barplot is showing the proportion of covered genes in each of the seven datasets that were screened against the metagenomic set of clusters' HMM profiles.

688

689

690

691

692

**Supplementary Table 12-1.** Re-classification of the unknowns identified in Wyman et al and Price et al.

| Study        | Original unknown set | Covered fraction | Found as known | Found as unknown |
|--------------|----------------------|------------------|----------------|------------------|
| Wyman et al. | 61,970               | 38,174           | 12,366         | 25,808           |
| Price et al. | 49,736               | 33,016           | 21,967         | 11,049           |

693

694

## 695 Supplementary Note 13 - Archaea gene cluster phylogenomic 696 analysis

697 *Gene clusters phylogenetic analysis - results for the archaeal genomes.*

698

699 In the main text are shown the results for the gene clusters (GCs) phylogenetic analyses  
700 (clusters phylogenetic conservation and specificity) for the GTDB bacterial genomes. The  
701 same methods/analyses were applied for the archaeal genomes, and the results are  
702 presented here.

703 Out of the 230,340 GCs found in GTDB archaeal genomes, we identified 48,518 lineage-  
704 specific GCs (precision and sensitivity both  $\geq 95\%$ <sup>43</sup>). As seen for the Bacteria in Figure 5A,  
705 the number of known and unknown archaea lineage-specific GCs increases with the  
706 Relative Evolutionary Distance<sup>15</sup>, with the differences between the known and the unknown  
707 fraction starting to be evident at the Family level (Supp. Fig. 13-1A). The number of unknown  
708 lineage-specific GCs for Family, Genus and Species are 2,937, 12,966 and 21,002  
709 respectively (Supp. Tale 13-1). A total of 34,893 GCs were phylogenetically conserved ( $P <$   
710  $0.05$ ), where 19,693 were known GCs and 15,200 were unknown GCs. Overall, the unknown  
711 GCs are more phylogenetically conserved than the known GCs (Supp. Fig. 13-1B,  $p <$   
712  $0.0001$ ). However, considering only the lineage-specific clusters, we observe the opposite,  
713 the unknown GCs result in less phylogenetically conserved (Supp. Fig. 13-1B). The GTDB  
714 archaeal genomes were also screened for prophages. In total, we identified 2,082 lineage-  
715 specific GCs in prophage genomic regions, and 86% of them resulted in clusters of unknown  
716 function (Supp. Fig. 13-1C). To identify archaeal phyla enriched in unknown GCs, we  
717 partitioned the phyla based on the ratio of known to unknown GCs and vice versa (Supp.  
718 Fig. 13-1D). We observed the same pattern found for bacterial phyla in Figure 5D, where the  
719 archaeal phyla with a larger number of MAGs are enriched in GCs of unknown function  
720 (Supp. Fig. 13-1D).

721

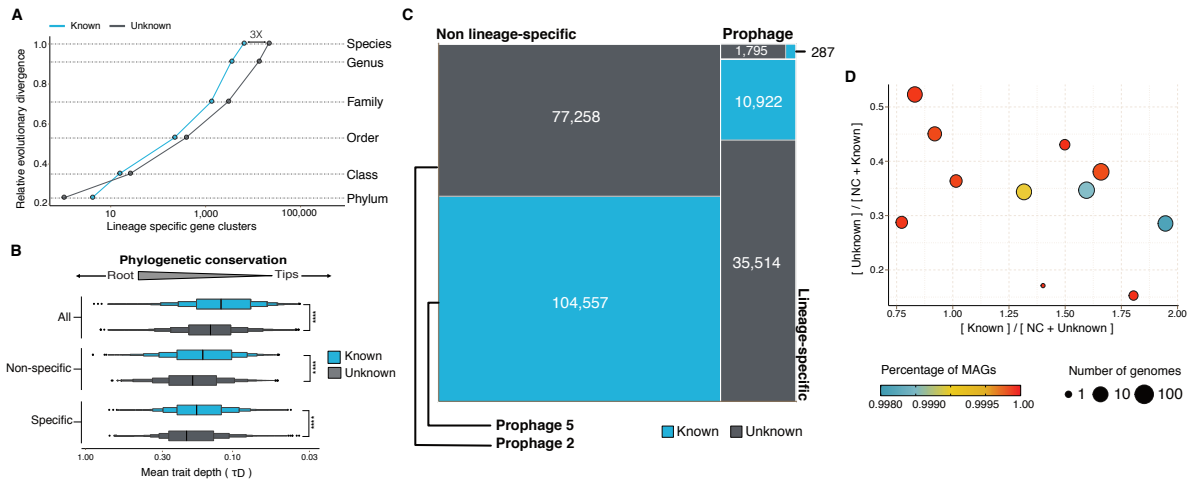

722  
 723 **Supplementary Figure 13-1.** Phylogenomic exploration of the unknown coding sequence space in  
 724 Archaea. (A) Distribution of the lineage-specific gene clusters by taxonomic level. Lineage-specific  
 725 unknown gene clusters are more abundant at the lower taxonomic levels (genus, species). (B)  
 726 Phylogenetic conservation of the known and unknown coding sequence space in 1,569 archaeal  
 727 genomes from GTDB. We calculated the mean trait depth ( $\tau_D$ ) with the consenTRAIT algorithm and  
 728 the lineage specificity using the F1-score approach from <sup>43</sup>. We observe differences in the  
 729 conservation between the known and the unknown coding sequence space for lineage- and non-  
 730 lineage-specific gene clusters (paired Wilcoxon rank-sum test; all p-values < 0.0001). (C) The majority  
 731 of the lineage-specific clusters are part of the unknown coding sequence space, being a small  
 732 proportion found in prophages present in the GTDB genomes. (D) Known and unknown coding  
 733 sequence space of the 1,569 GTDB archaeal genomes grouped by archaeal phyla. Phyla are  
 734 partitioned based on the ratio of known to unknown gene clusters and vice versa from the set of  
 735 genomes. Phyla enriched in Metagenomic assembled genomes (MAGs) have a higher proportion in  
 736 gene clusters of unknown function.

737  
 738 **Supplementary Table 13-1.** Number of phylogenetic conserved and lineage-specific GCs in  
 739 the GTDB archaeal phylogeny. (Supplementary\_tables\_1.xlsx).

740  
 741  
 742

743 **Supplementary Note 14 - *Cand.* Patescibacteria lineage-**  
 744 **specific gene clusters analysis**

745 *The investigation of the lineage-specific clusters was deepened, focusing on those specific*  
 746 *to the *Cand. Patescibacteria* phylum (former Candidate Phyla Radiation-CPR) and analyzing*  
 747 *their cluster distribution in both the Human and marine (TARA and Malaspina)*  
 748 *metagenomes.*

749  
 750 We found two GU clusters phylum-specific, and a total of 54,343 clusters of unknown  
 751 function, lineage-specific within the *Cand. Patescibacteria* phylum (Supp. Table 14-1). The  
 752 majority of this phylum members are particularly poorly understood microorganisms, mostly  
 753 due to undersampling and the incompleteness of the available genomes. Therefore, we  
 754 decided to investigate the distribution in the human and marine (TARA and Malaspina)  
 755 metagenomes of all the clusters lineage-specific inside the *Cand. Patescibacteria* phylum  
 756 (Supp. Fig. 14-1A).

757 We chose to have a closer look at the class of *Gracilibacteria*, which shows to be present in  
 758 both human and marine environments. The first genome for this class was retrieved in a  
 759 hydrothermal vent environment in the deep sea<sup>44</sup>. The same organisms were then also  
 760 identified in an oil-degrading community<sup>44,45</sup> and as a part of the oral microbiome<sup>46</sup>. As  
 761 shown in Supplementary Figure 14-1B, we found both known and unknown clusters lineage-  
 762 specific to this class, distributed in human and marine metagenomes. Among these clusters,  
 763 we observed cases of environment specificity. For instance, three clusters of unknowns  
 764 were found exclusive to HMP samples. These clusters could be proposed as novel targets  
 765 for human-health study since *Gracilibacteria* was found enriched in healthy individuals<sup>46</sup>. We  
 766 also observed lineage-specific clusters of known and unknown functions specific to the  
 767 marine environment.

768 **Supplementary Table 14-1.** Number of lineage-specific clusters within the *Cand.*  
 769 *Patescibacteria* phylum, at different taxonomic levels, subdivided by cluster categories.

| Taxonomic level | K     | KWP | GU     | EU    |
|-----------------|-------|-----|--------|-------|
| Phylum          | 1     | 0   | 2      | 0     |
| Class           | 11    | 0   | 6      | 0     |
| Order           | 41    | 1   | 104    | 0     |
| Family          | 452   | 9   | 1,443  | 13    |
| Genus           | 625   | 98  | 6,649  | 338   |
| Species         | 4,116 | 818 | 42,710 | 3,078 |

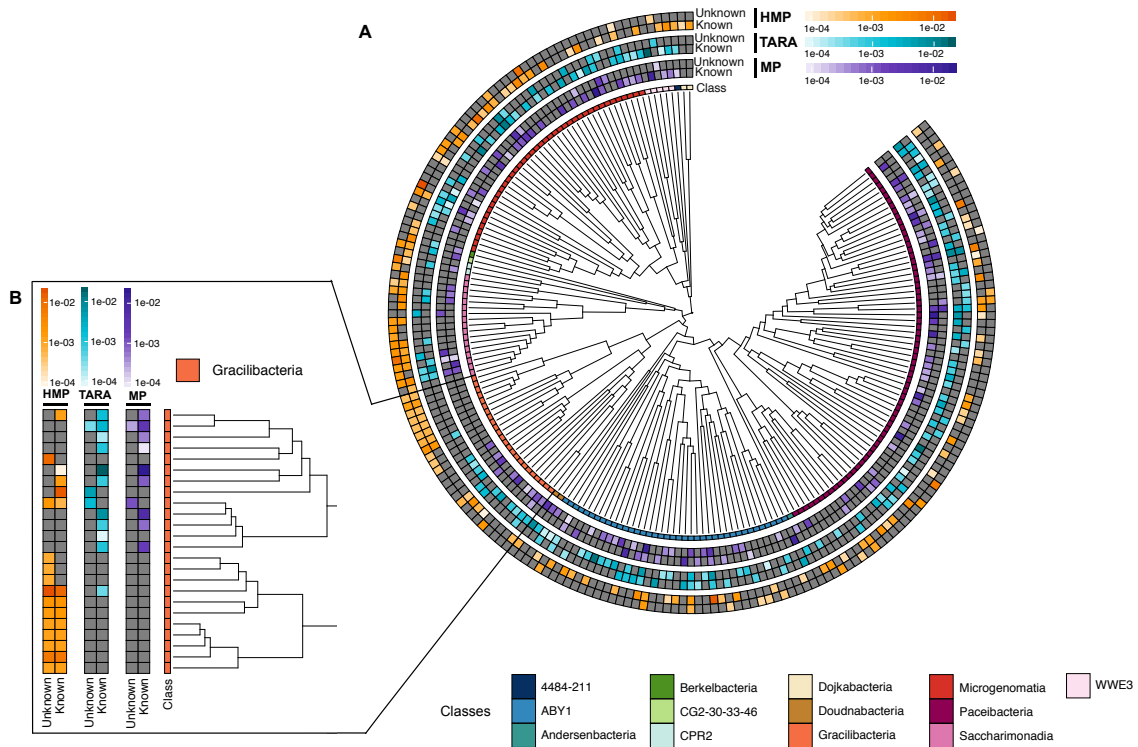

771

772 **Supplementary figure 14-1.** *Cand. Patescibacteria* metagenomic lineage-specific clusters.

773 (A) Phylogenetic tree of *Cand. Patescibacteria* genera, colored by classes. The heatmaps

774 around the tree show the proportion of lineage-specific gene clusters of knowns and

775 unknowns in the metagenomes from TARA, Malaspina and the HMP. (B) Metagenomic

776 lineage-specific clusters in the class of *Gracilibacteria*.

777

779 **References**

- 780 1. Sunagawa, S. *et al.* Ocean plankton. Structure and function of the global ocean  
781 microbiome. *Science* **348**, 1261359 (2015).
- 782 2. Duarte, C. M. Seafaring in the 21st Century: The Malaspina 2010 Circumnavigation  
783 Expedition. *Limnol. Oceanogr. Bull.* **24**, 11–14 (2015).
- 784 3. Kopf, A. *et al.* The ocean sampling day consortium. *Gigascience* **4**, 27 (2015).
- 785 4. Lloyd-Price, J. *et al.* Strains, functions and dynamics in the expanded Human  
786 Microbiome Project. *Nature* **550**, 61–66 (2017).
- 787 5. Rusch, D. B. *et al.* The Sorcerer II Global Ocean Sampling Expedition: Northwest  
788 Atlantic through Eastern Tropical Pacific. *PLoS Biol.* **5**, 1–34 (2007).
- 789 6. Finn, R. D. *et al.* The Pfam protein families database: towards a more sustainable  
790 future. *Nucleic Acids Res.* **44**, D279–D285 (2016).
- 791 7. Steinegger, M. *et al.* HH-suite3 for fast remote homology detection and deep protein  
792 annotation. *BMC Bioinformatics* **20**, 473 (2019).
- 793 8. Deorowicz, S., Debudaj-Grabysz, A. & Gudyś, A. FAMSA: Fast and accurate multiple  
794 sequence alignment of huge protein families. *Sci. Rep.* **6**, 33964–33964 (2016).
- 795 9. Eberhardt, R. Y. *et al.* AntiFam: a tool to help identify spurious ORFs in protein  
796 annotation. *Database* **2012**, bas003–bas003 (2012).
- 797 10. Yooseph, S., Li, W. & Sutton, G. Gene identification and protein classification in  
798 microbial metagenomic sequence data via incremental clustering. *BMC Bioinformatics*  
799 **9**, 1–13 (2008).
- 800 11. The UniProt Consortium. UniProt: the universal protein knowledgebase. *Nucleic Acids*  
801 *Res.* **45**, D158–D169 (2017).
- 802 12. NCBI Resource Coordinators. Database resources of the National Center for  
803 Biotechnology Information. *Nucleic Acids Res.* **46**, D8–D13 (2018).
- 804 13. Steinegger, M. & Söding, J. MMseqs2 enables sensitive protein sequence searching for

- 805 the analysis of massive data sets. *Nat. Biotechnol.* **advance on**, (2017).
- 806 14. Hingamp, P. *et al.* Exploring nucleo-cytoplasmic large DNA viruses in Tara Oceans  
807 microbial metagenomes. *ISME J.* **7**, 1678–1695 (2013).
- 808 15. Parks, D. H. *et al.* A standardized bacterial taxonomy based on genome phylogeny  
809 substantially revises the tree of life. *Nat. Biotechnol.* **36**, 996–1004 (2018).
- 810 16. Mirdita, M. *et al.* Uniclust databases of clustered and deeply annotated protein  
811 sequences and alignments. *Nucleic Acids Res.* **45**, D170–D176 (2017).
- 812 17. Remmert, M., Biegert, A., Hauser, A. & Söding, J. HHblits: Lightning-fast iterative  
813 protein sequence searching by HMM-HMM alignment. *Nat. Methods* **9**, 173–175 (2012).
- 814 18. Perdigão, N., Rosa, A. C. & O’Donoghue, S. I. The Dark Proteome Database. *BioData*  
815 *Min.* **10**, 1–11 (2017).
- 816 19. Habchi, J., Tompa, P., Longhi, S. & Uversky, V. N. Introducing protein intrinsic disorder.  
817 *Chem. Rev.* **114**, 6561–6588 (2014).
- 818 20. van Dongen, S. & Abreu-Goodger, C. Using MCL to Extract Clusters from Networks. in  
819 *Bacterial Molecular Networks: Methods and Protocols* (eds. van Helden, J., Toussaint,  
820 A. & Thieffry, D.) 281–295 (Springer New York, 2012).
- 821 21. Olson, D. K., Yoshizawa, S., Boeuf, D., Iwasaki, W. & DeLong, E. F. Proteorhodopsin  
822 variability and distribution in the North Pacific Subtropical Gyre. *ISME J.* **12**, 1047–1060  
823 (2018).
- 824 22. Finn, R. D., Clements, J. & Eddy, S. R. HMMER web server: interactive sequence  
825 similarity searching. *Nucleic Acids Res.* **39**, W29–W37 (2011).
- 826 23. Boeuf, D., Audic, S., Brillet-Guéguen, L., Caron, C. & Jeanthon, C. MicRhoDE: a  
827 curated database for the analysis of microbial rhodopsin diversity and evolution.  
828 *Database* **2015**, (2015).
- 829 24. Matsen, F. A., Kodner, R. B. & Armbrust, E. V. pplacer: linear time maximum-likelihood  
830 and Bayesian phylogenetic placement of sequences onto a fixed reference tree. *BMC*  
831 *Bioinformatics* **11**, 538 (2010).
- 832 25. Li, W. & Godzik, A. Cd-hit: a fast program for clustering and comparing large sets of



- 833 protein or nucleotide sequences. *Bioinformatics* **22**, 1658–1659 (2006).
- 834 26. Barbera, P. *et al.* EPA-ng: Massively Parallel Evolutionary Placement of Genetic  
835 Sequences. *Syst. Biol.* **68**, 365–369 (2019).
- 836 27. Stamatakis, A. RAxML version 8: a tool for phylogenetic analysis and post-analysis of  
837 large phylogenies. *Bioinformatics* **30**, 1312–1313 (2014).
- 838 28. Berger, S. A. & Stamatakis, A. PaPaRa 2.0: a vectorized algorithm for probabilistic  
839 phylogeny-aware alignment extension. [Heidelberg Institute for Theoretical Studies,](http://sco.h-its.org/exelixis/publications.html)  
840 <http://sco.h-its.org/exelixis/publications.html>. *Exelixis-RRDR-2012-2015* (2012).
- 841 29. Schliep, K. P. phangorn: phylogenetic analysis in R. *Bioinformatics* **27**, 592–593 (2011).
- 842 30. Needham, D. M. *et al.* A distinct lineage of giant viruses brings a rhodopsin photosystem  
843 to unicellular marine predators. *Proc. Natl. Acad. Sci. U. S. A.* **116**, 20574–20583  
844 (2019).
- 845 31. Daily, J. Parasail: SIMD C library for global, semi-global, and local pairwise sequence  
846 alignments. *BMC Bioinformatics* **17**, 81–81 (2016).
- 847 32. Méheust, R., Burstein, D., Castelle, C. J. & Banfield, J. F. The distinction of CPR  
848 bacteria from other bacteria based on protein family content. *Nat. Commun.* **10**, 4173  
849 (2019).
- 850 33. Eren, M. A. *et al.* Anvi'o: an advanced analysis and visualization platform for 'omics  
851 data. *PeerJ* **3**, e1319 (2015).
- 852 34. Vinh, N. X., Epps, J. & Bailey, J. Information theoretic measures for clusterings  
853 comparison: is a correction for chance necessary? in *Proceedings of the 26th Annual*  
854 *International Conference on Machine Learning* 1073–1080 (Association for Computing  
855 Machinery, 2009).
- 856 35. Delmont, T. O. *et al.* Nitrogen-Fixing Populations Of Planctomycetes And Proteobacteria  
857 Are Abundant In The Surface Ocean. *Doi.Org* **3**, (2017).
- 858 36. Seemann, T. Prokka: rapid prokaryotic genome annotation. *Bioinformatics* **30**, 2068–  
859 2069 (2014).
- 860 37. Wyman, S. K., Avila-Herrera, A., Nayfach, S. & Pollard, K. S. A most wanted list of

- 861 conserved microbial protein families with no known domains. *PLoS One* **13**, e0205749–  
862 e0205749 (2018).
- 863 38. Hurwitz, B. L. & Sullivan, M. B. The Pacific Ocean Virome (POV): A Marine Viral  
864 Metagenomic Dataset and Associated Protein Clusters for Quantitative Viral Ecology.  
865 *PLoS One* **8**, (2013).
- 866 39. Brum, J. R. *et al.* Ocean plankton. Patterns and ecological drivers of ocean viral  
867 communities. *Science* **348**, 1261498 (2015).
- 868 40. Mitchell, A. L. *et al.* EBI Metagenomics in 2017: enriching the analysis of microbial  
869 communities, from sequence reads to assemblies. *Nucleic Acids Res.* **46**, D726–D735  
870 (2018).
- 871 41. Lee, S. T. M. *et al.* Tracking microbial colonization in fecal microbiota transplantation  
872 experiments via genome-resolved metagenomics. *Microbiome* **5**, 1–10 (2017).
- 873 42. Price, M. N. *et al.* Mutant phenotypes for thousands of bacterial genes of unknown  
874 function. *Nature* **557**, 503–509 (2018).
- 875 43. Mendler, K. *et al.* AnnoTree: visualization and exploration of a functionally annotated  
876 microbial tree of life. *Nucleic Acids Res.* **47**, 4442–4448 (2019).
- 877 44. Rinke, C. *et al.* Insights into the phylogeny and coding potential of microbial dark matter.  
878 *Nature* **499**, 431–437 (2013).
- 879 45. Sieber, C. M. K. *et al.* Unusual metabolism and hypervariation in the genome of a  
880 Gracilibacteria (BD1-5) from an oil degrading community. *bioRxiv* 595074 (2019)  
881 doi:10.1101/595074.
- 882 46. Espinoza, J. L. *et al.* Supragingival Plaque Microbiome Ecology and Functional Potential  
883 in the Context of Health and Disease. *MBio* **9**, (2018).

884
